# Supplementary material for: Global restoration opportunities in tropical rainforest landscapes
Source: PubMed Central journal article supplement — Sci Adv. 2019 Jul 3;5(7):eaav3223. doi: 10.1126/sciadv.aav3223 (PMC6609219; doi:10.1126/sciadv.aav3223), 2019-07-03
Supplement: aav3223_SM.pdf [file aav3223_SM.pdf]

## Supplementary Materials for

### Global restoration opportunities in tropical rainforest landscapes

Pedro H. S. Brancalion\*, Aidin Niamir, Eben Broadbent, Renato Crouzeilles, Felipe S. M. Barros, Angelica M. Almeyda Zambrano, Alessandro Baccini, James Aronson, Scott Goetz, J. Leighton Reid, Bernardo B. N. Strassburg, Sarah Wilson, Robin L. Chazdon

\*Corresponding author. Email: pedrob@usp.br

Published 3 July 2019, *Sci. Adv.* **5**, eaav3223 (2019)

DOI: 10.1126/sciadv.aav3223

#### This PDF file includes:

Fig. S1. Distribution of the total restoration area in relation to the ROS in tropical rainforest landscapes.

Fig. S2. ROS of tropical rainforest landscapes of countries, with data renormalized for each country.

Fig. S3. ROS of tropical rainforest landscapes of biogeographical realms, with data renormalized for each realm (A, Neotropics; B, Afrotropics; C, Indo-Malaysia; D, Australasia).

Fig. S4. ROS of tropical rainforest landscapes of global hotspots for biodiversity conservation, with data renormalized for each hotspot.

Fig. S5. Identification of restorable areas.

Fig. S6. Restoration benefits.

Fig. S7. Restoration feasibility factors.

Table S1. Country's ROS, restorable area, and restorable area with a restoration score of >0.6 of tropical rainforest landscapes and their national pledges to the Bonn Challenge.

Table S2. Mean ROS, total area, restorable area, and restorable area with a restoration score of >0.6 of ecoregions within tropical rainforest landscapes.

Table S3. Mean ROS, study area, restorable area, and restorable area with a restoration score of >0.6 of KBAs within tropical rainforest landscapes.

Table S4. Mean ROS, total area, restorable area, and restorable area with a restoration score of >0.6 of tropical rainforest landscapes among hotspots for biodiversity conservation.

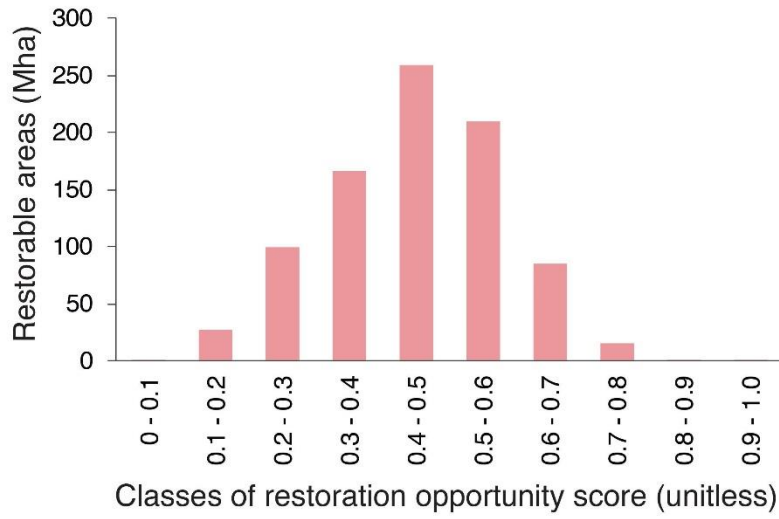

**Fig. S1. Distribution of the total restoration area in relation to the ROS in tropical rainforest landscapes.**

# Angola

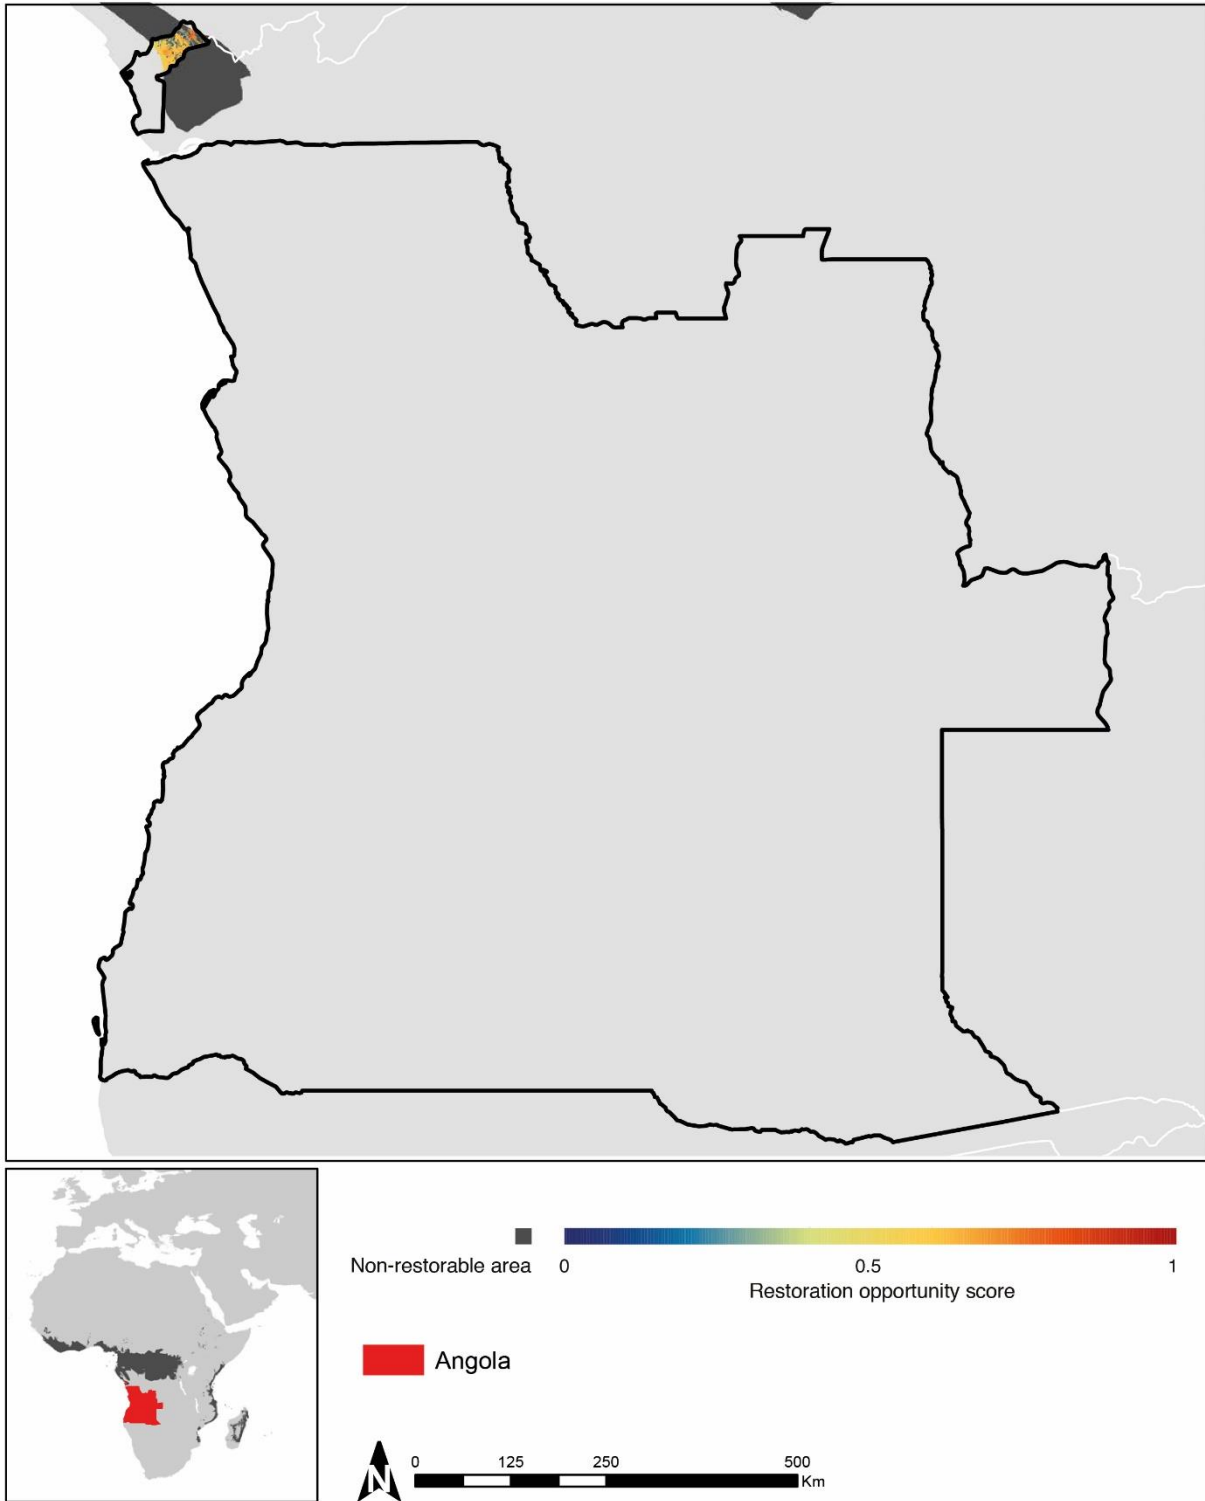

**Fig. S2. ROS of tropical rainforest landscapes of countries, with data renormalized for each country.** The depiction of boundaries and geographic names is simply for display purposes and does not imply views regarding the legal status of any territory or country.

# Argentina

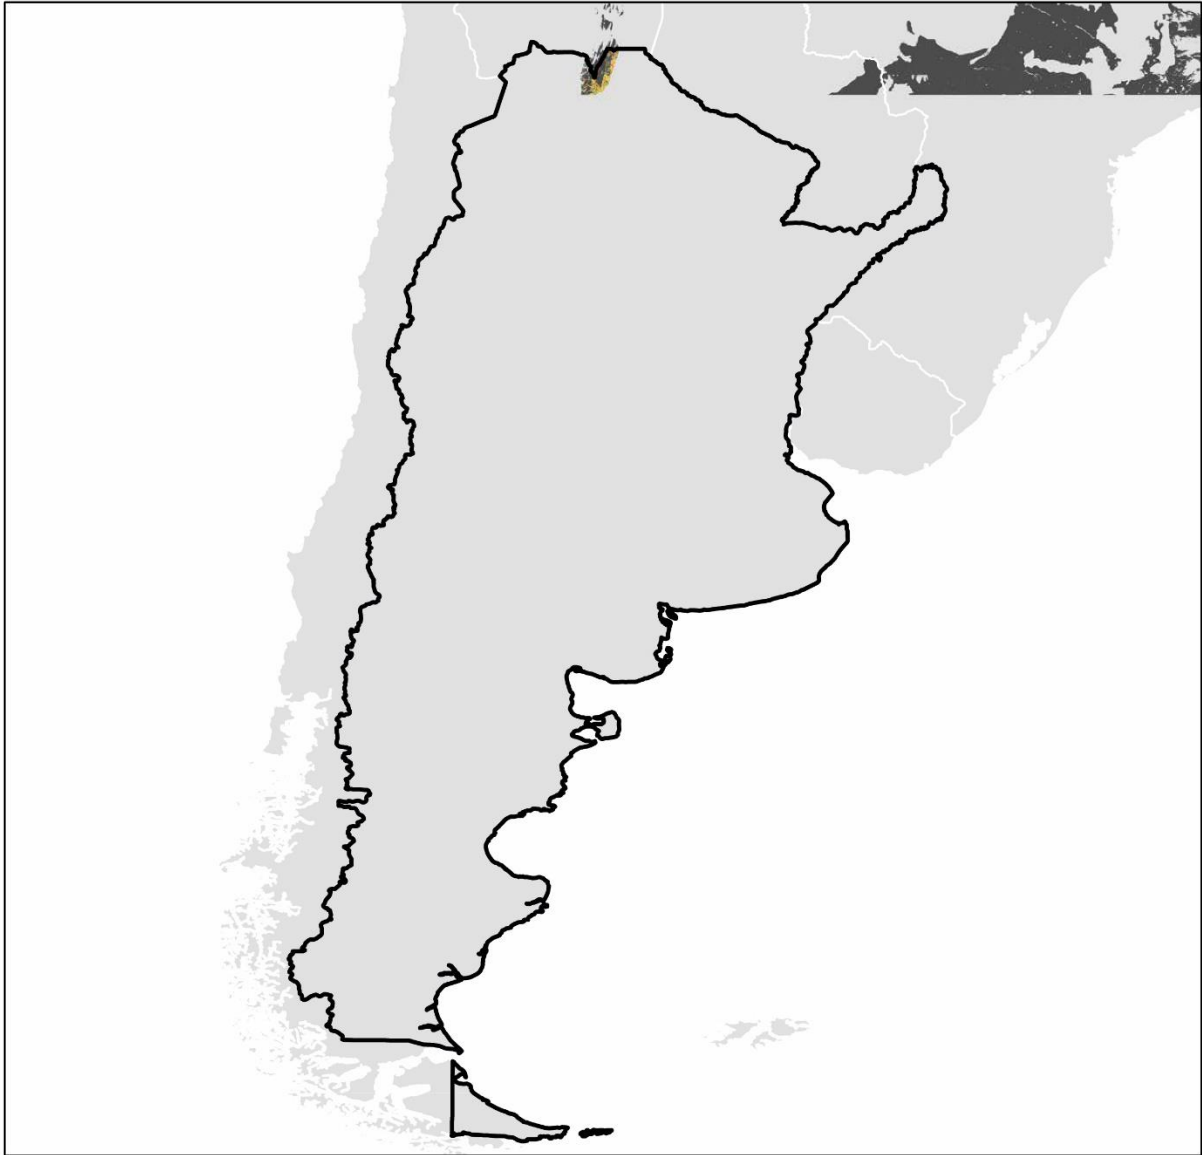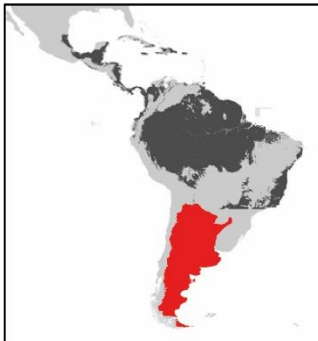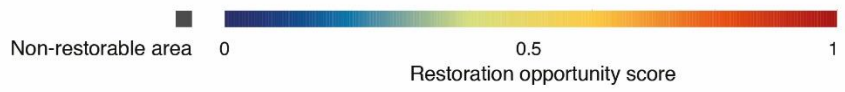

Argentina

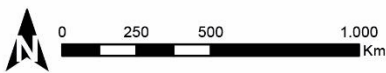



# Bangladesh

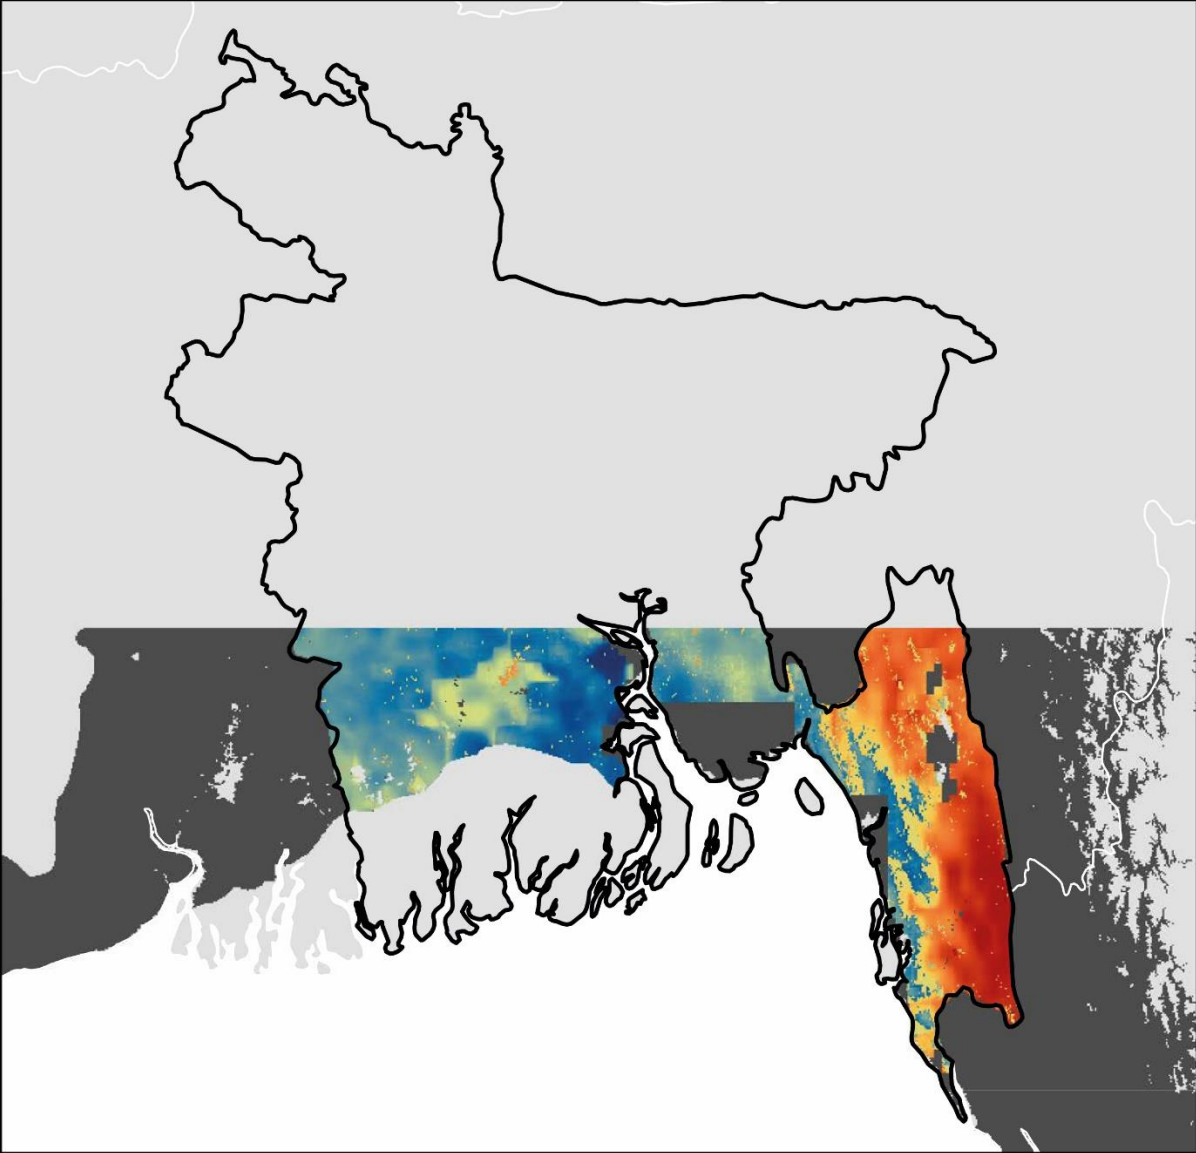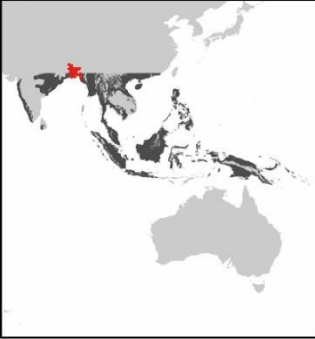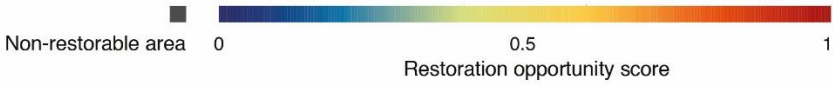

 Bangladesh

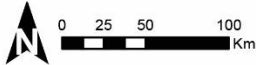

# Belize

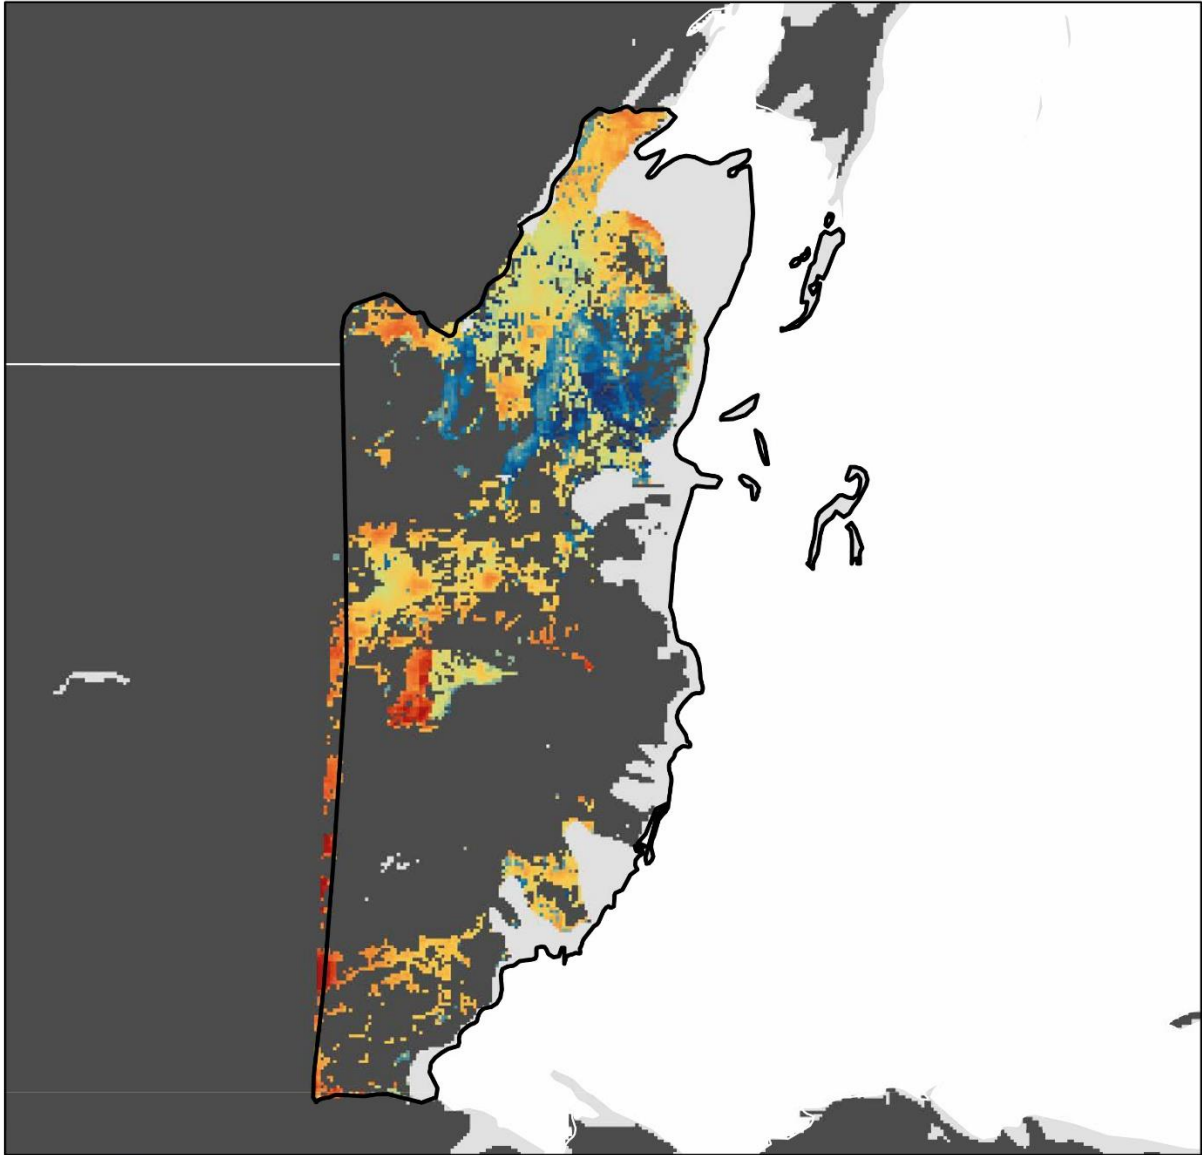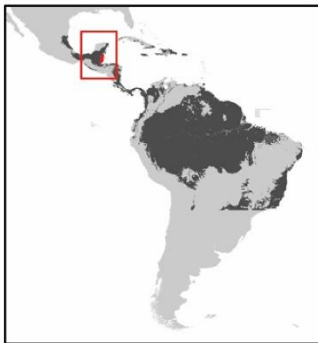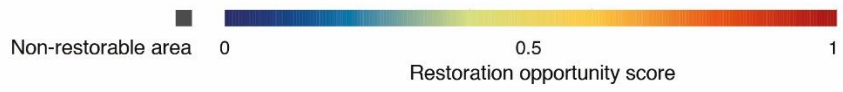

 Belize

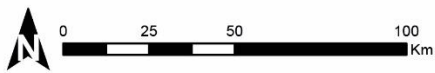

# Bolivia

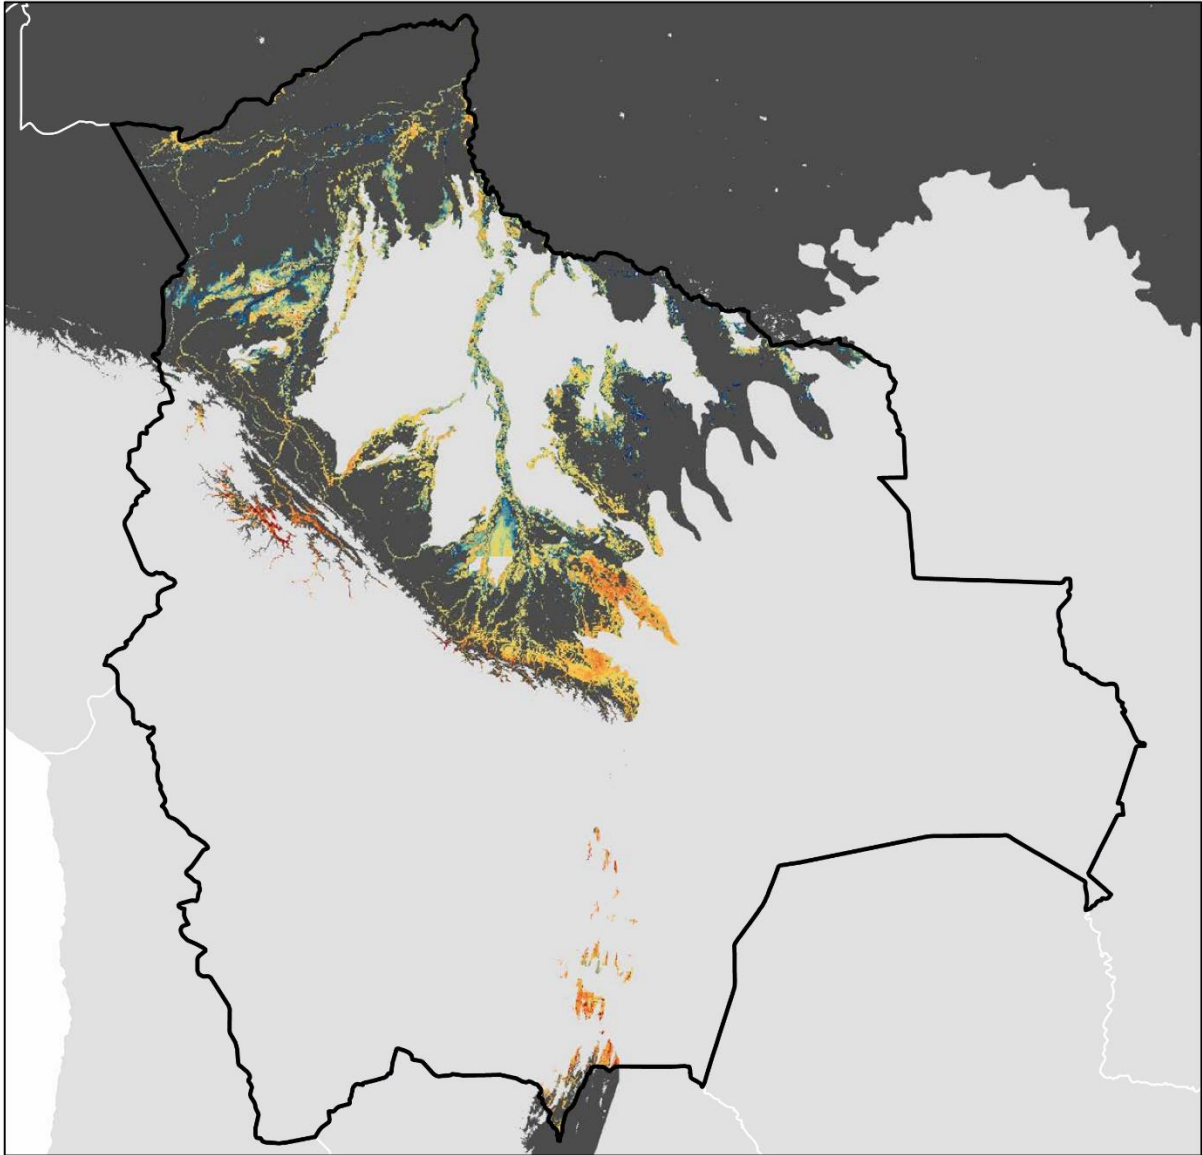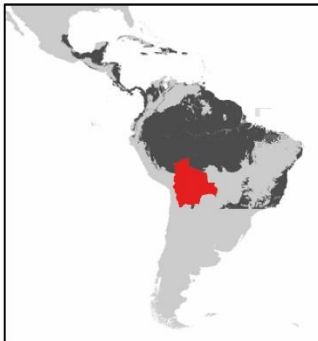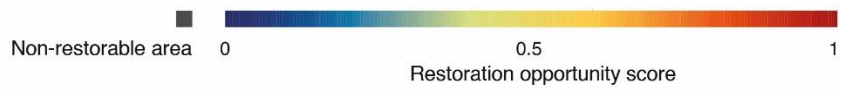

Non-restorable area

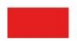

Bolivia

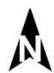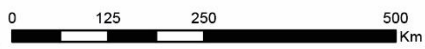

# Brazil

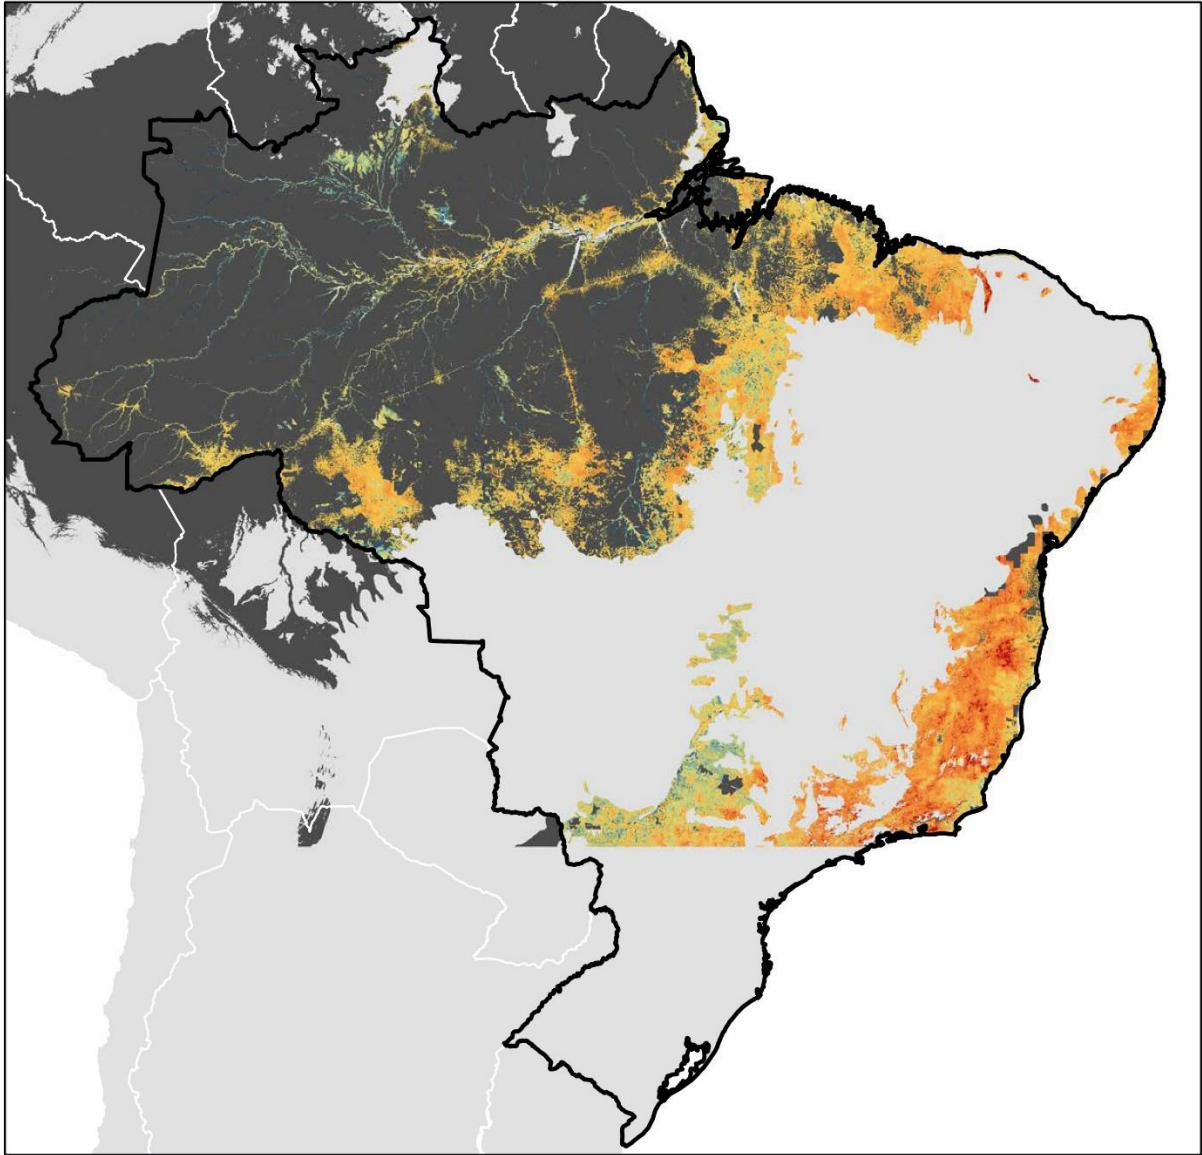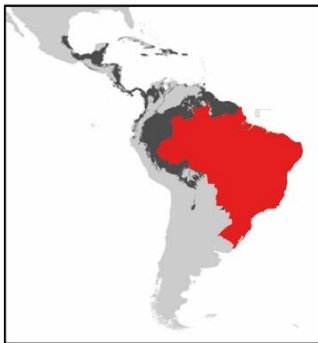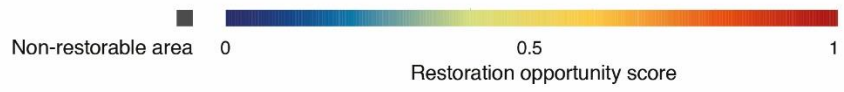

 Brazil

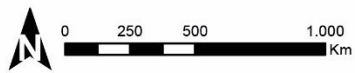

# Brunei

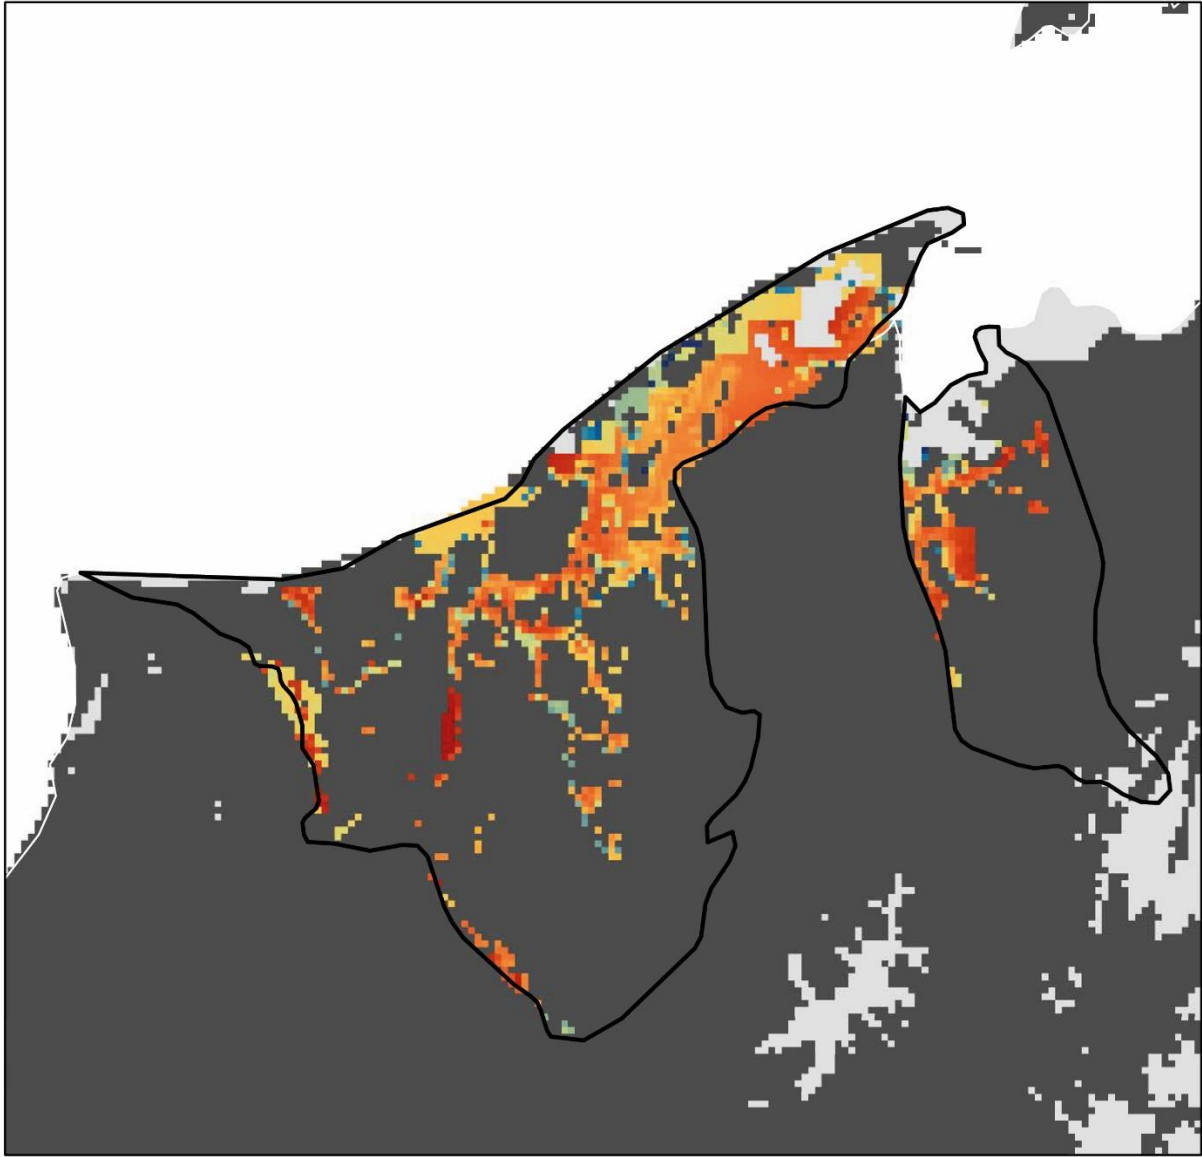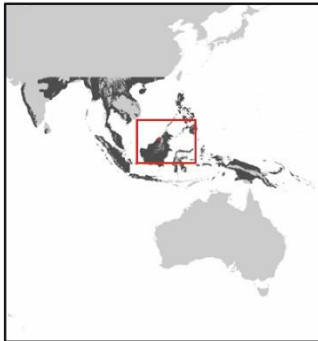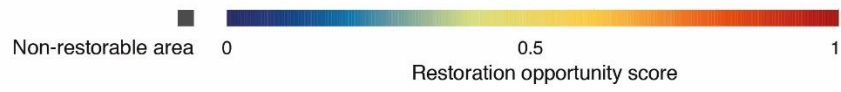

Brunei

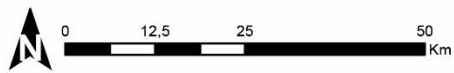

# Burundi

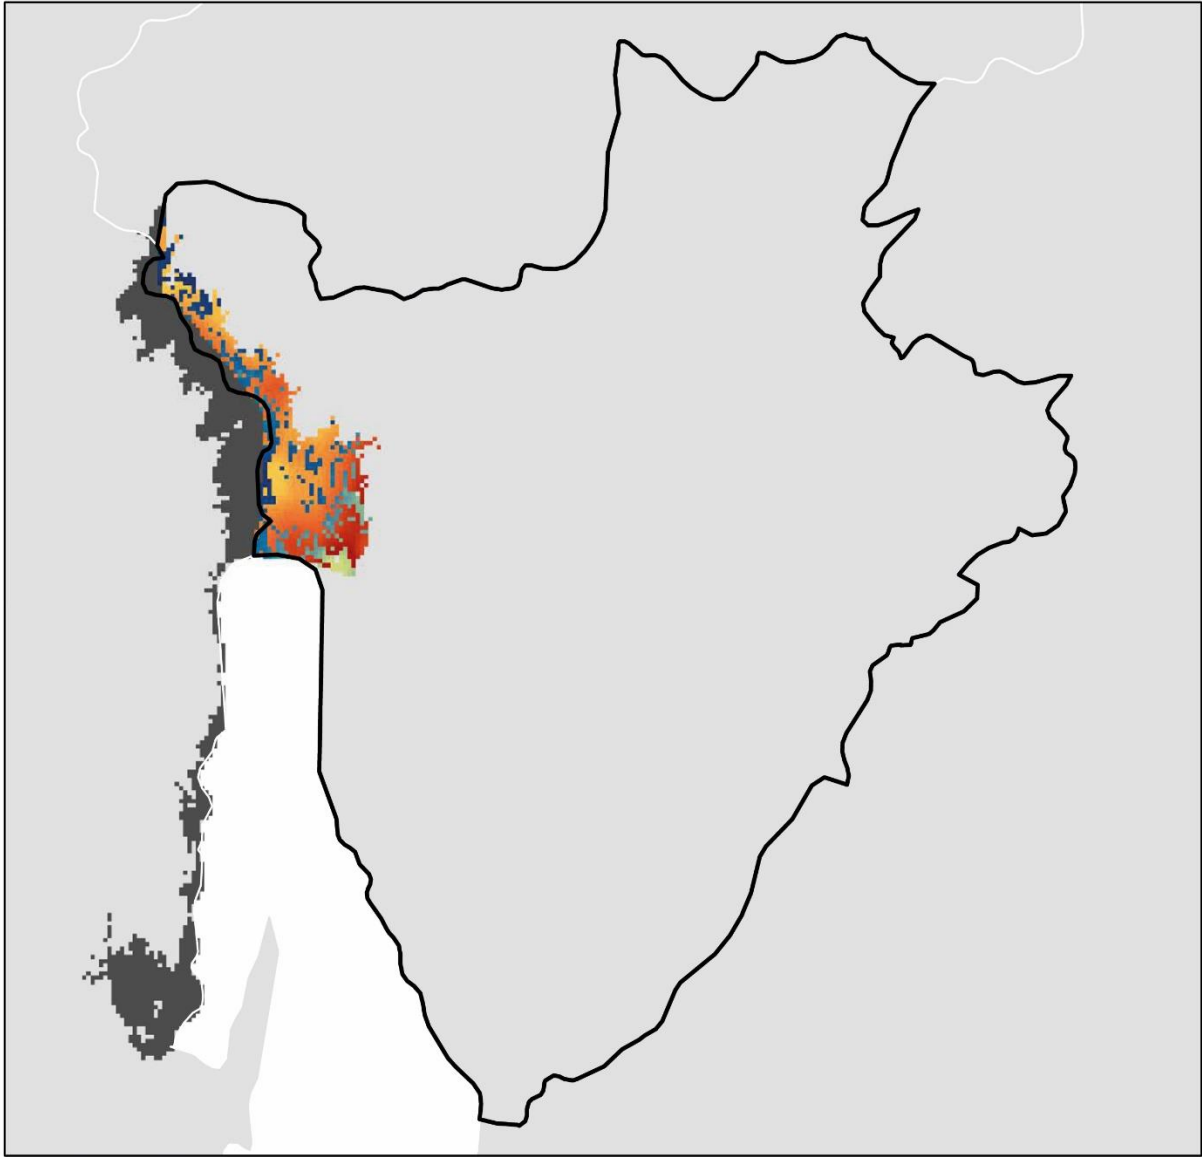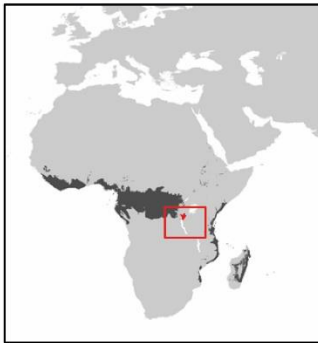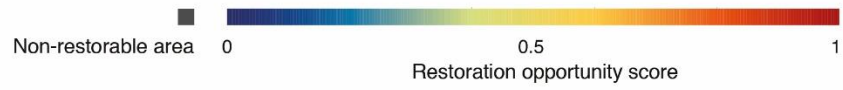

Burundi

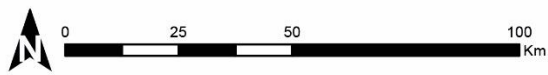



# Cambodia

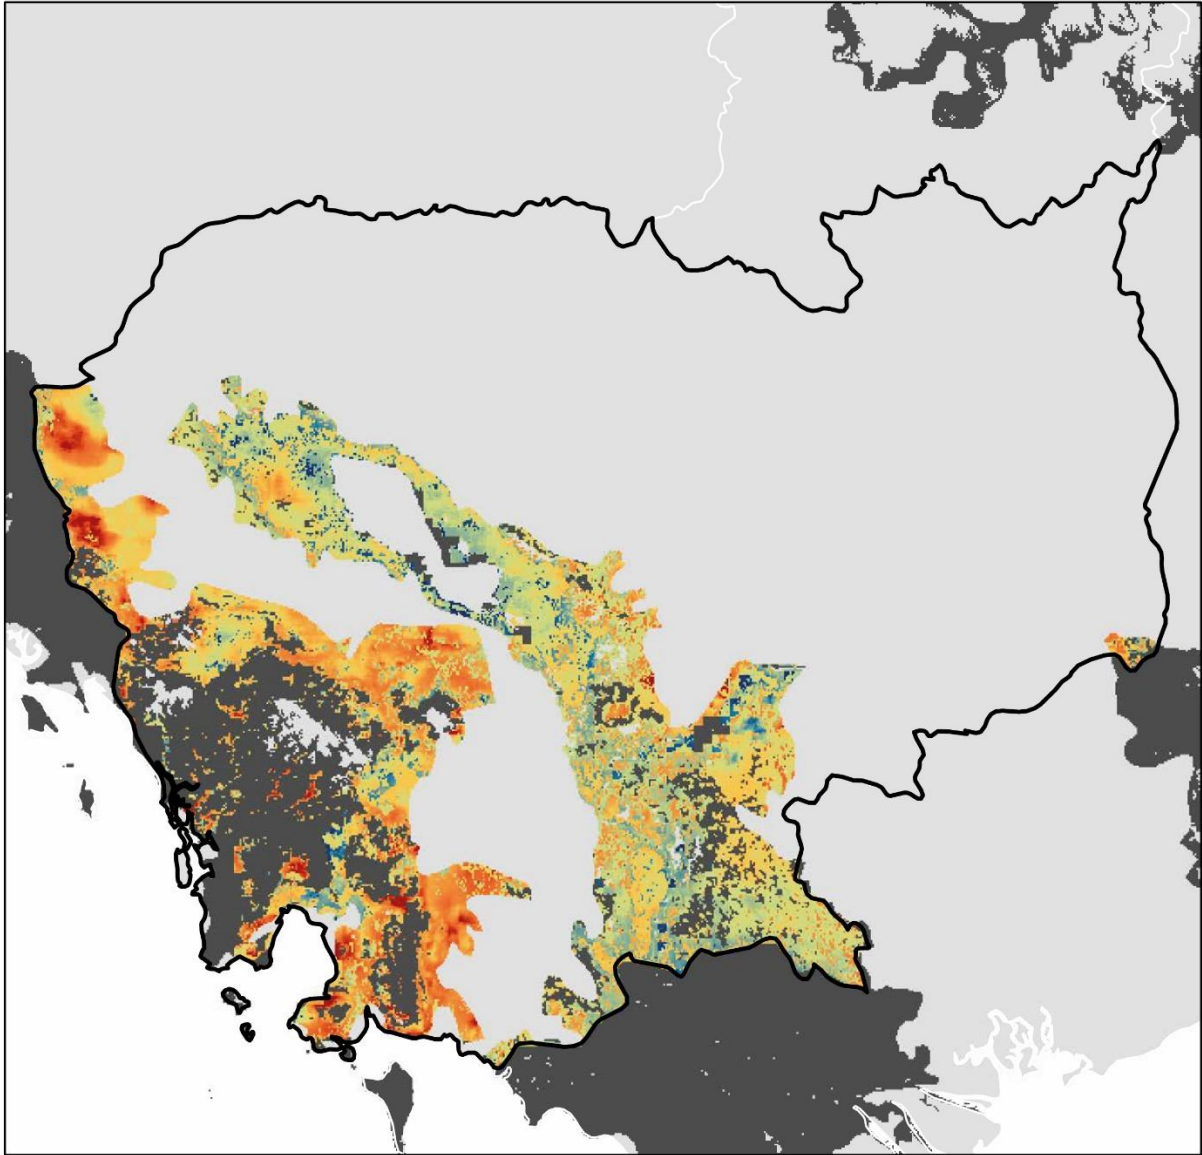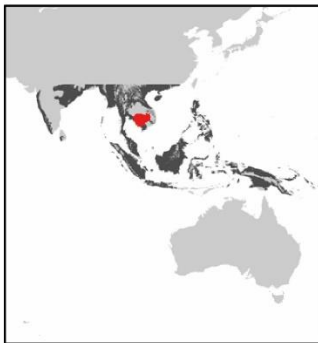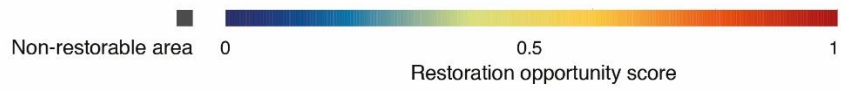

 Cambodia

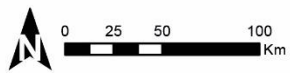

# Cameroon

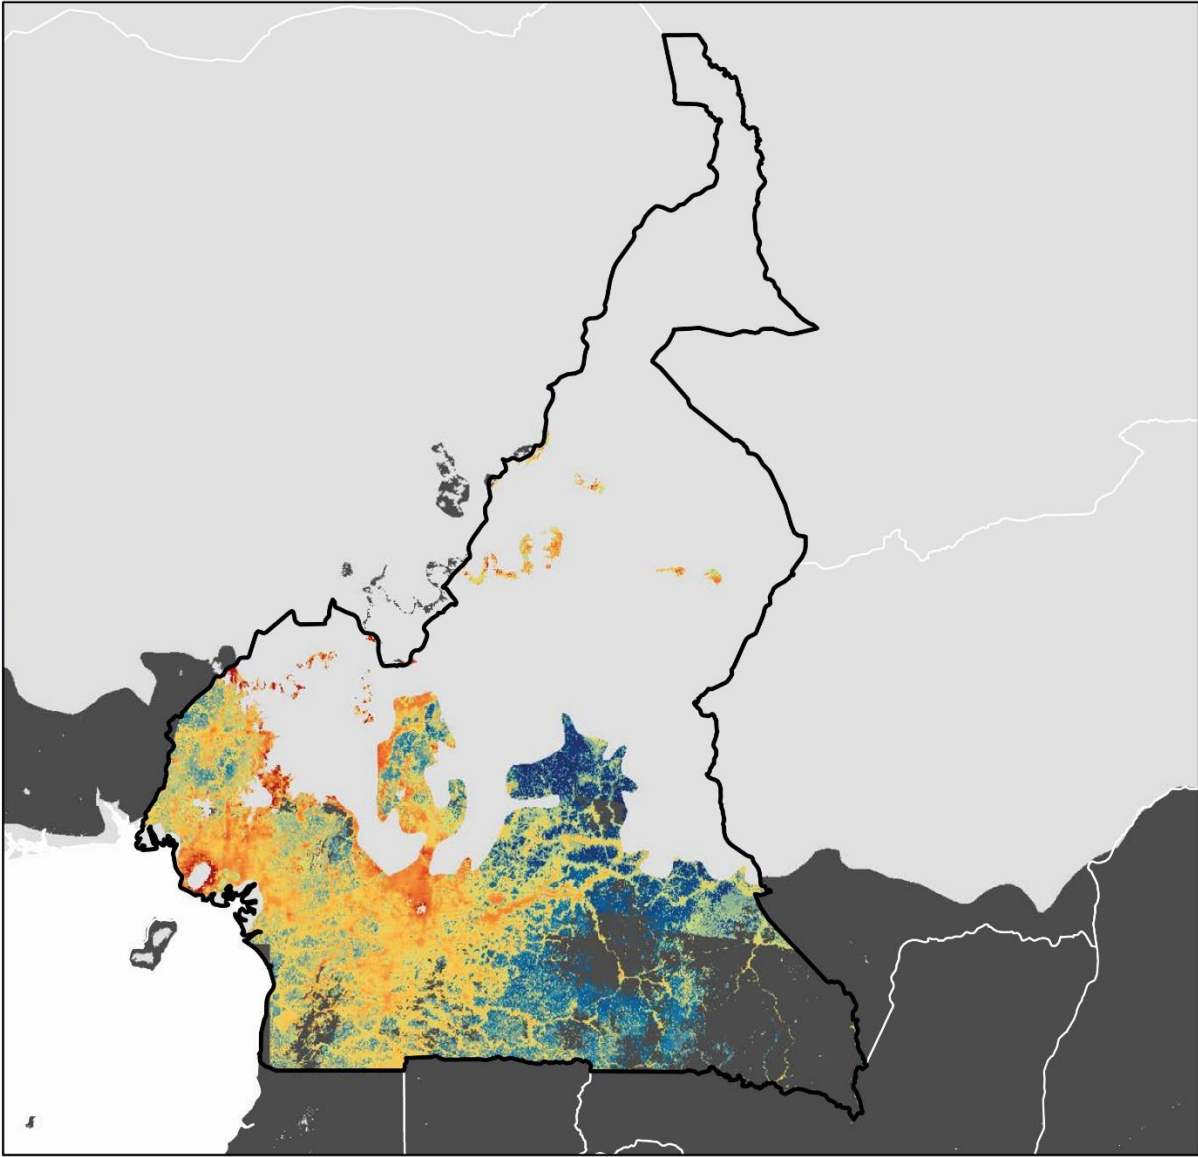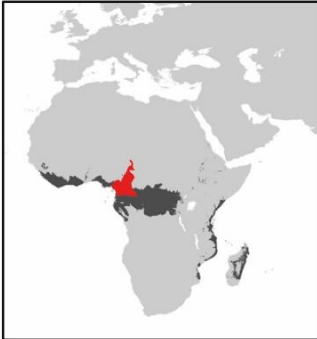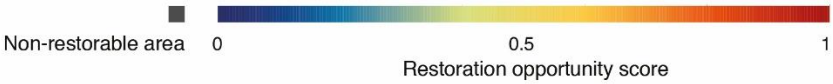

Cameroon

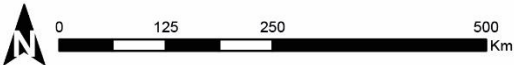



# Central African Republic

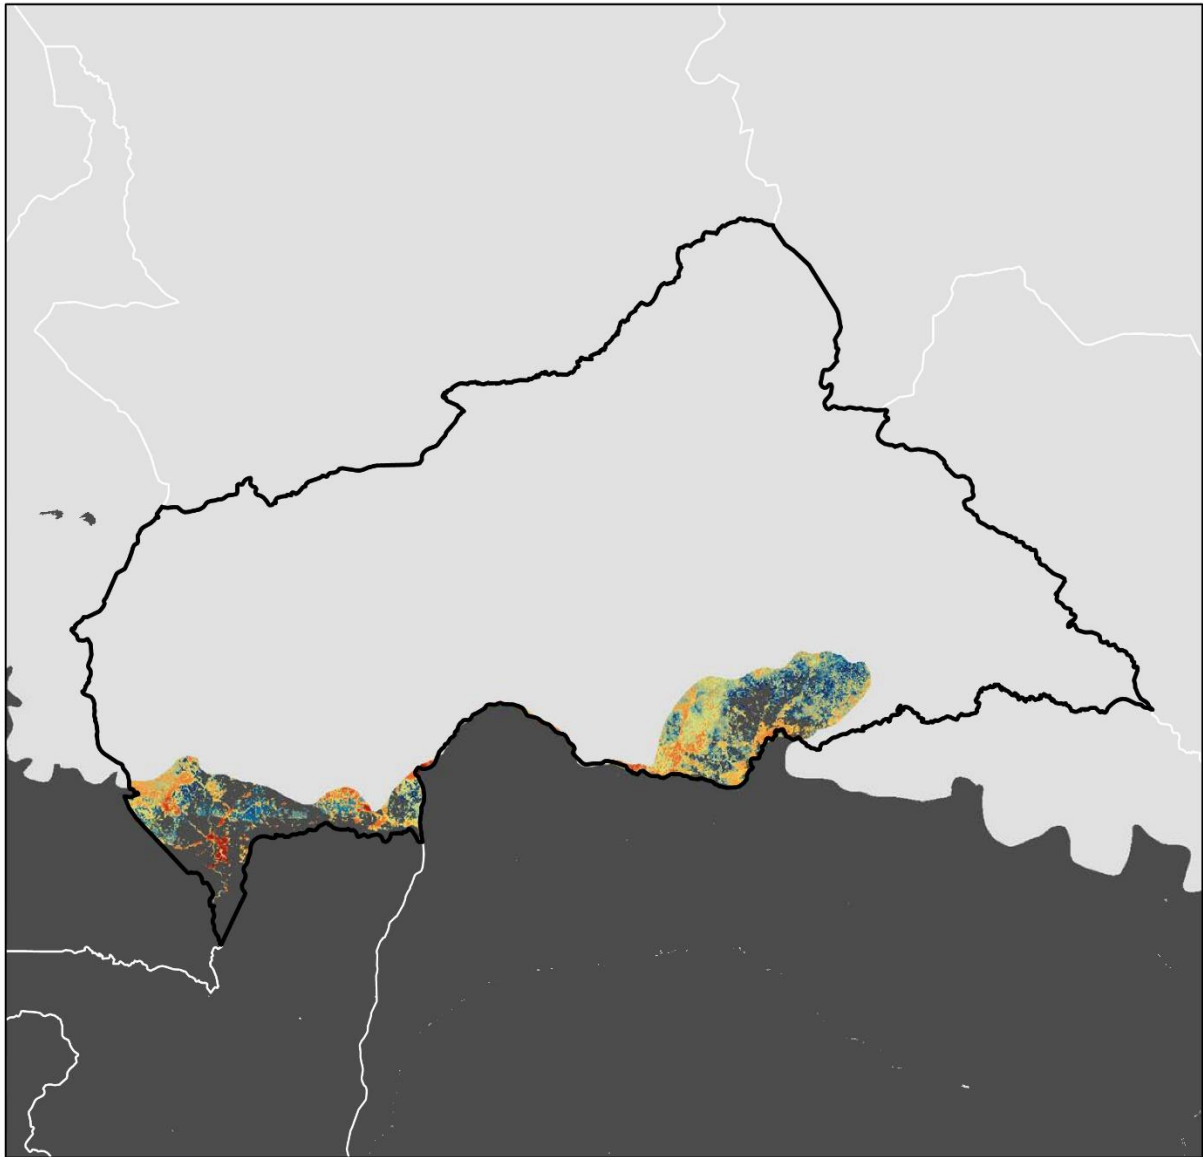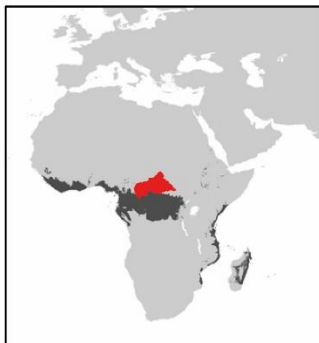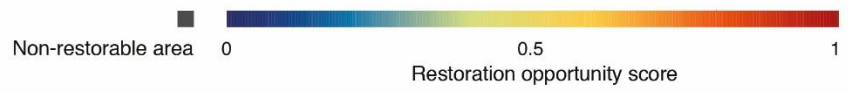

Central African Republic

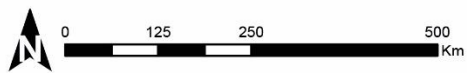

# China

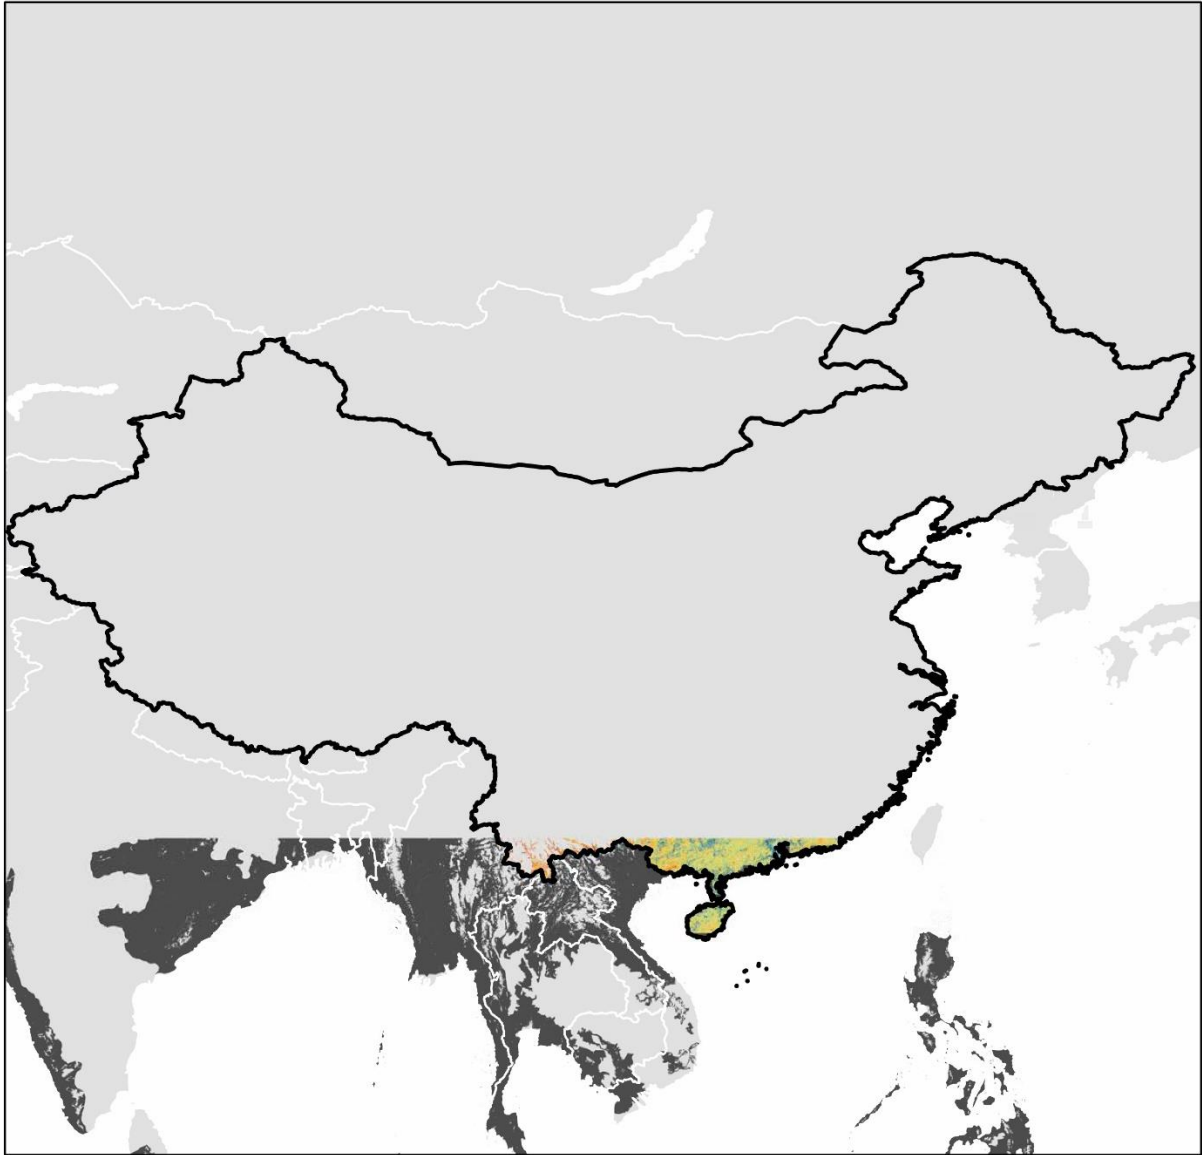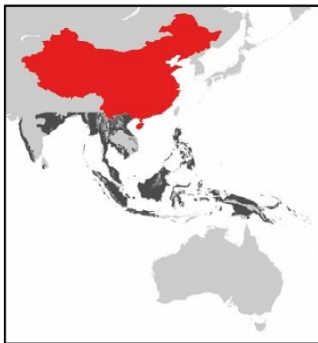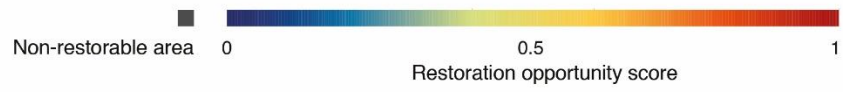

■ China

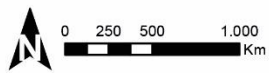

# Colombia

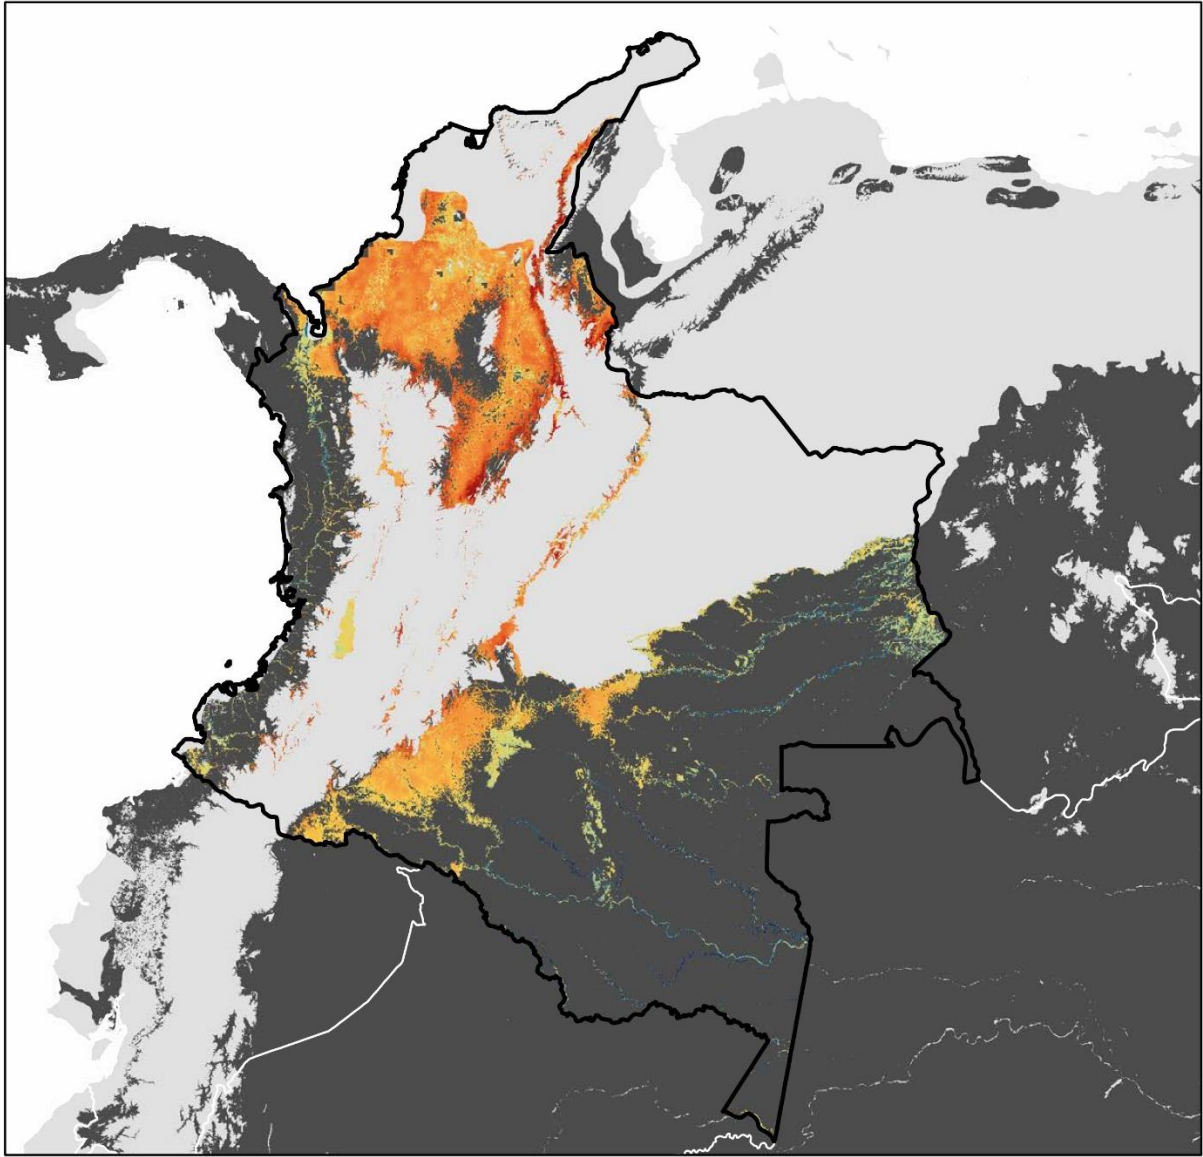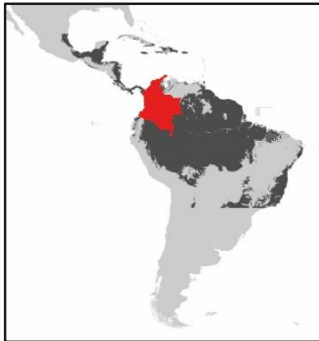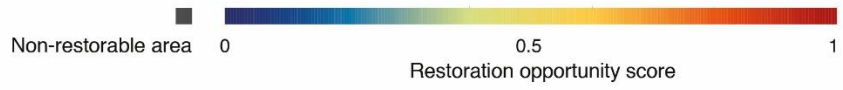

■ Colombia

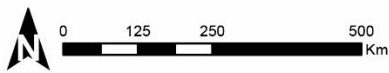

# Costa Rica

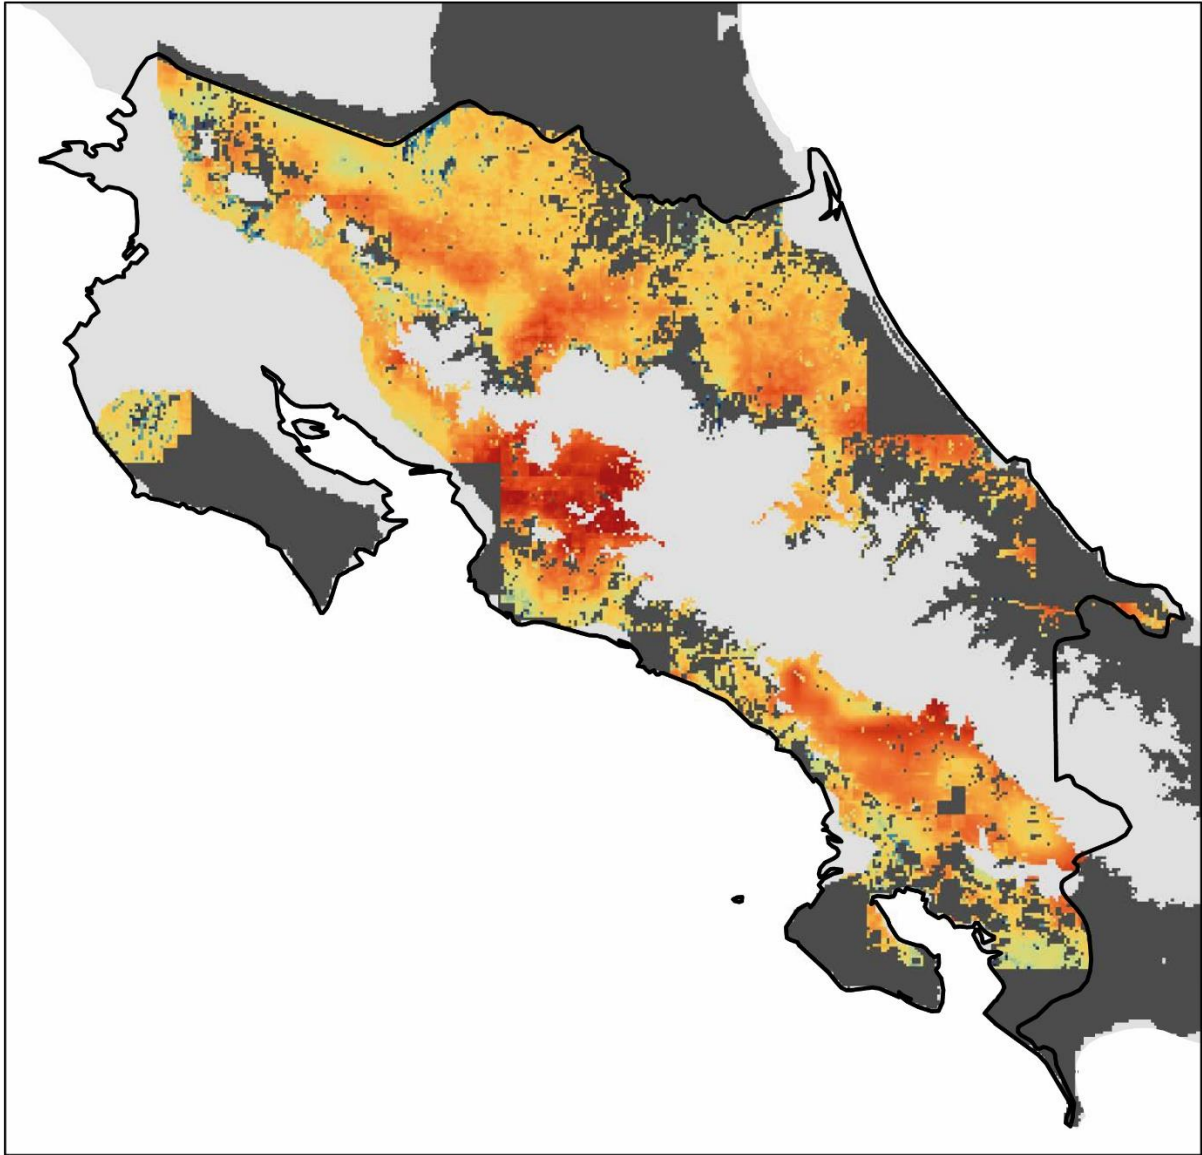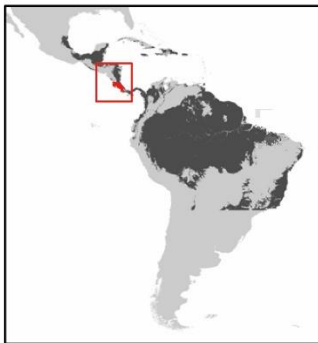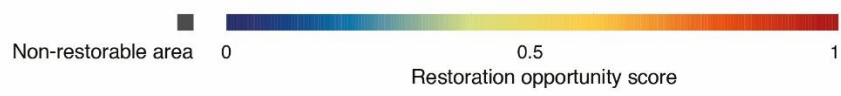

Costa Rica

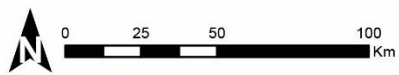

# Cuba

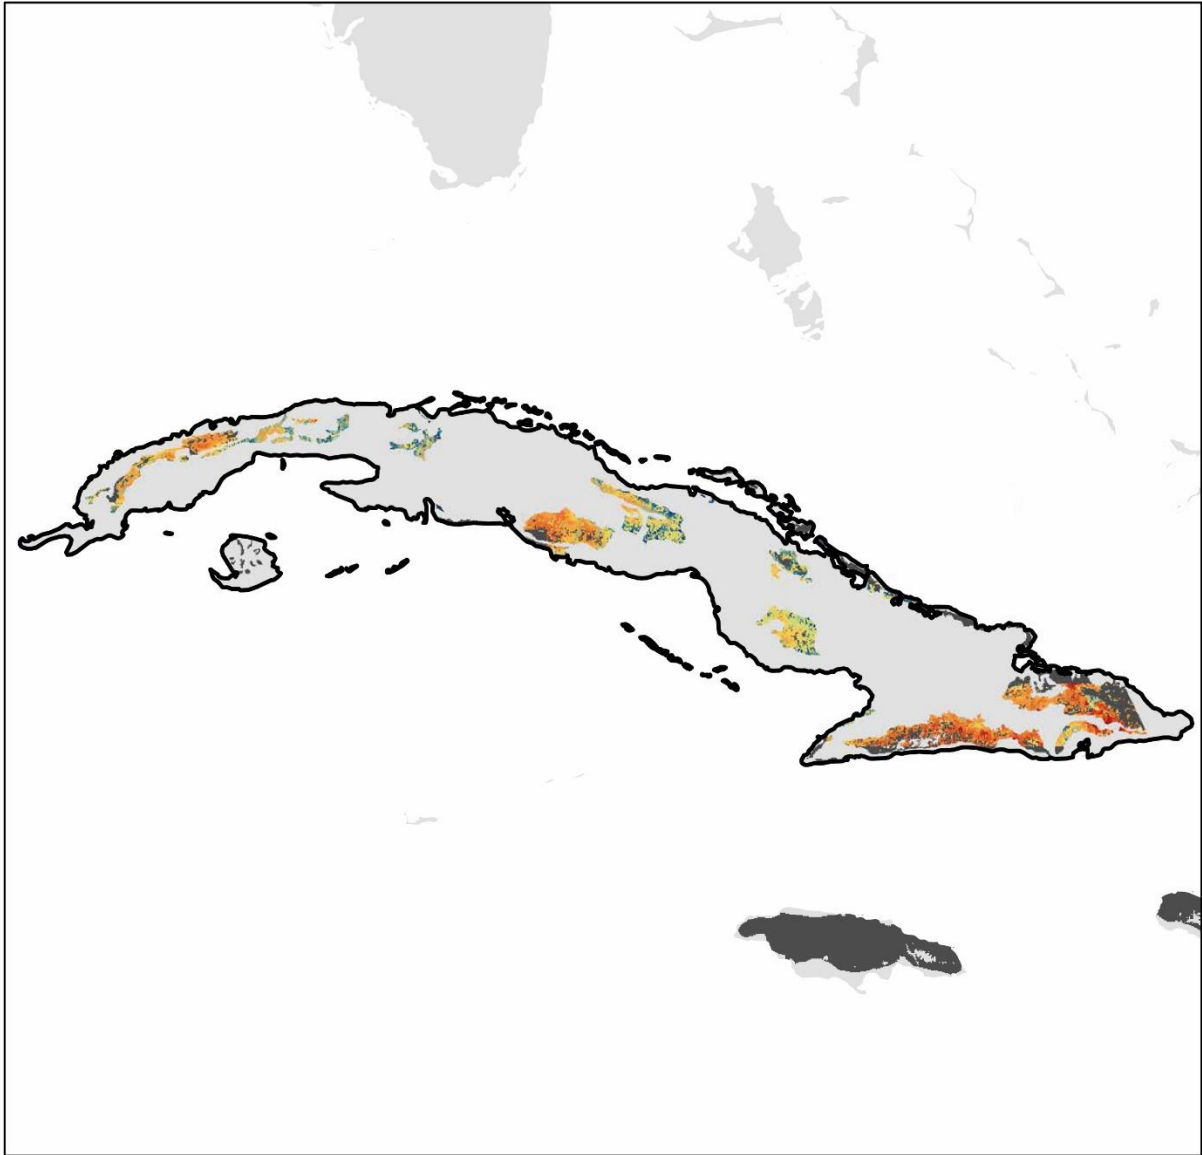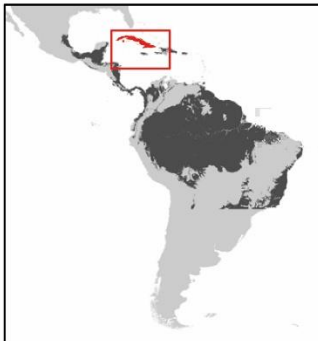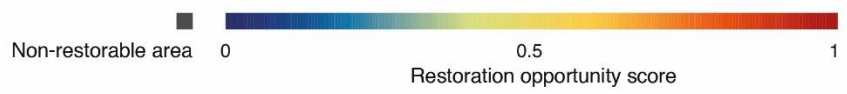

Cuba

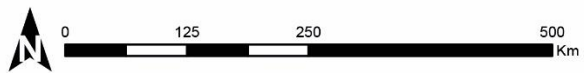



# Democratic Republic of the Congo

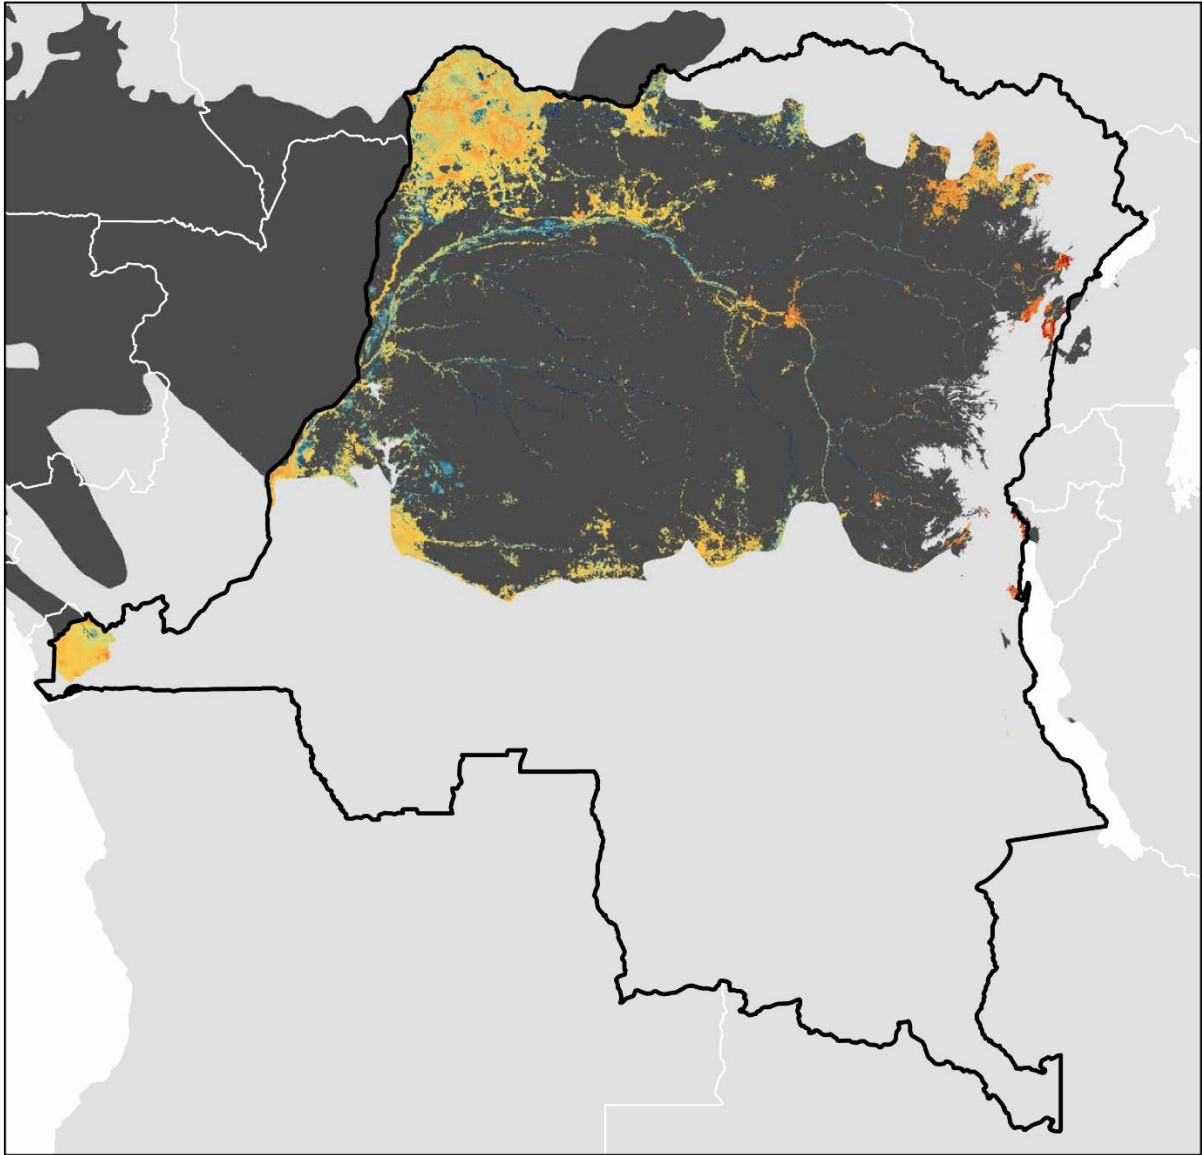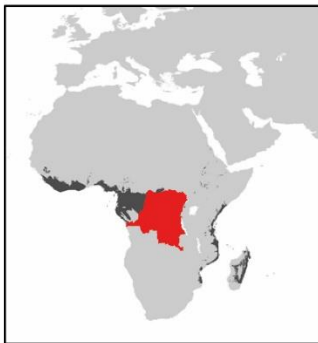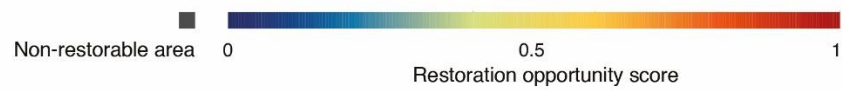

 Democratic Republic of the Congo

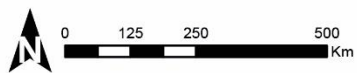

# Dominican Republic

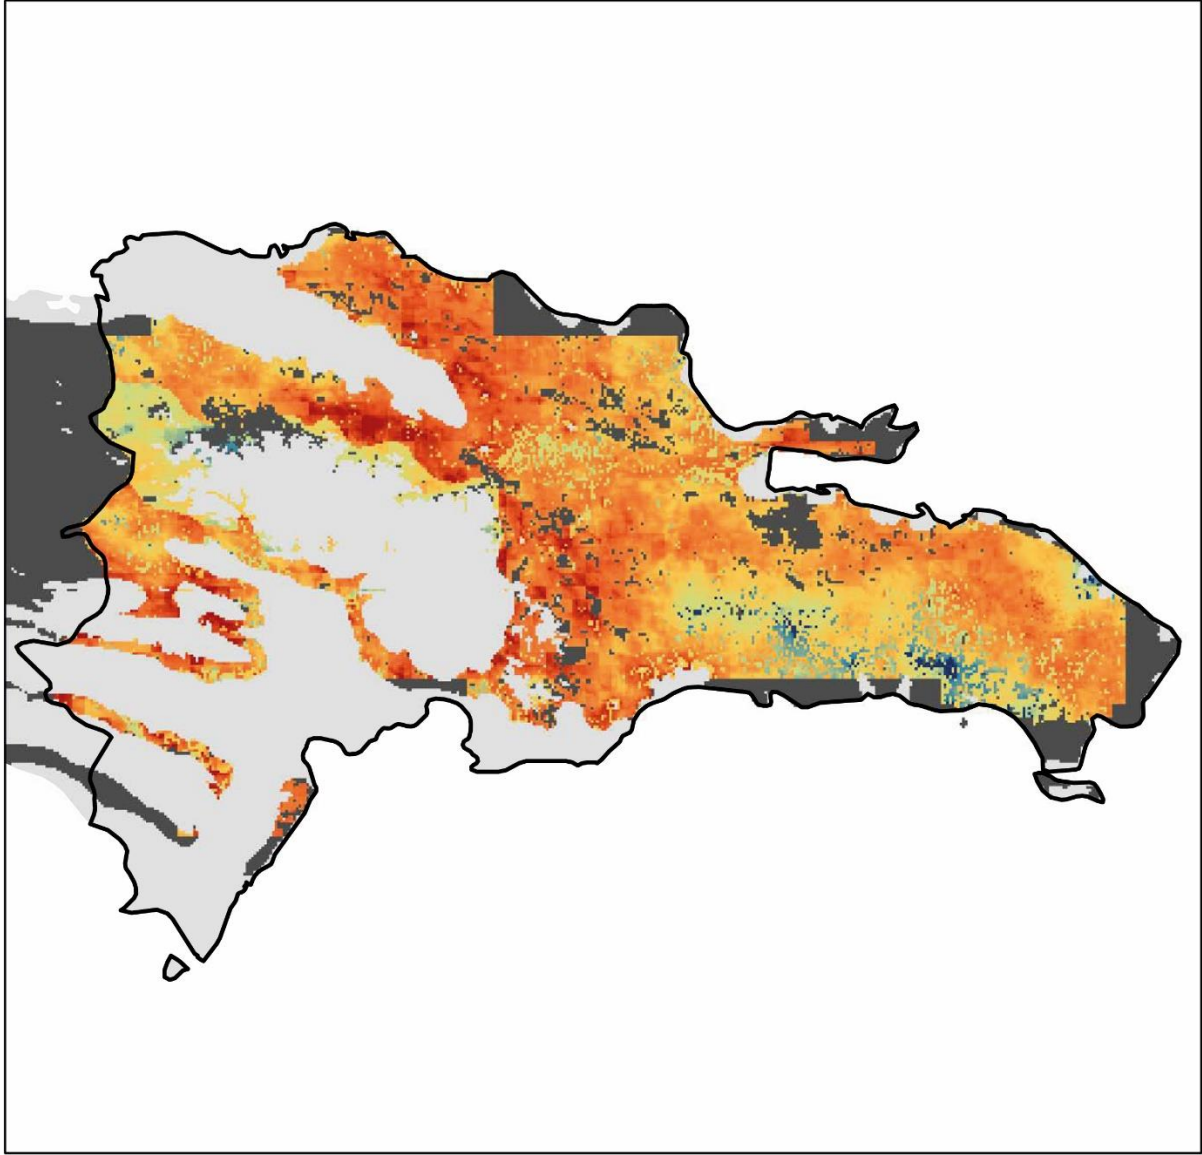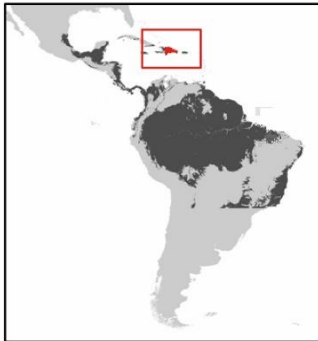

Non-restorable area 0 0.5 1  
Restoration opportunity score

 Dominican Republic

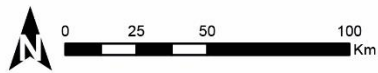

# Ecuador

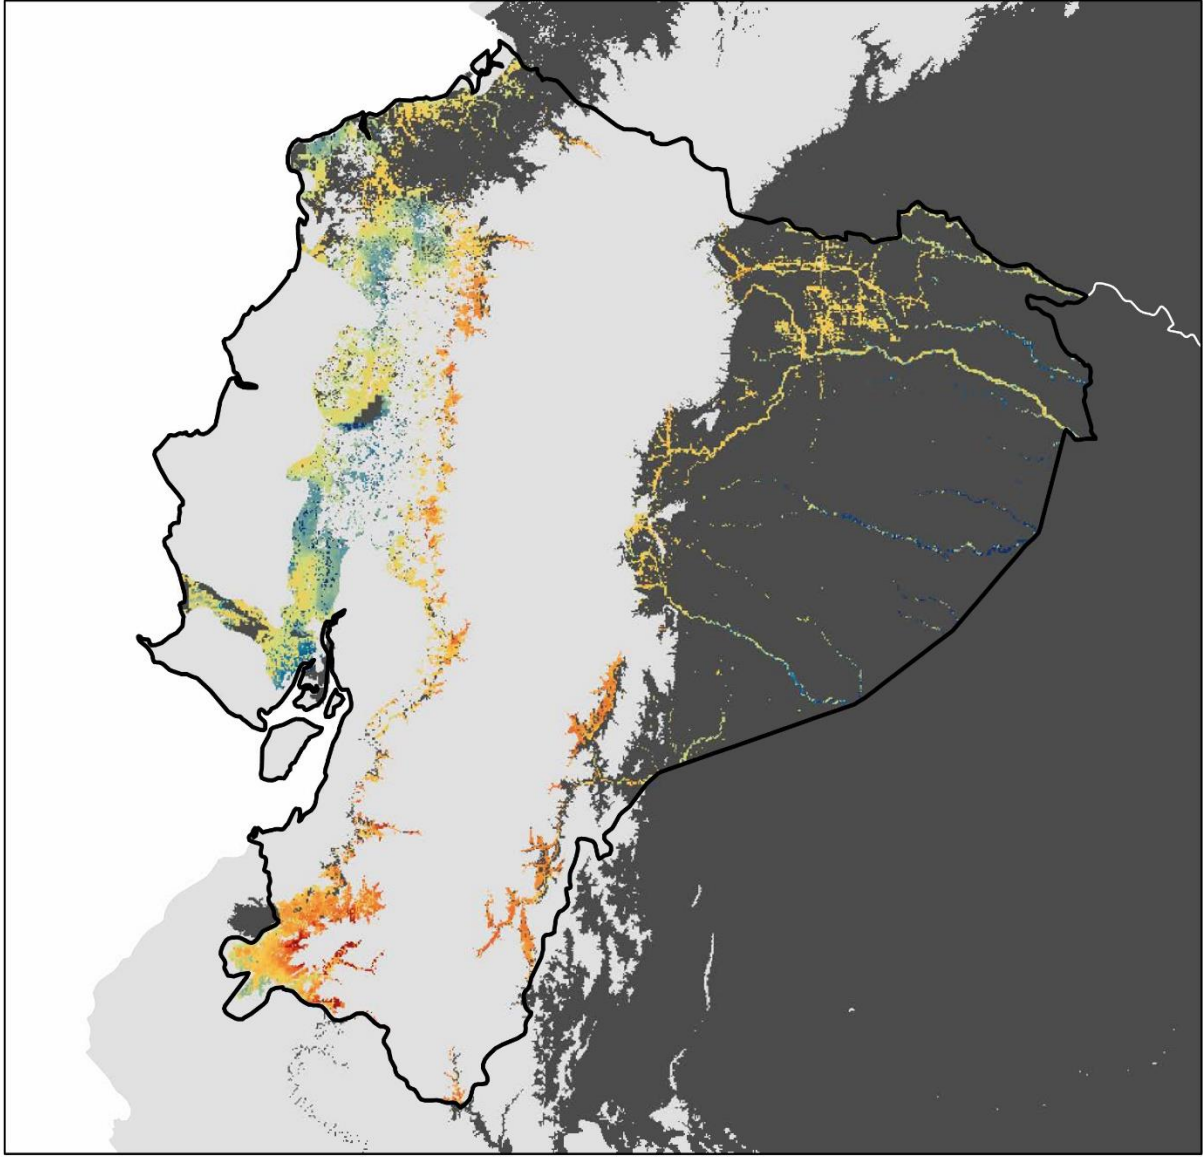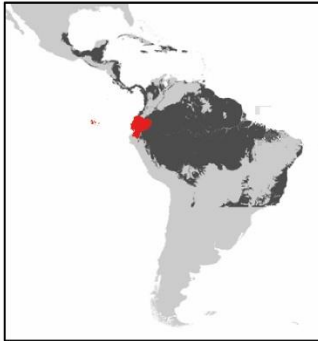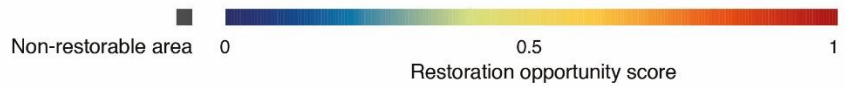

Non-restorable area

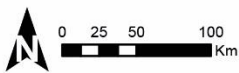



# Equatorial Guinea

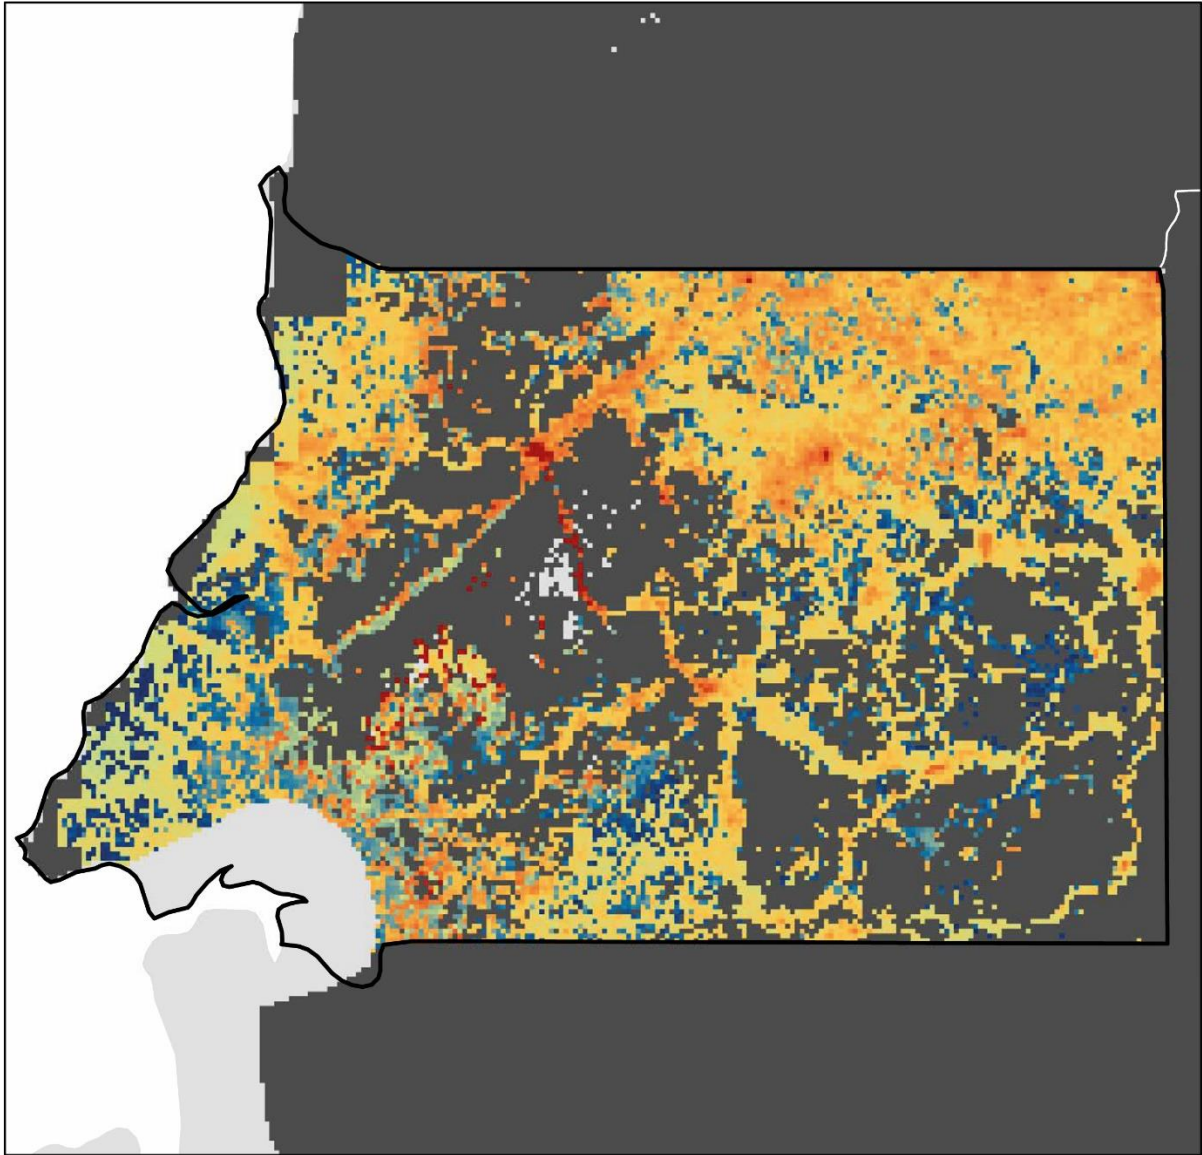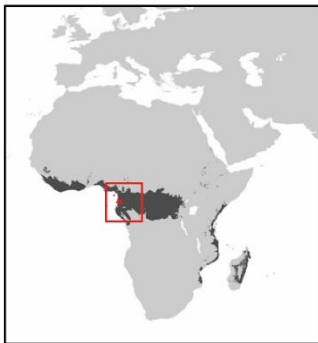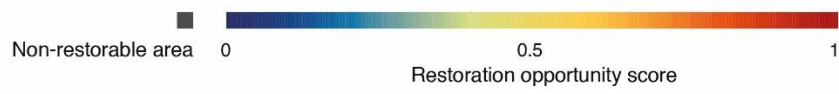

Equatorial Guinea

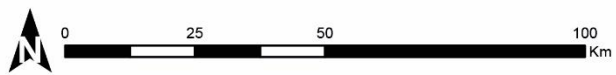

# Ethiopia

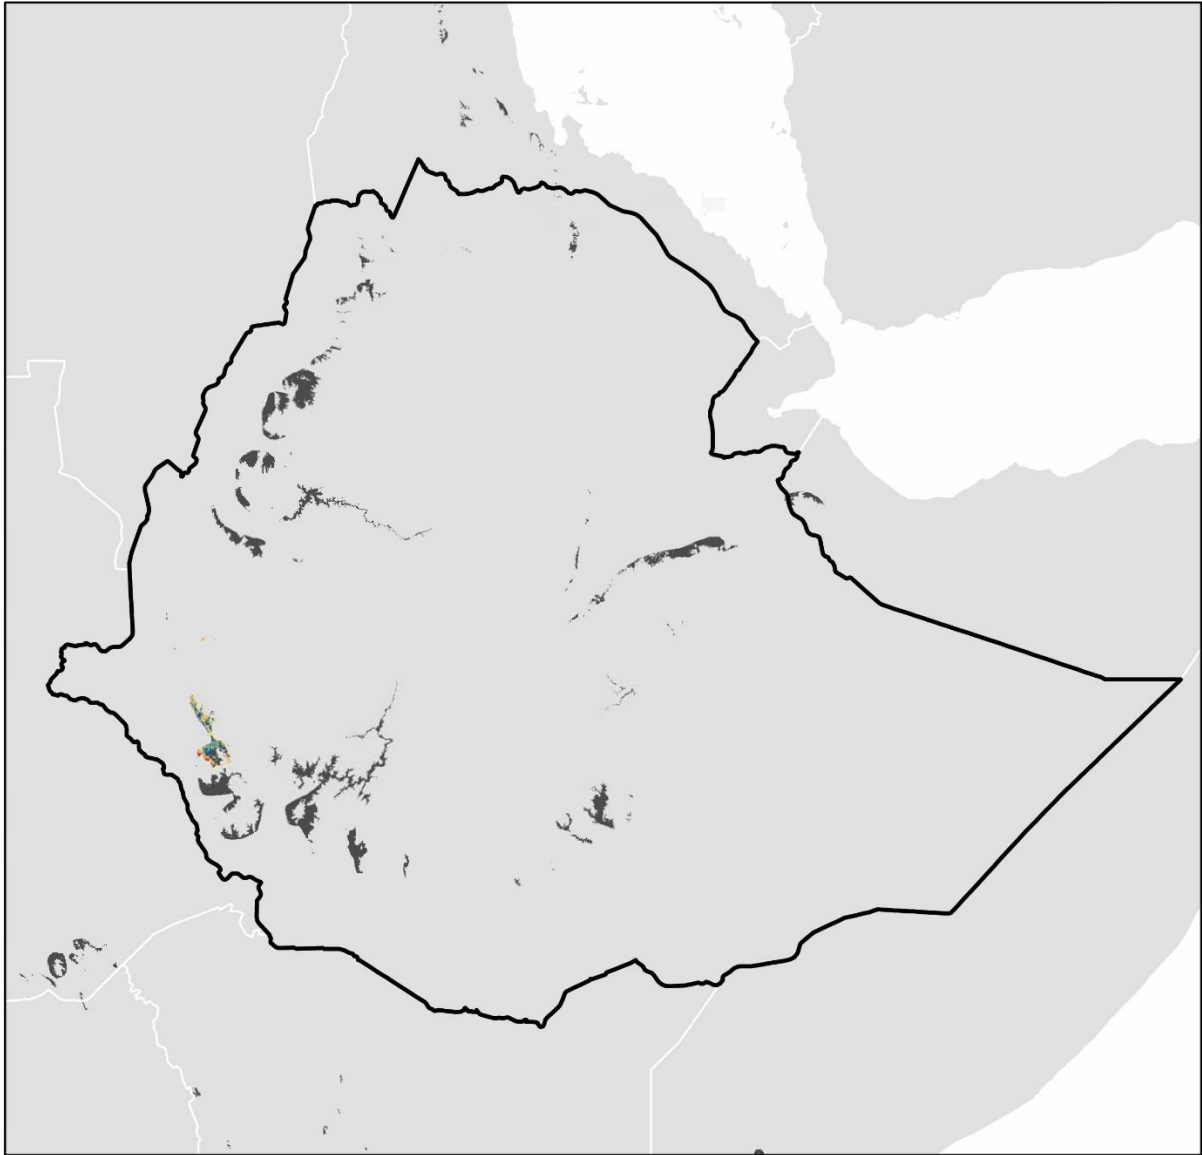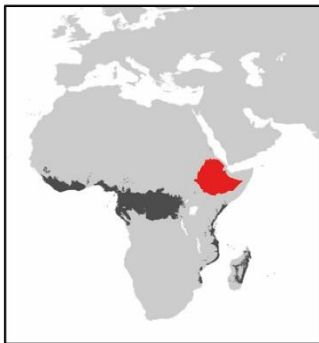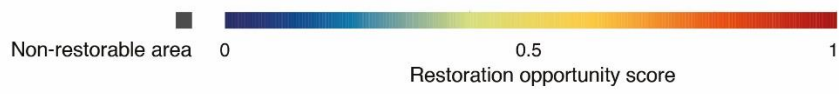

 Ethiopia

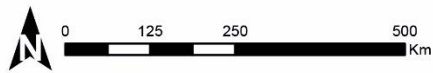

# Gabon

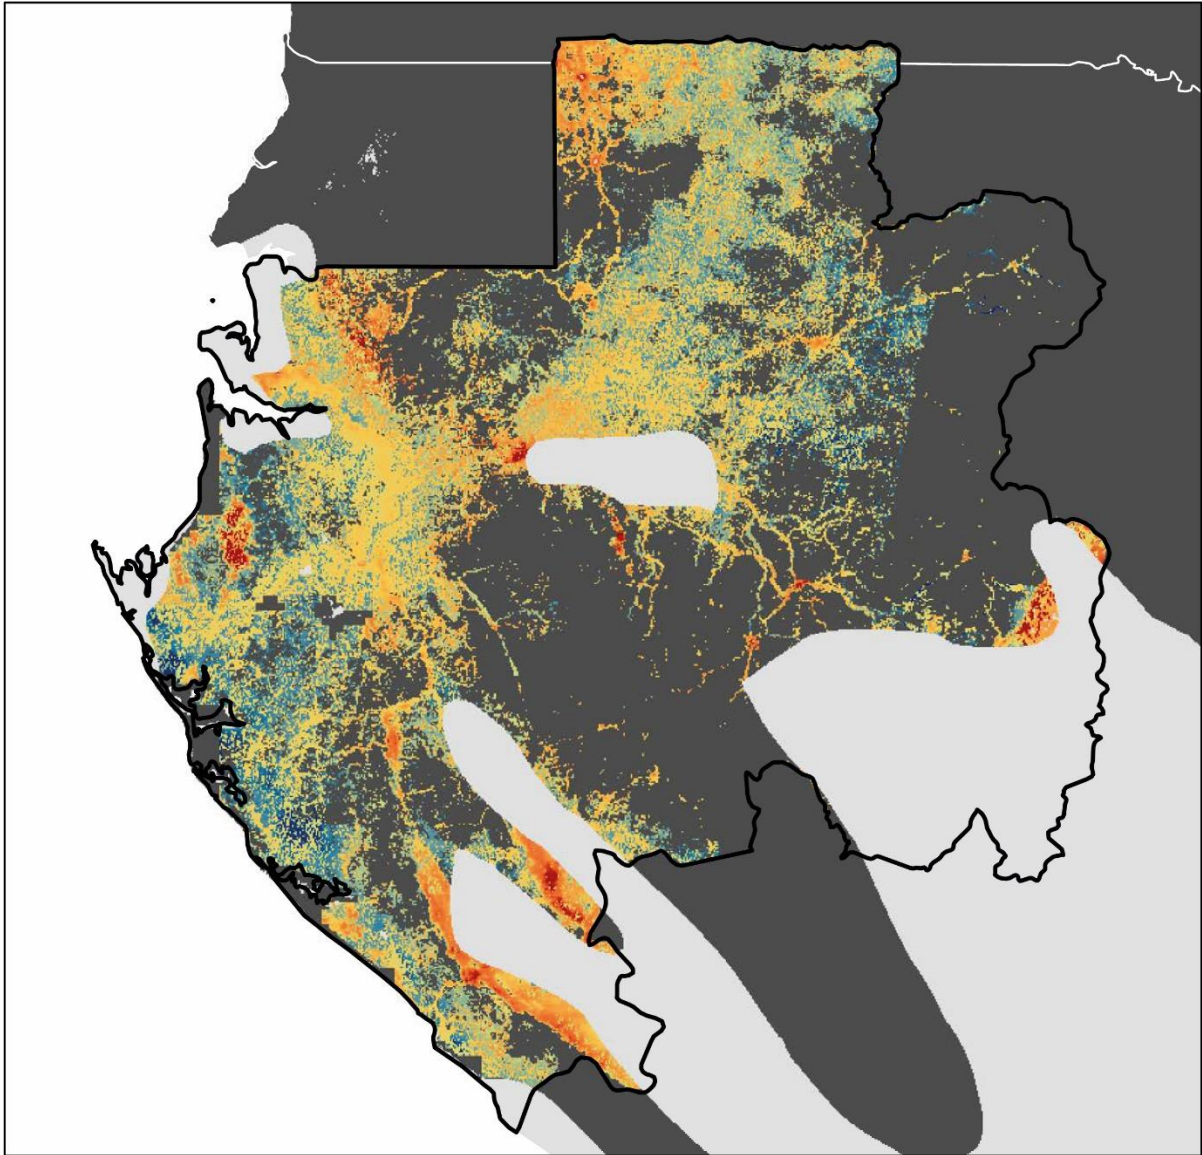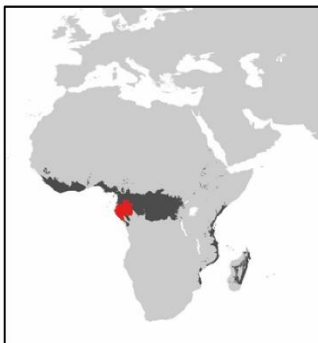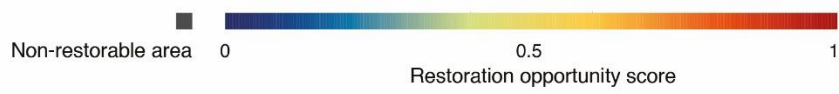

 Gabon

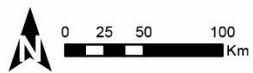

# Ghana

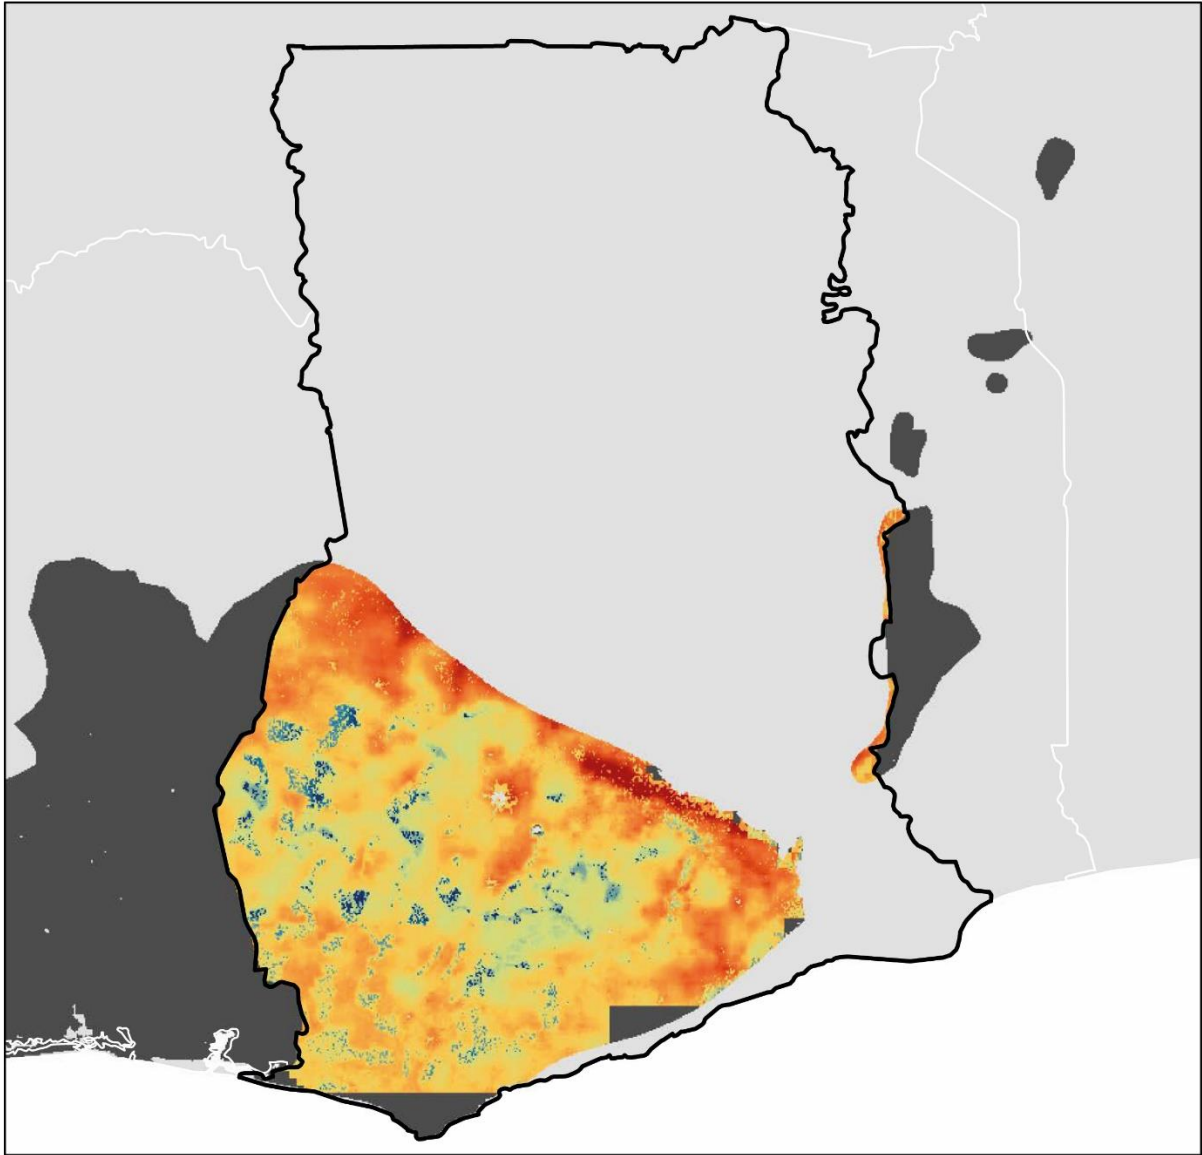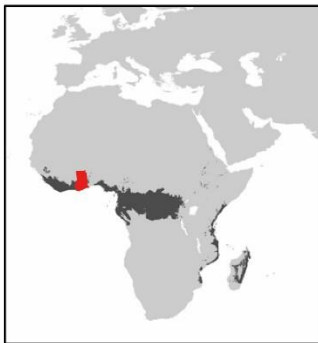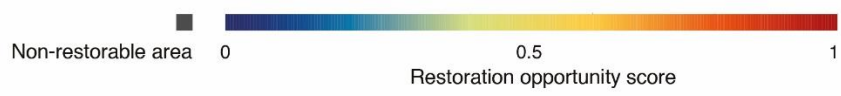

 Ghana

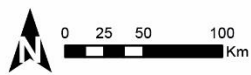



# Guatemala

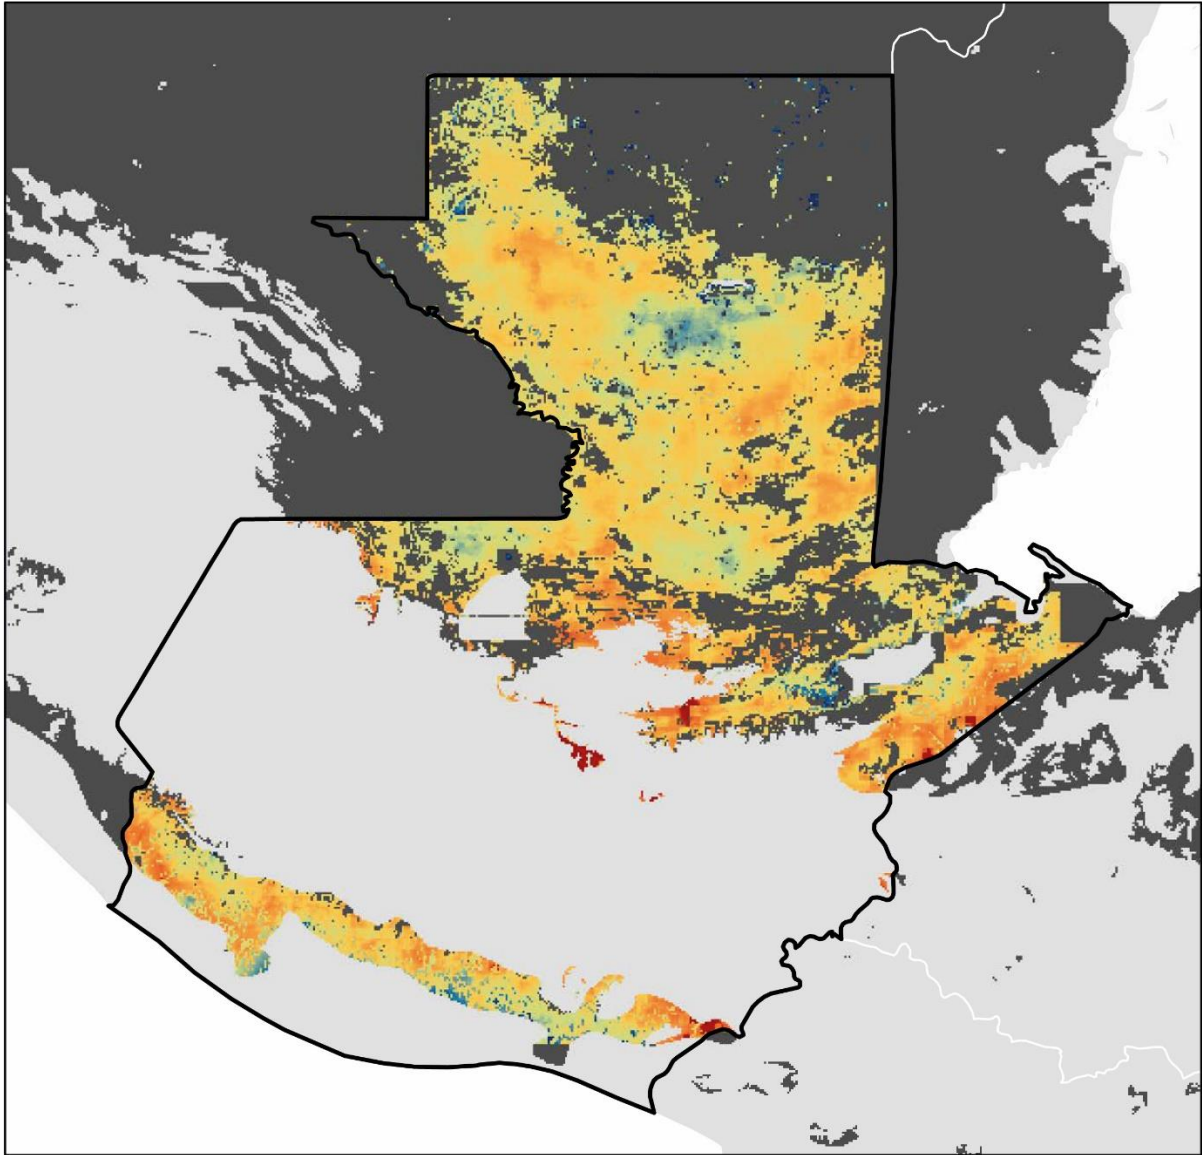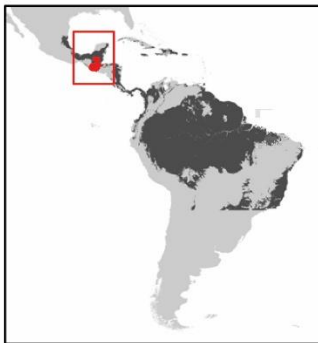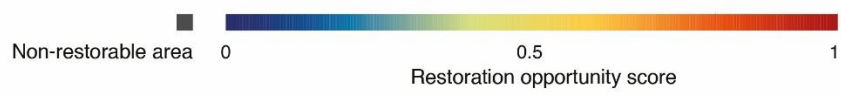

Guatemala

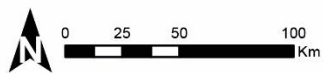

# Guinea

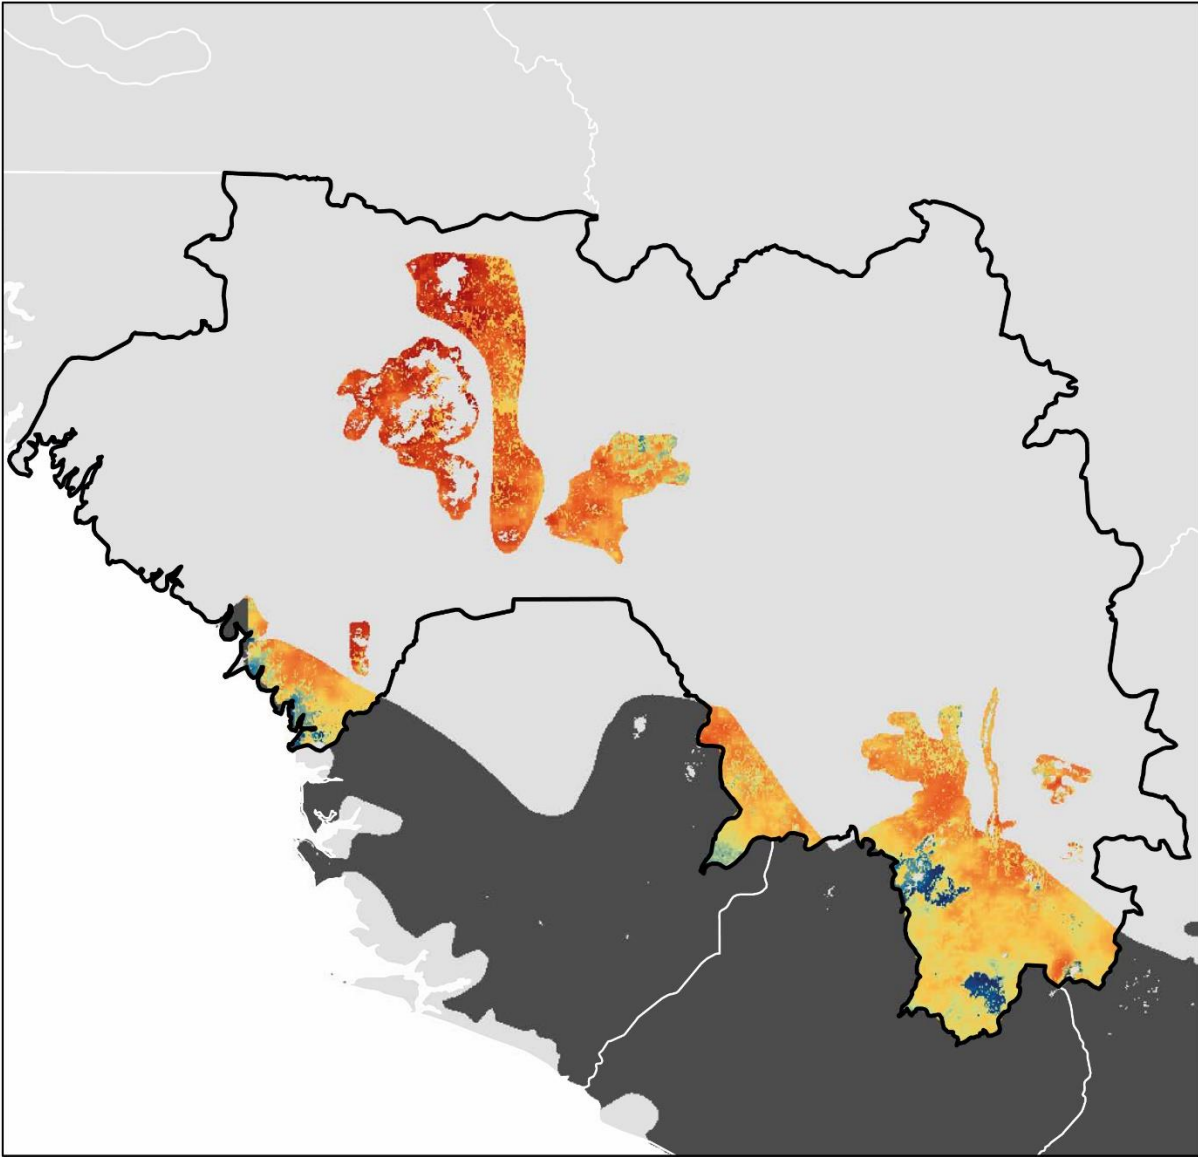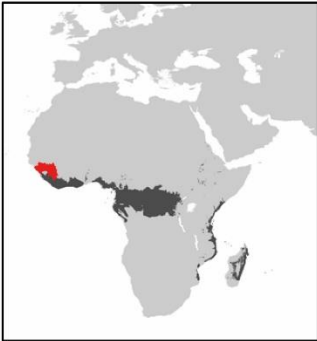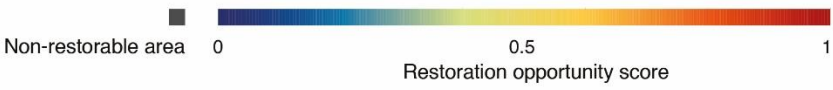

Guinea

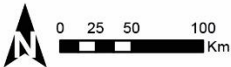

# Guyana

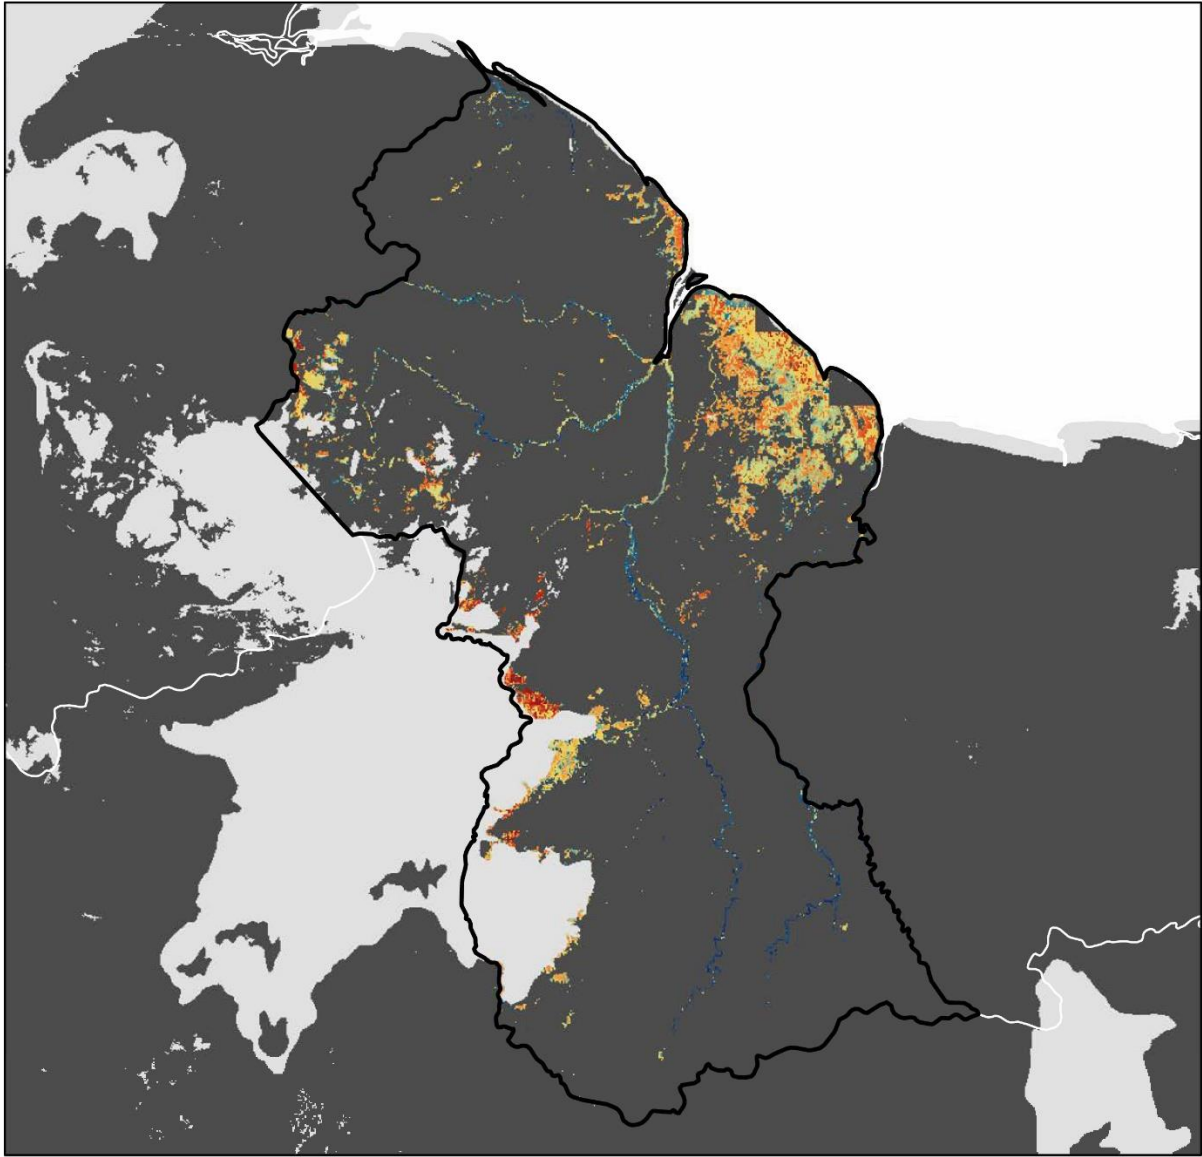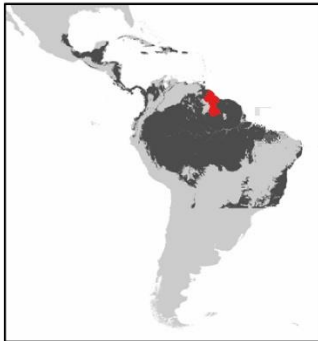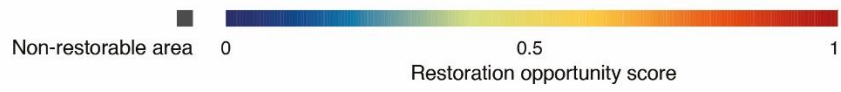

 Guyana

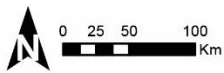

# Haiti

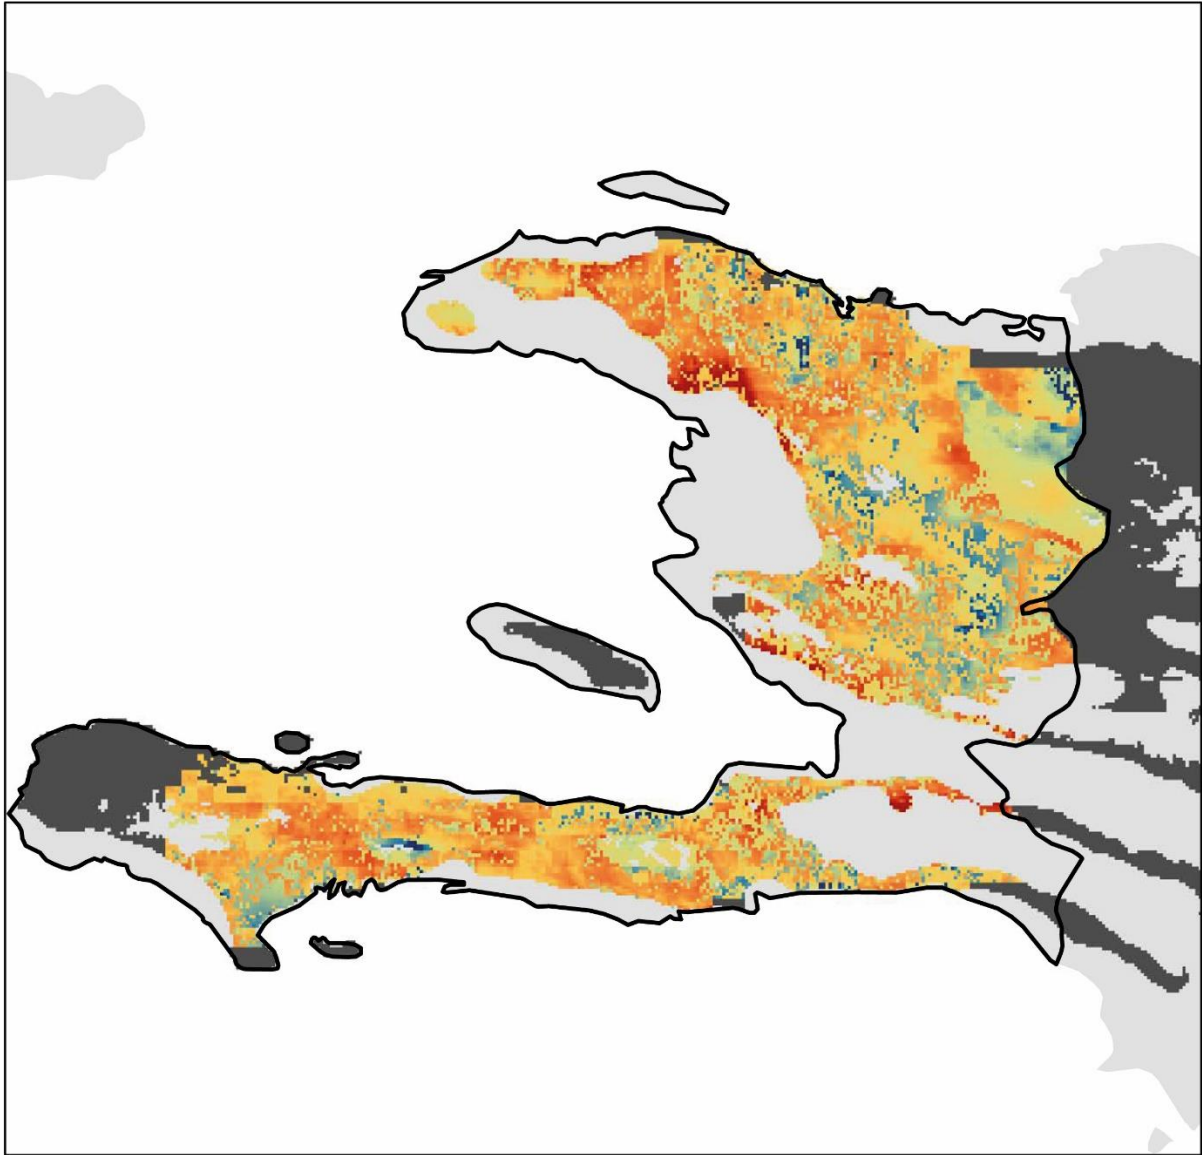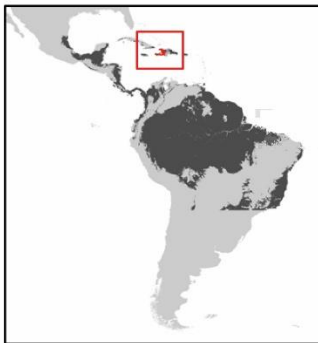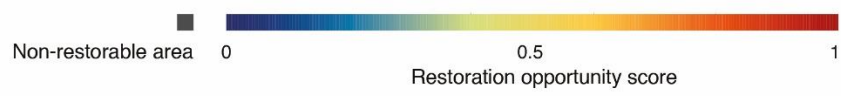

Haiti

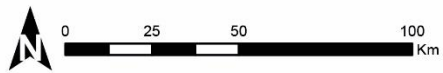



# Honduras

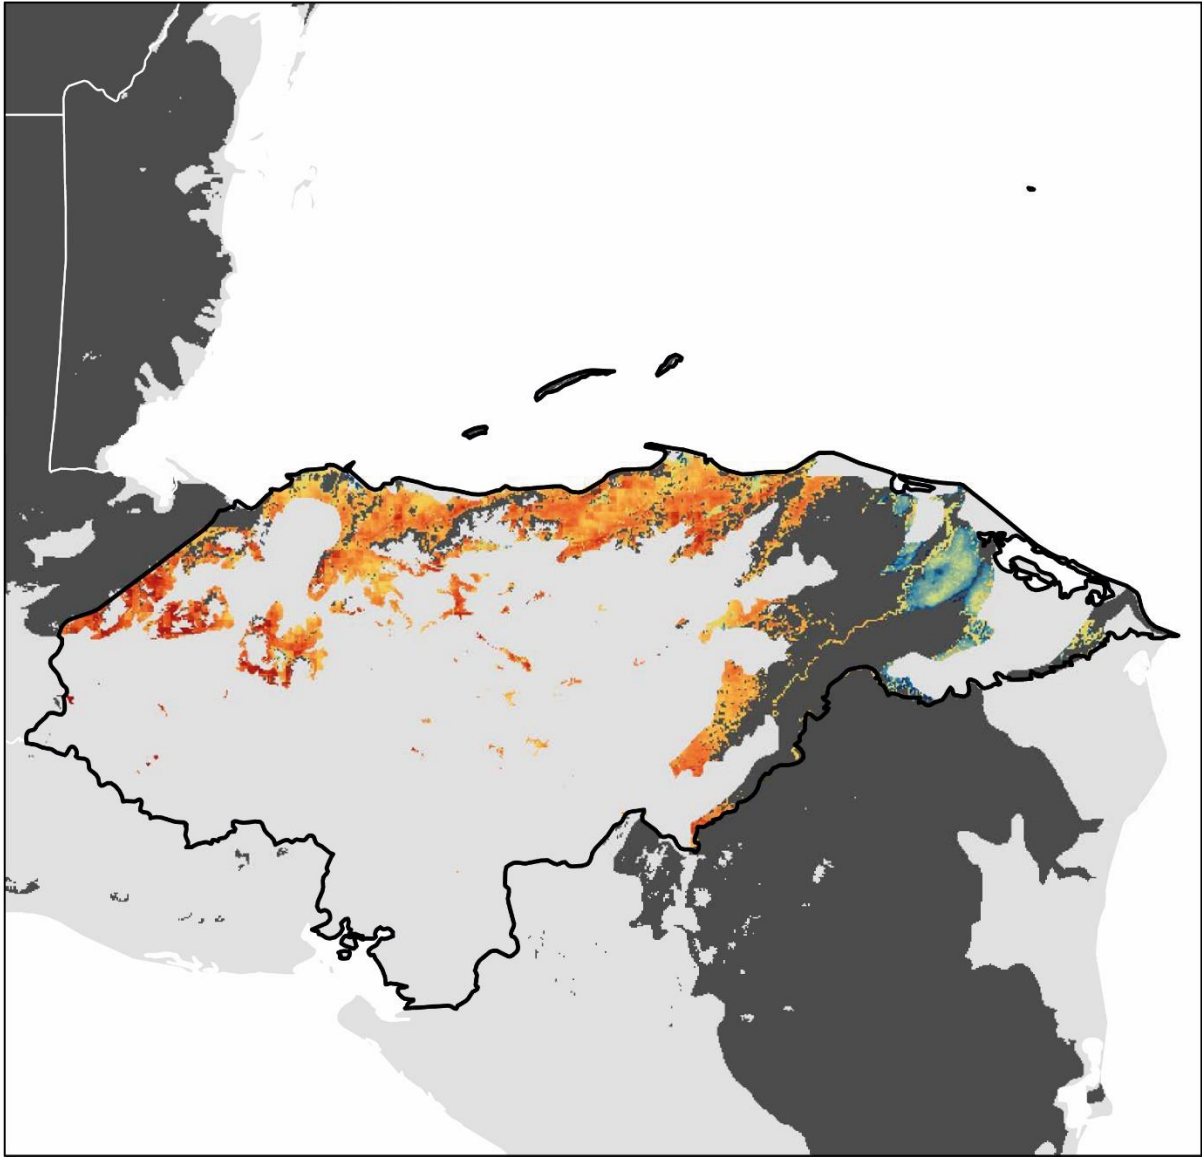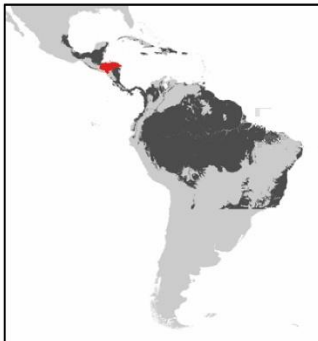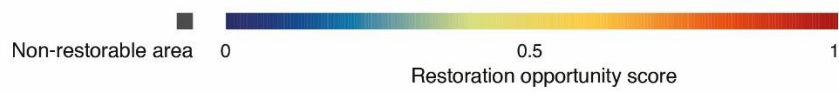

Non-restorable area 0

Restoration opportunity score 1

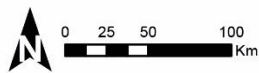

# India

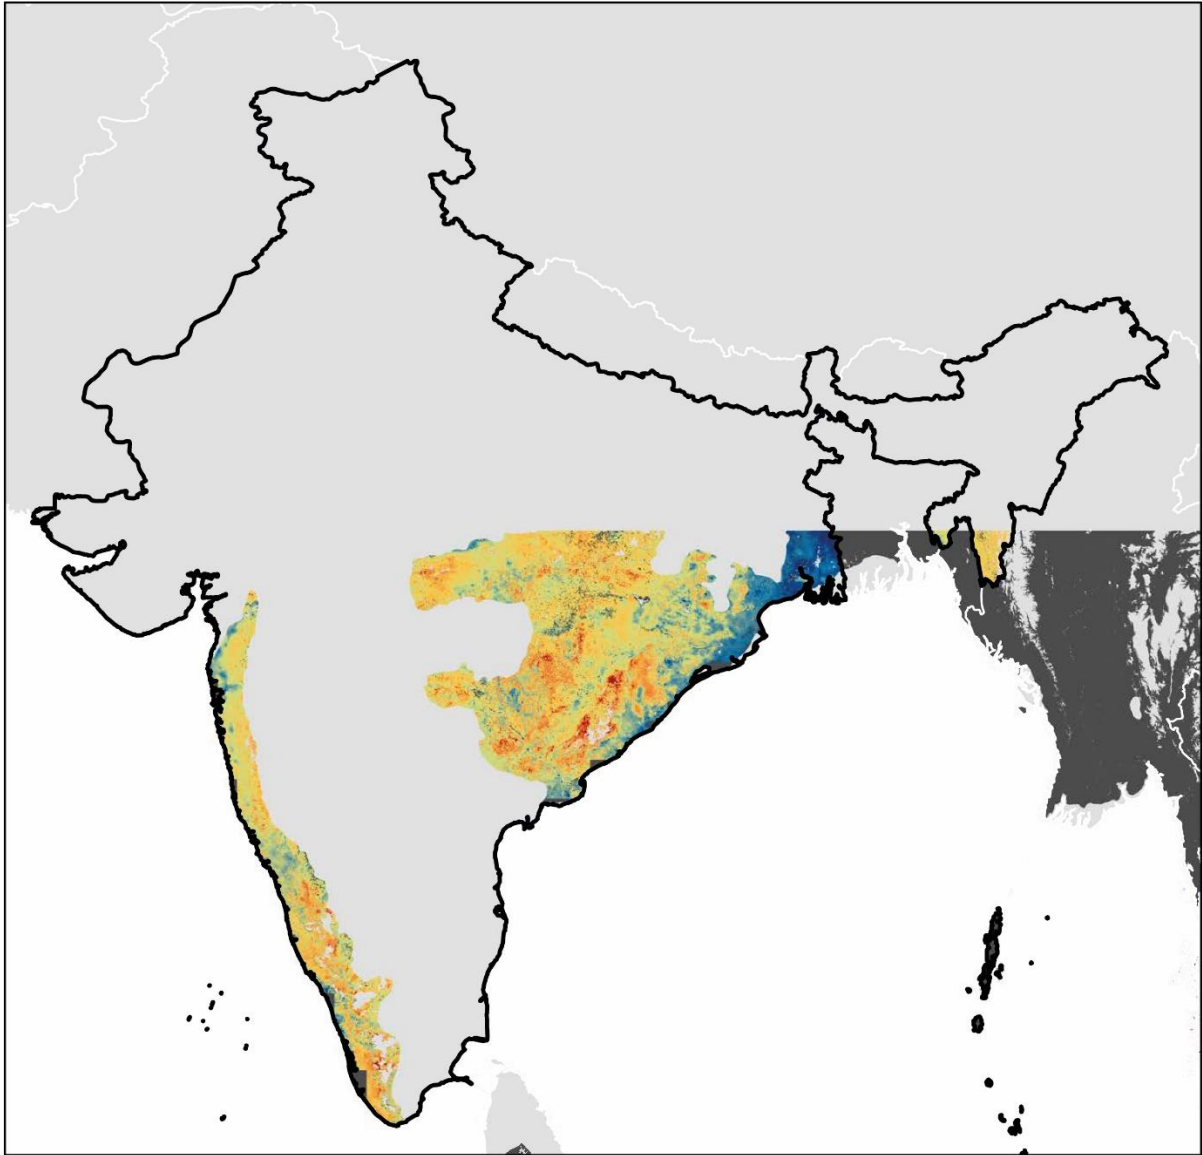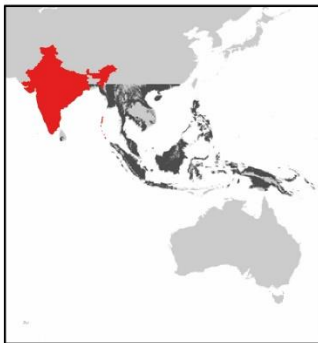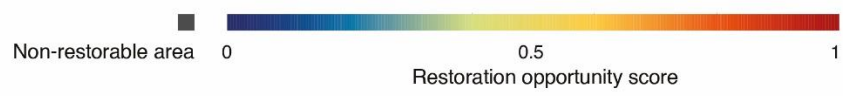

India

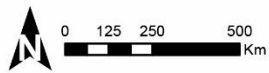

# Indonesia

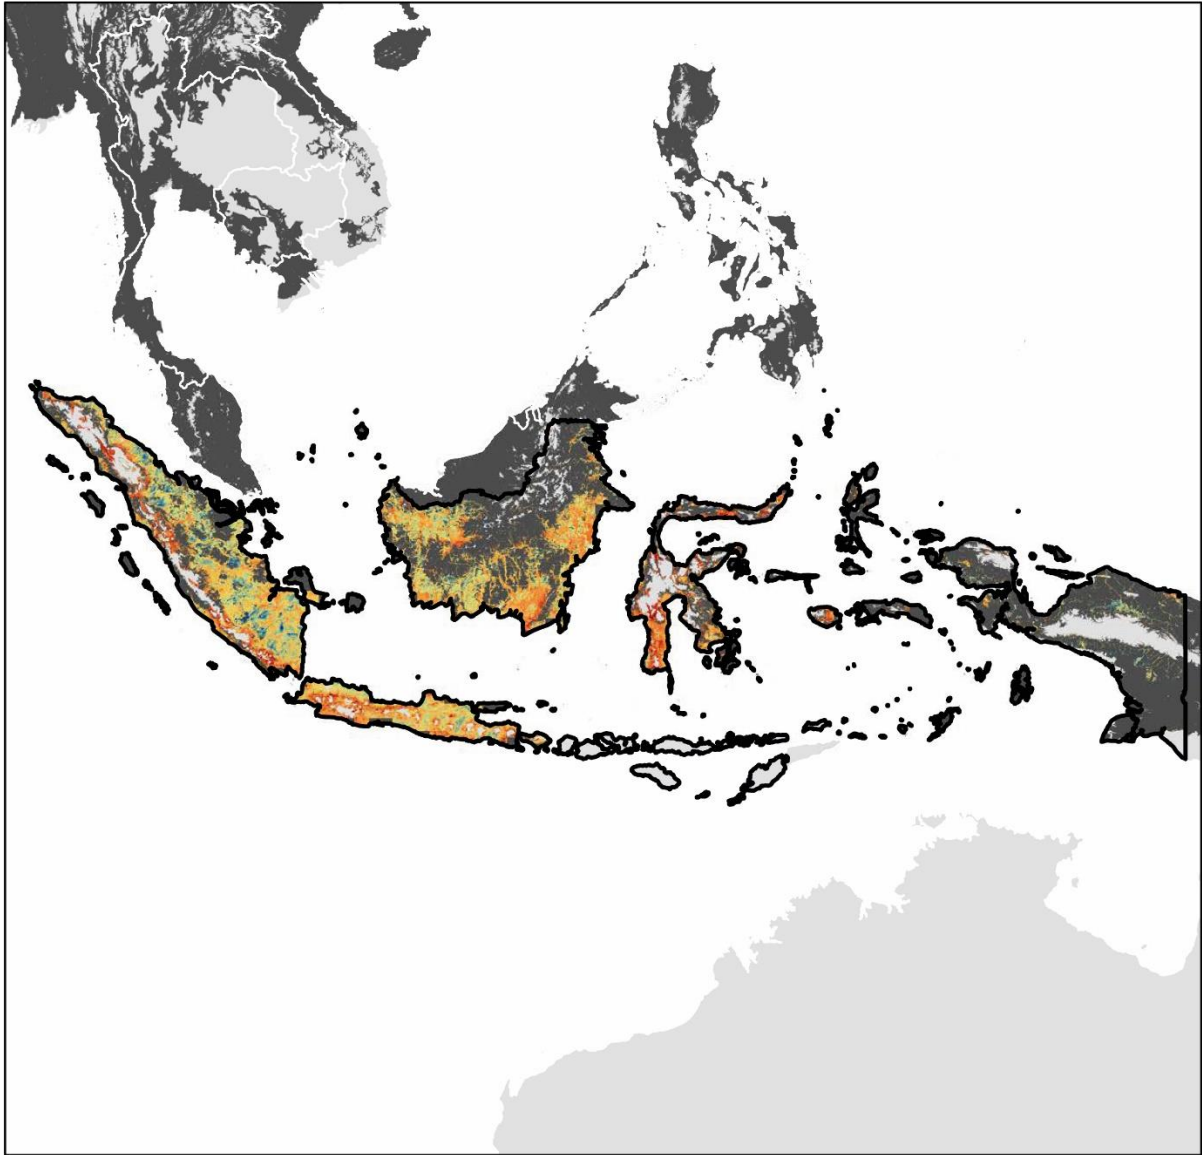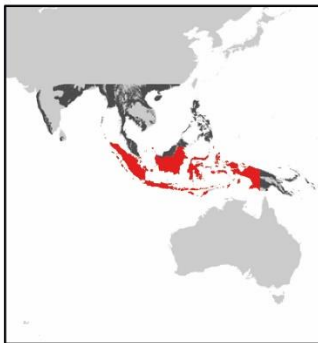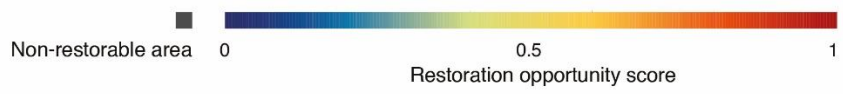

Indonesia

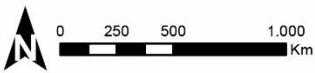

# Ivory Coast

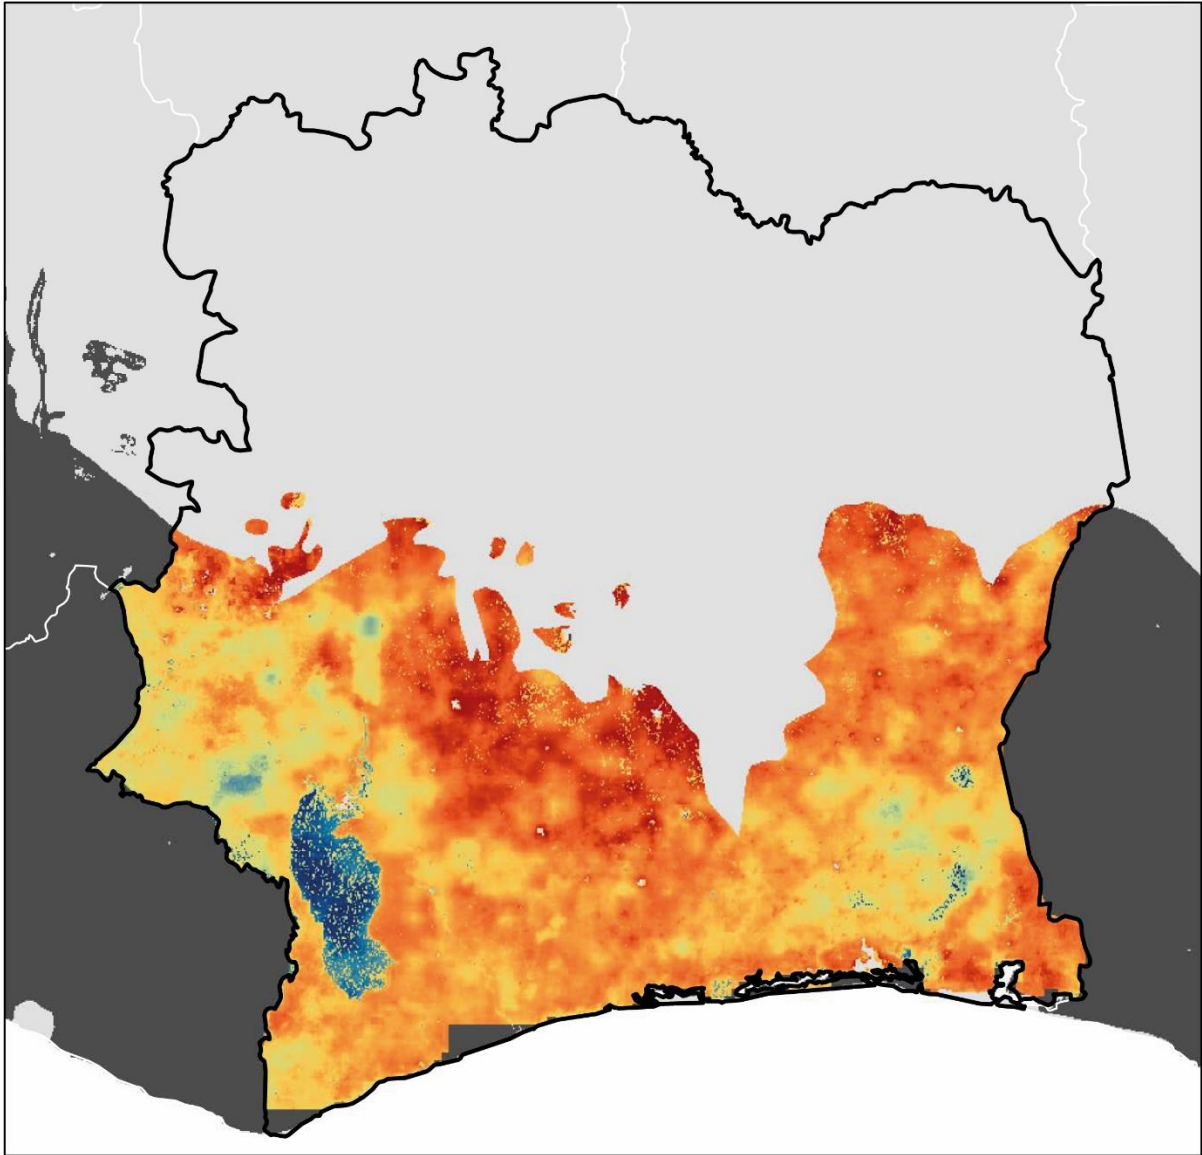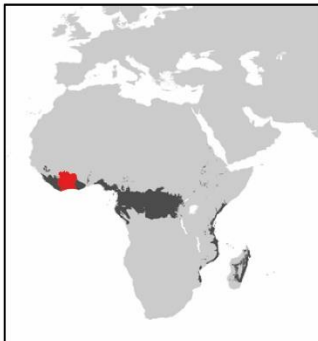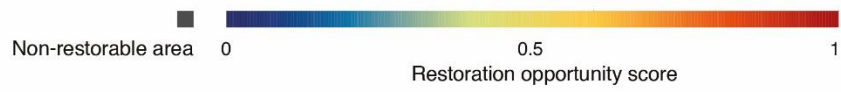

■ Non-restorable area 0

■ Ivory Coast

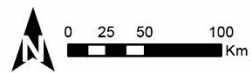

# Jamaica

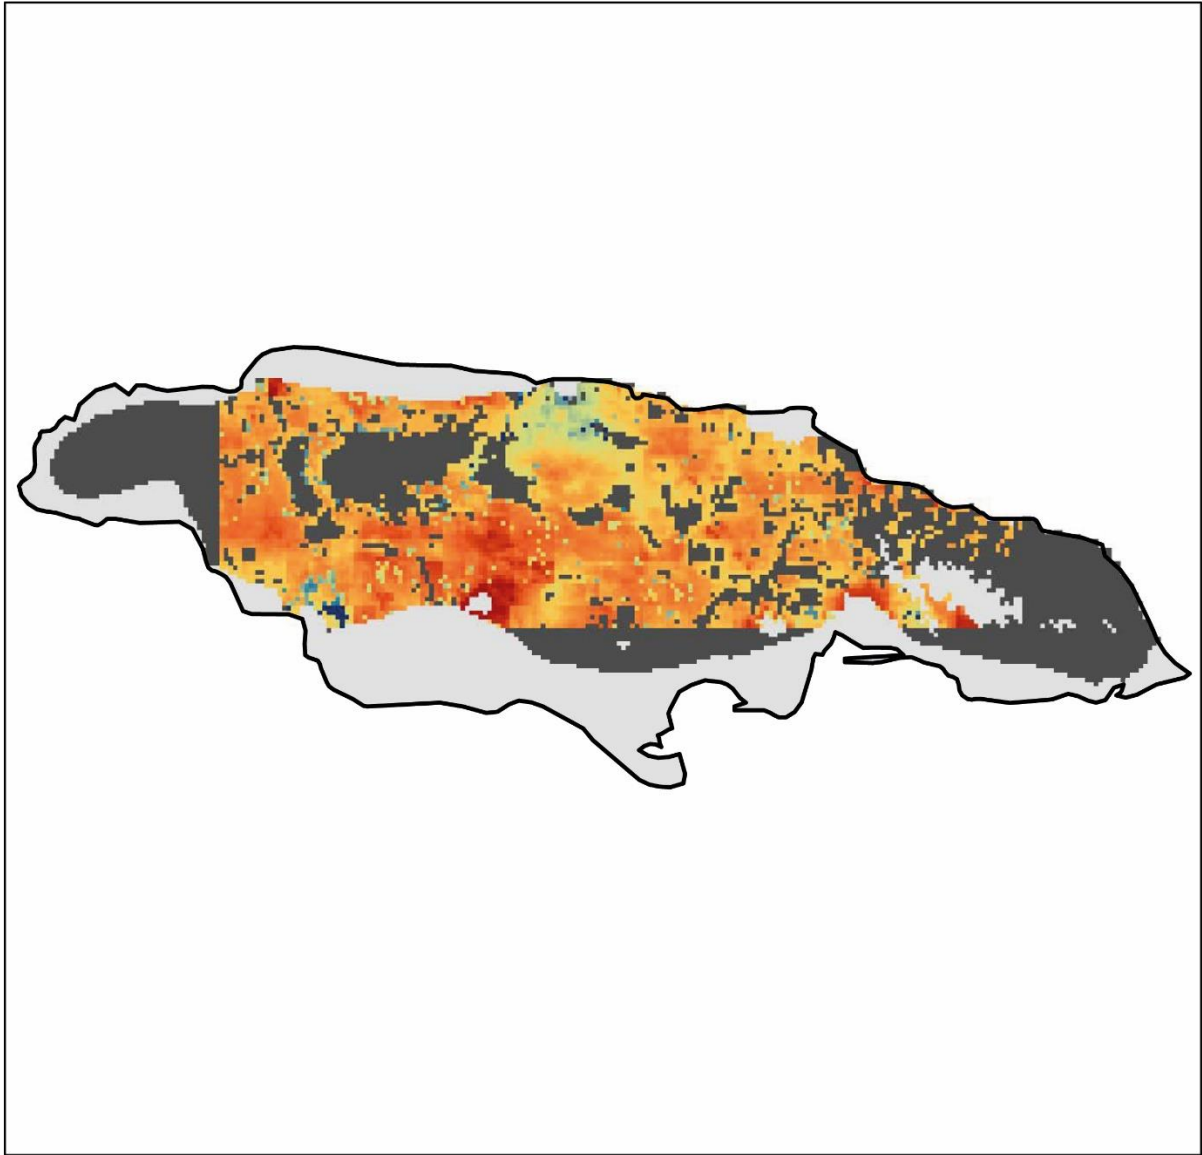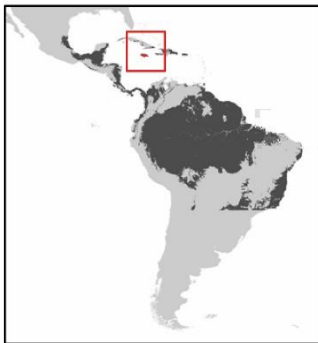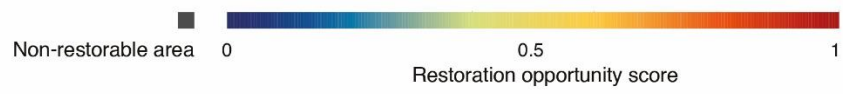

 Jamaica

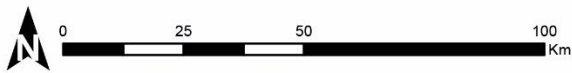

# Kenya

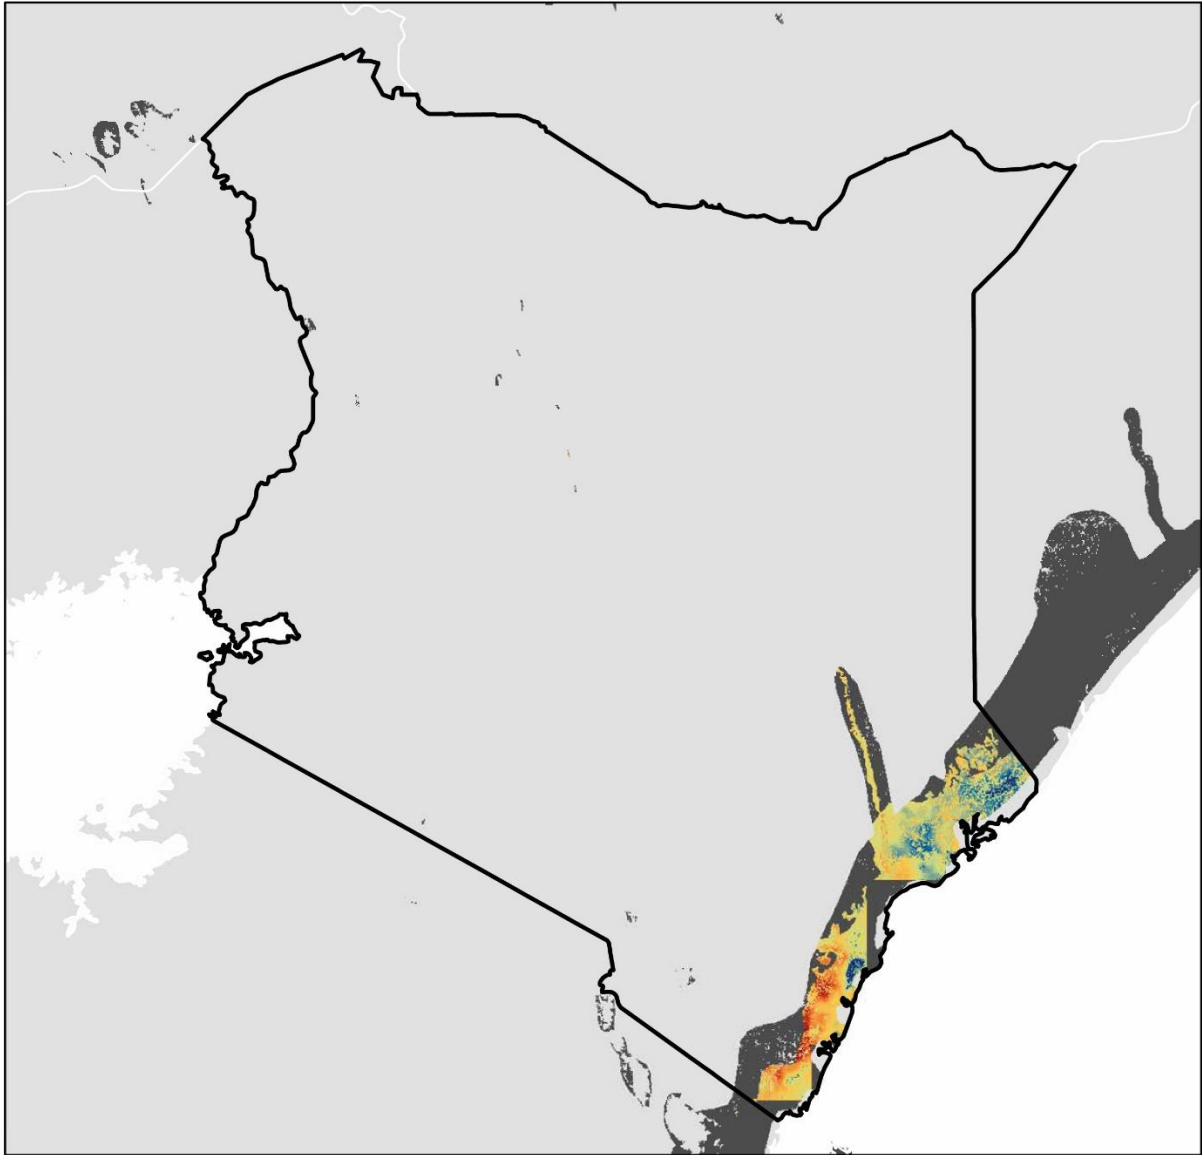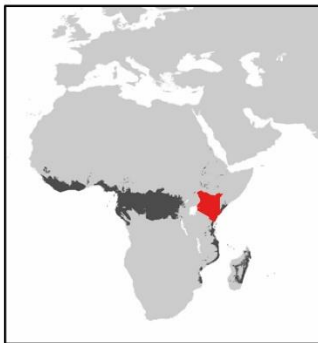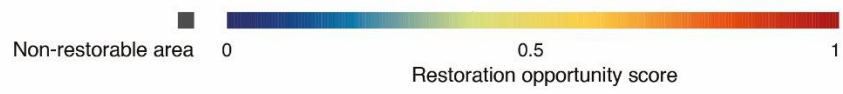

Non-restorable area  
 Kenya

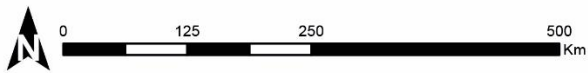



# Laos

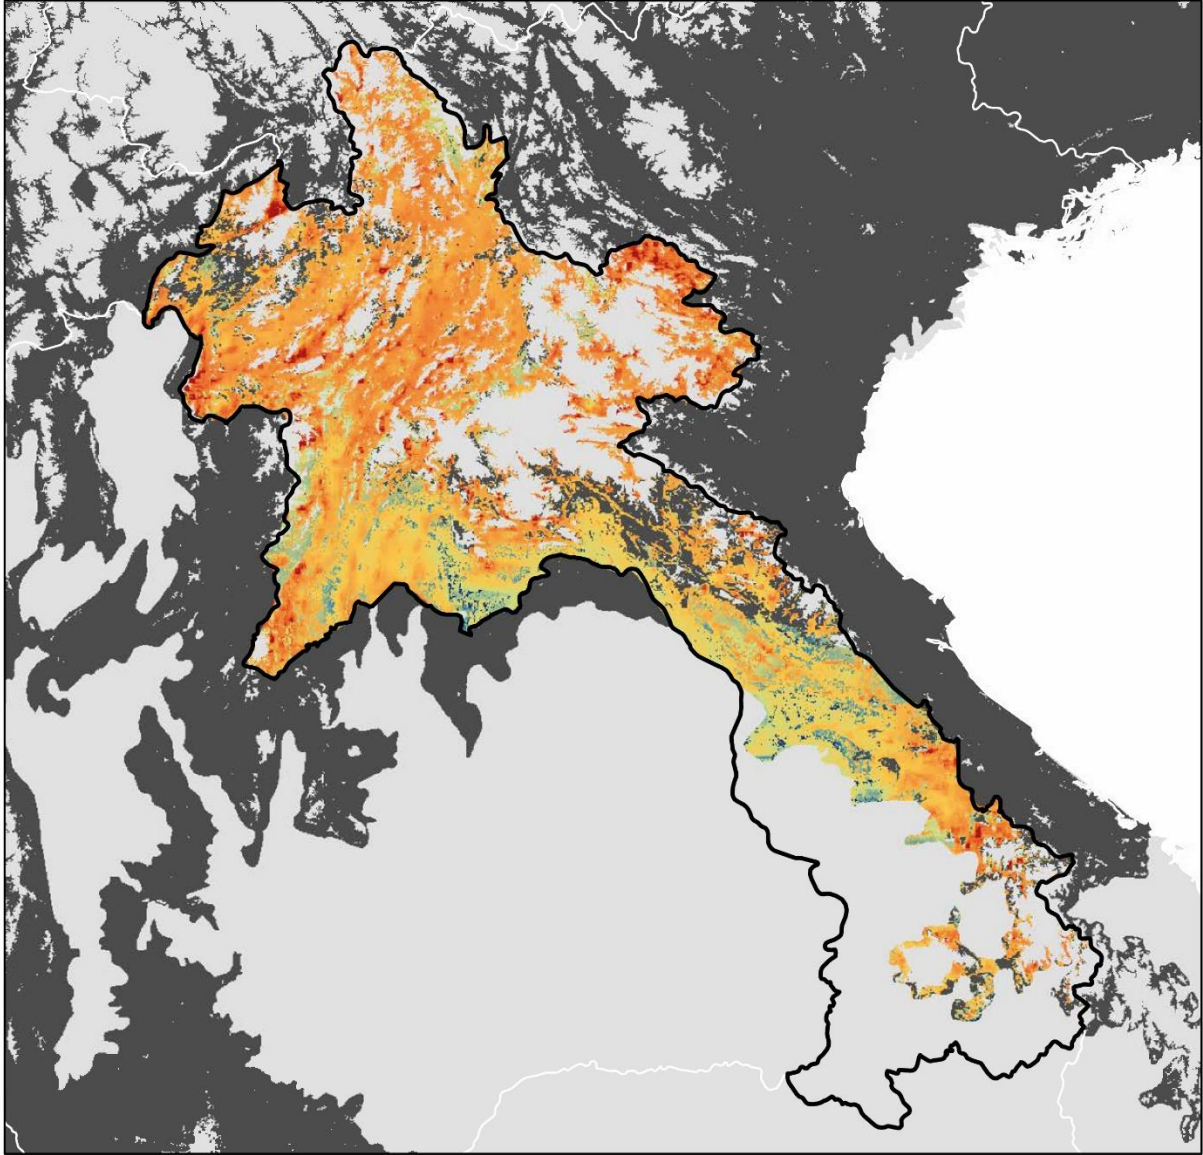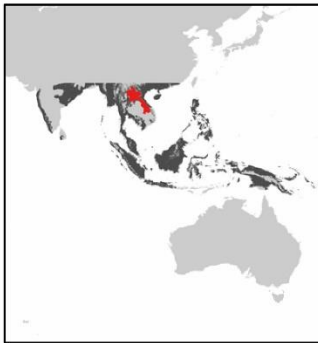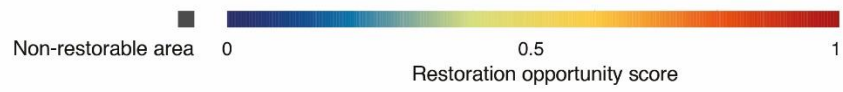

Laos

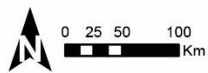

# Liberia

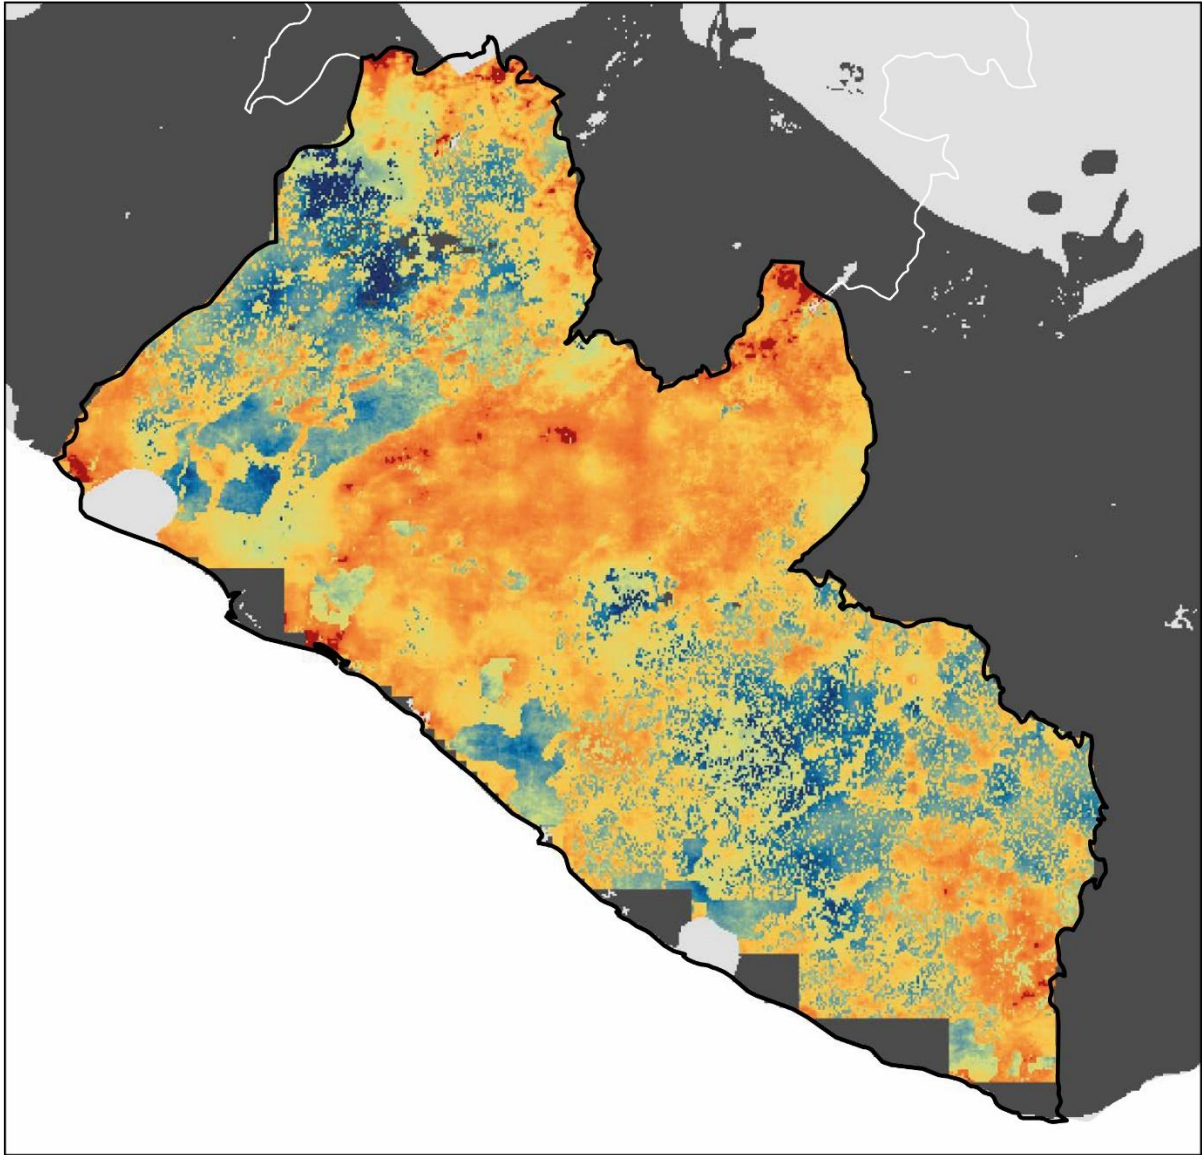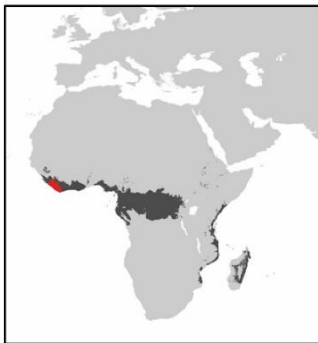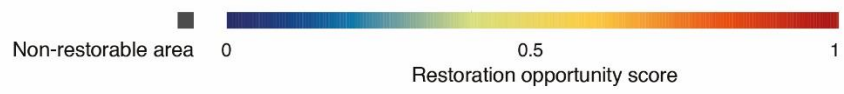

■ Liberia

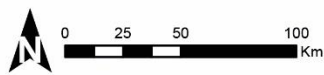



# Madagascar

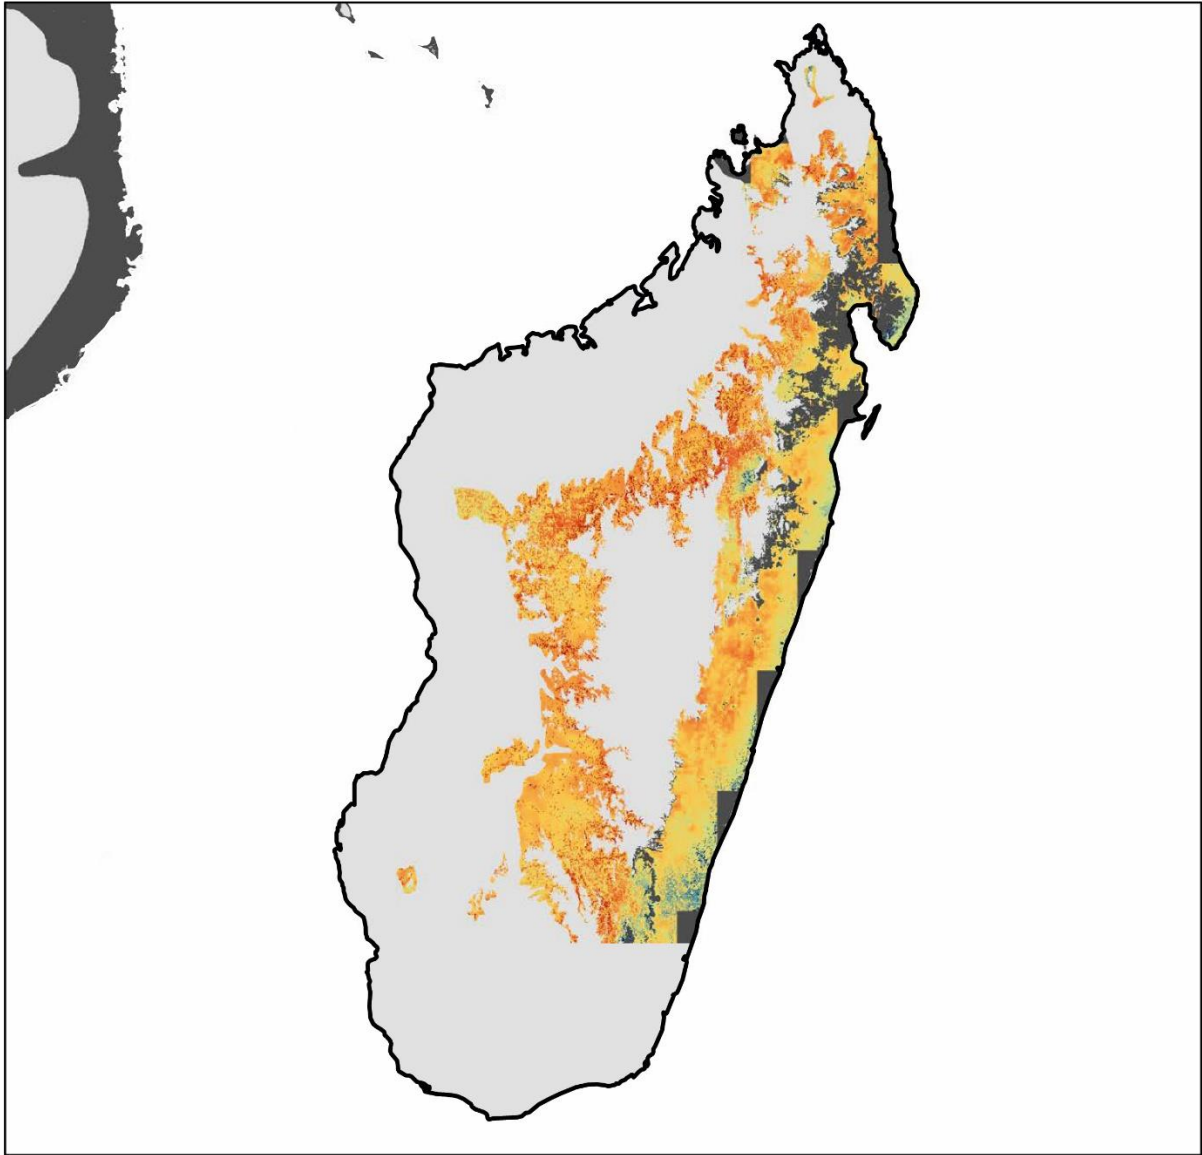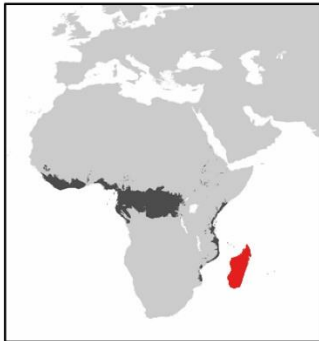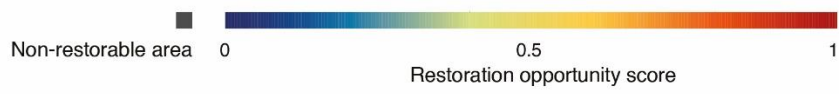

 Madagascar

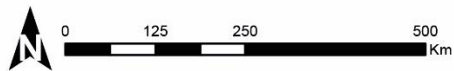

# Malaysia

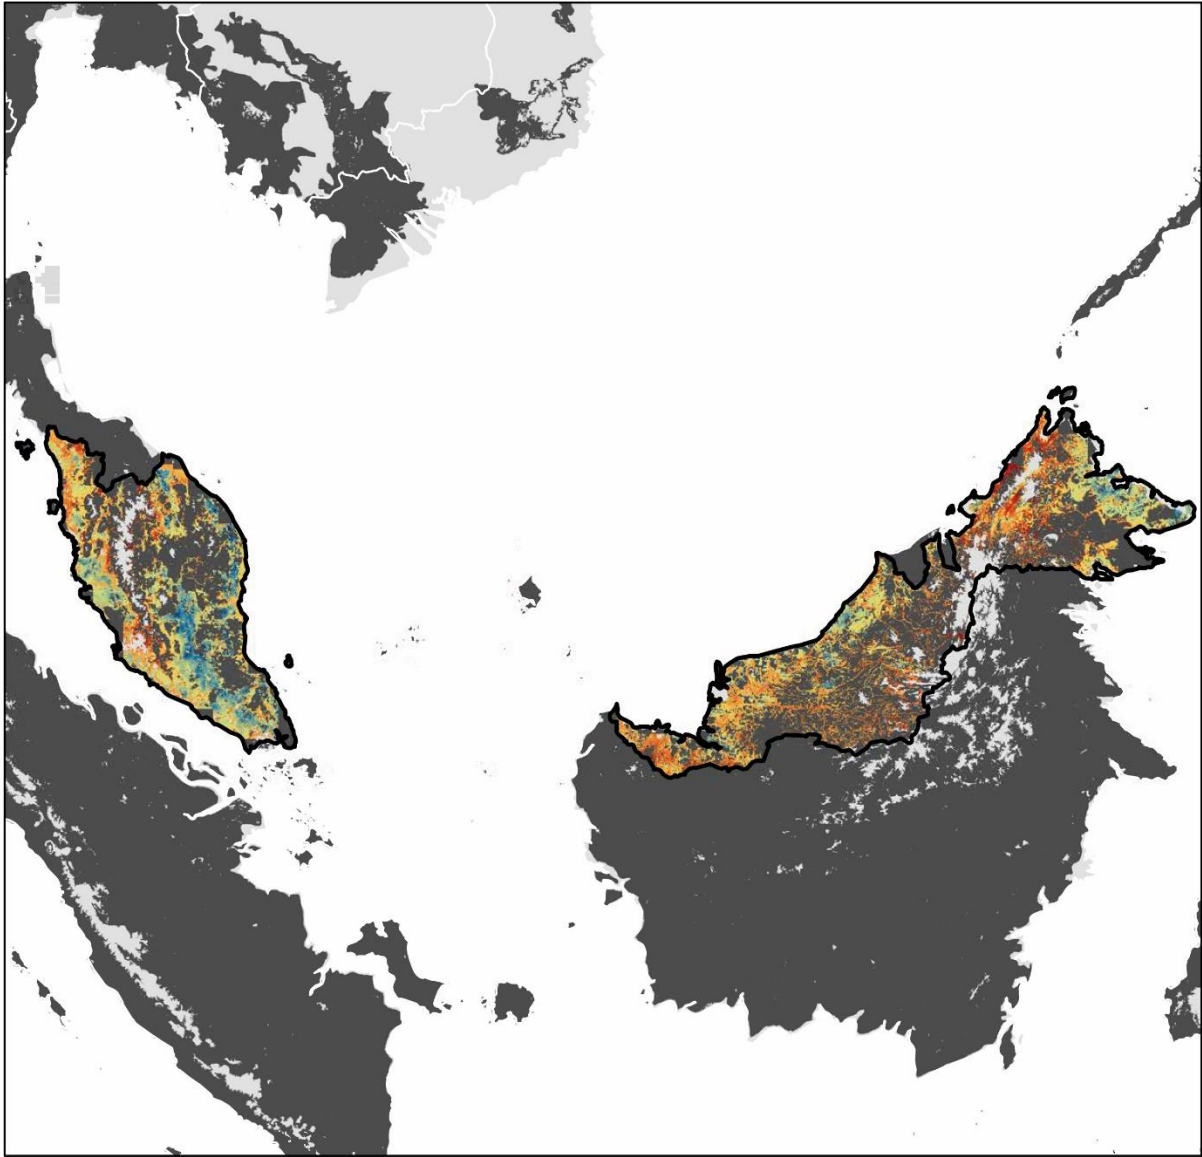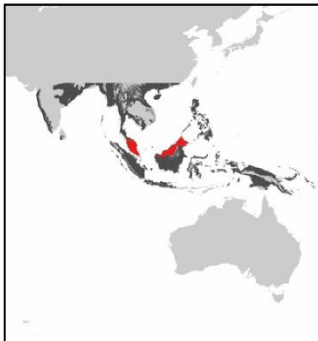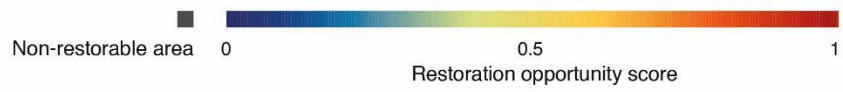

Malaysia

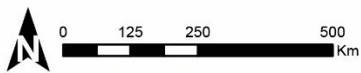

# Mexico

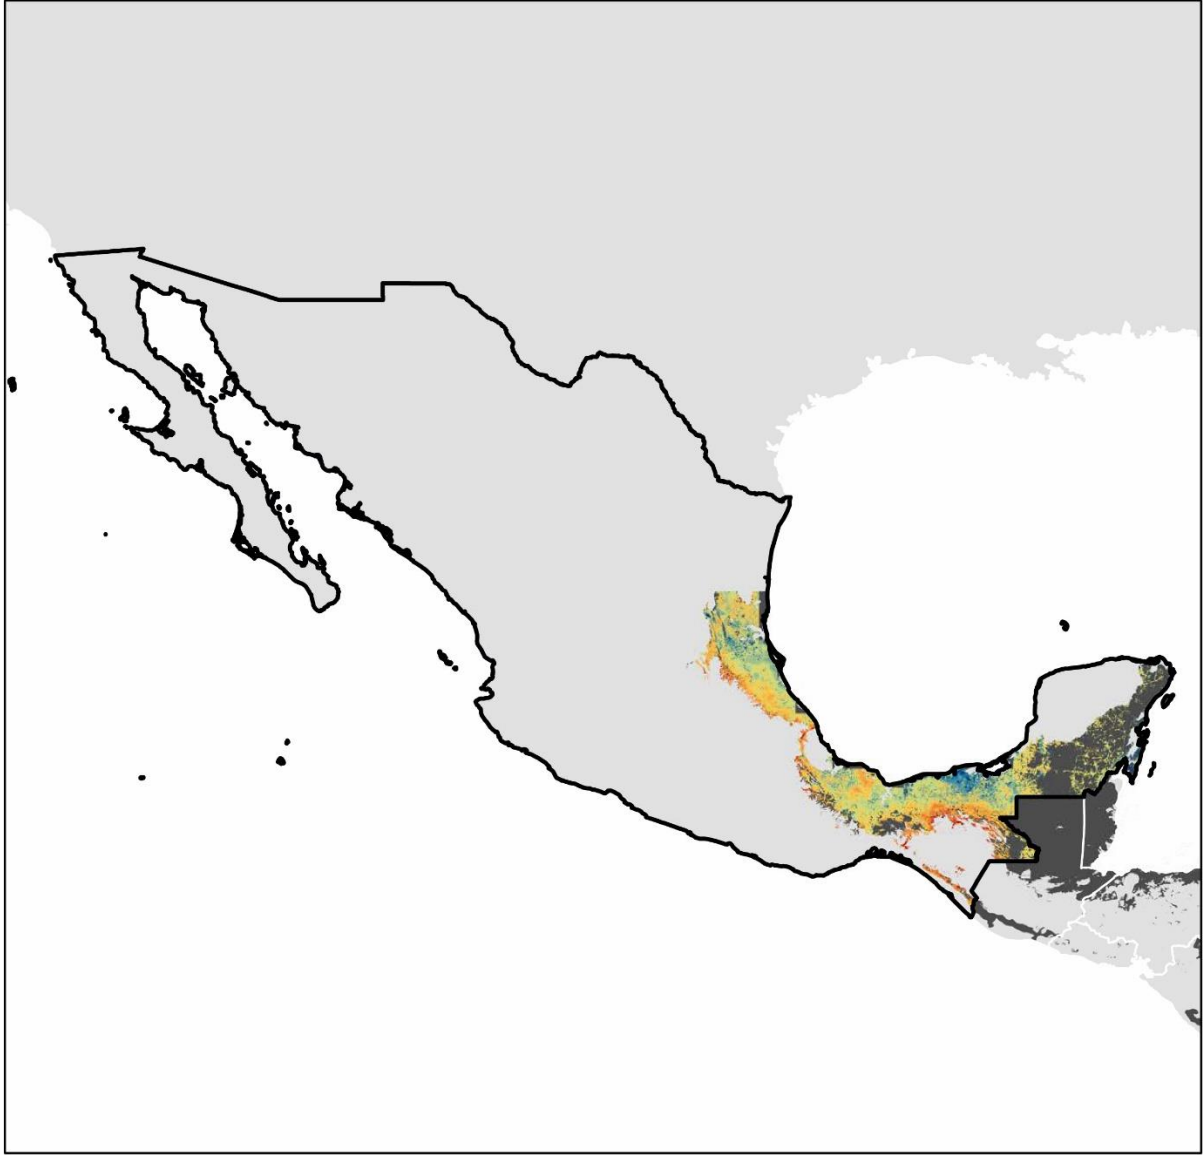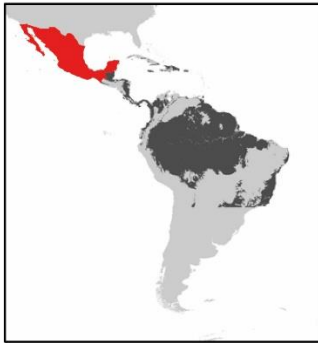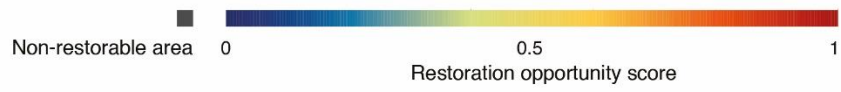

Mexico

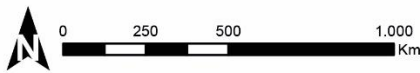

# Mozambique

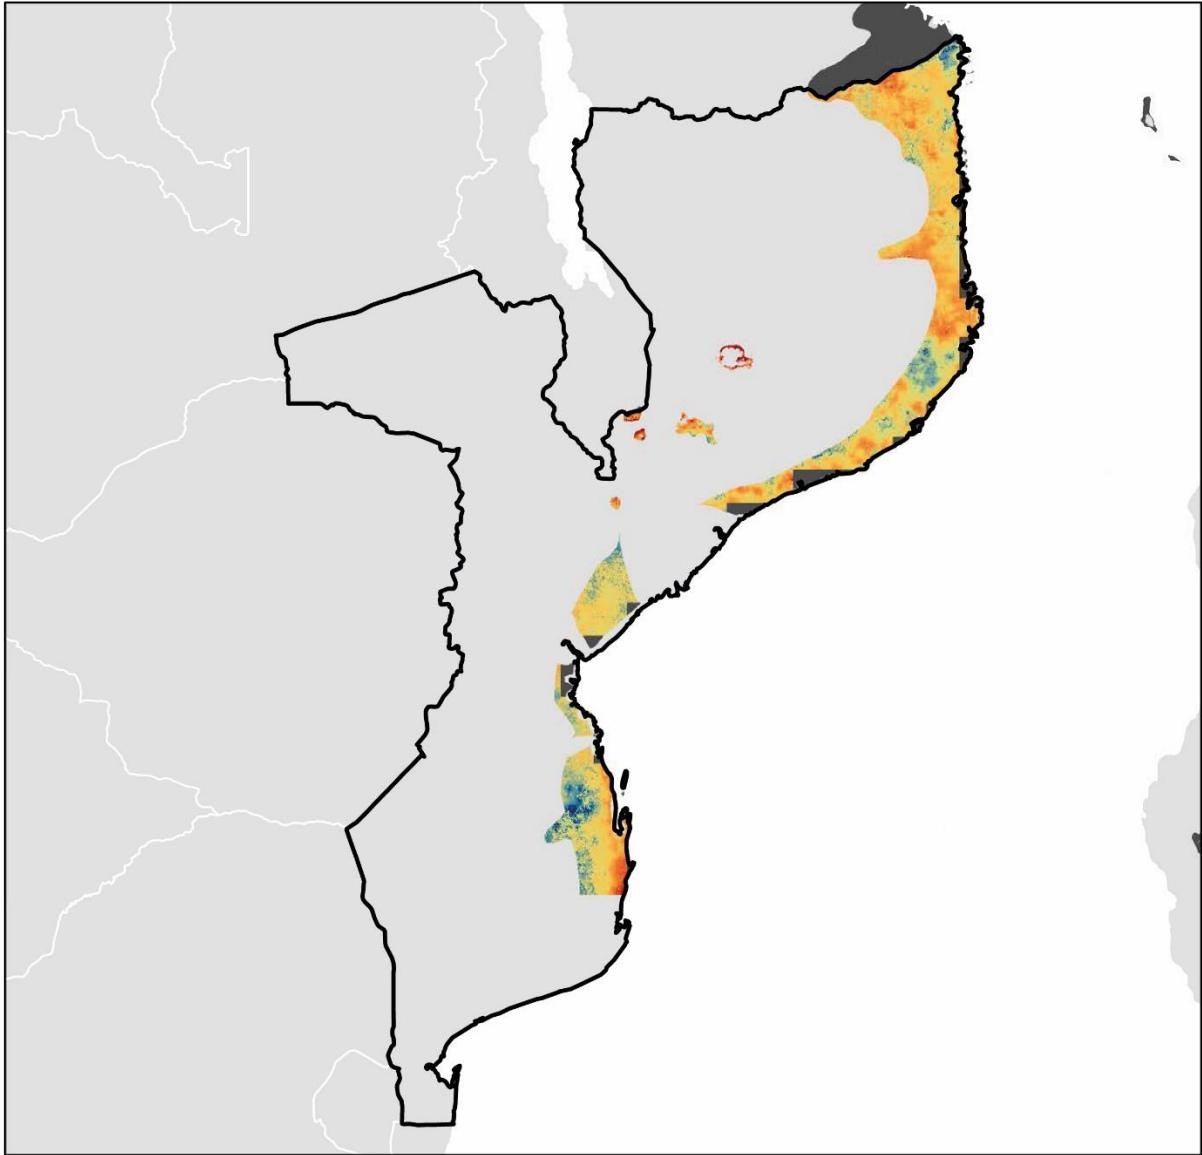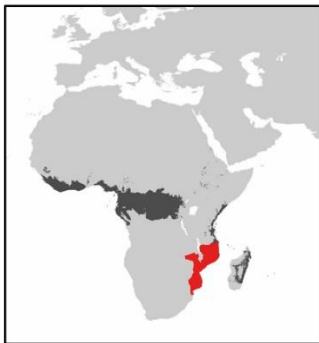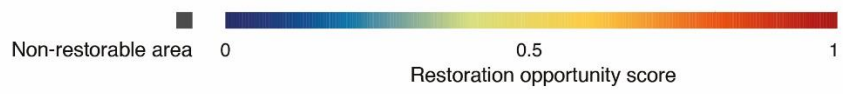

Mozambique

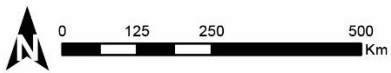

# Myanmar

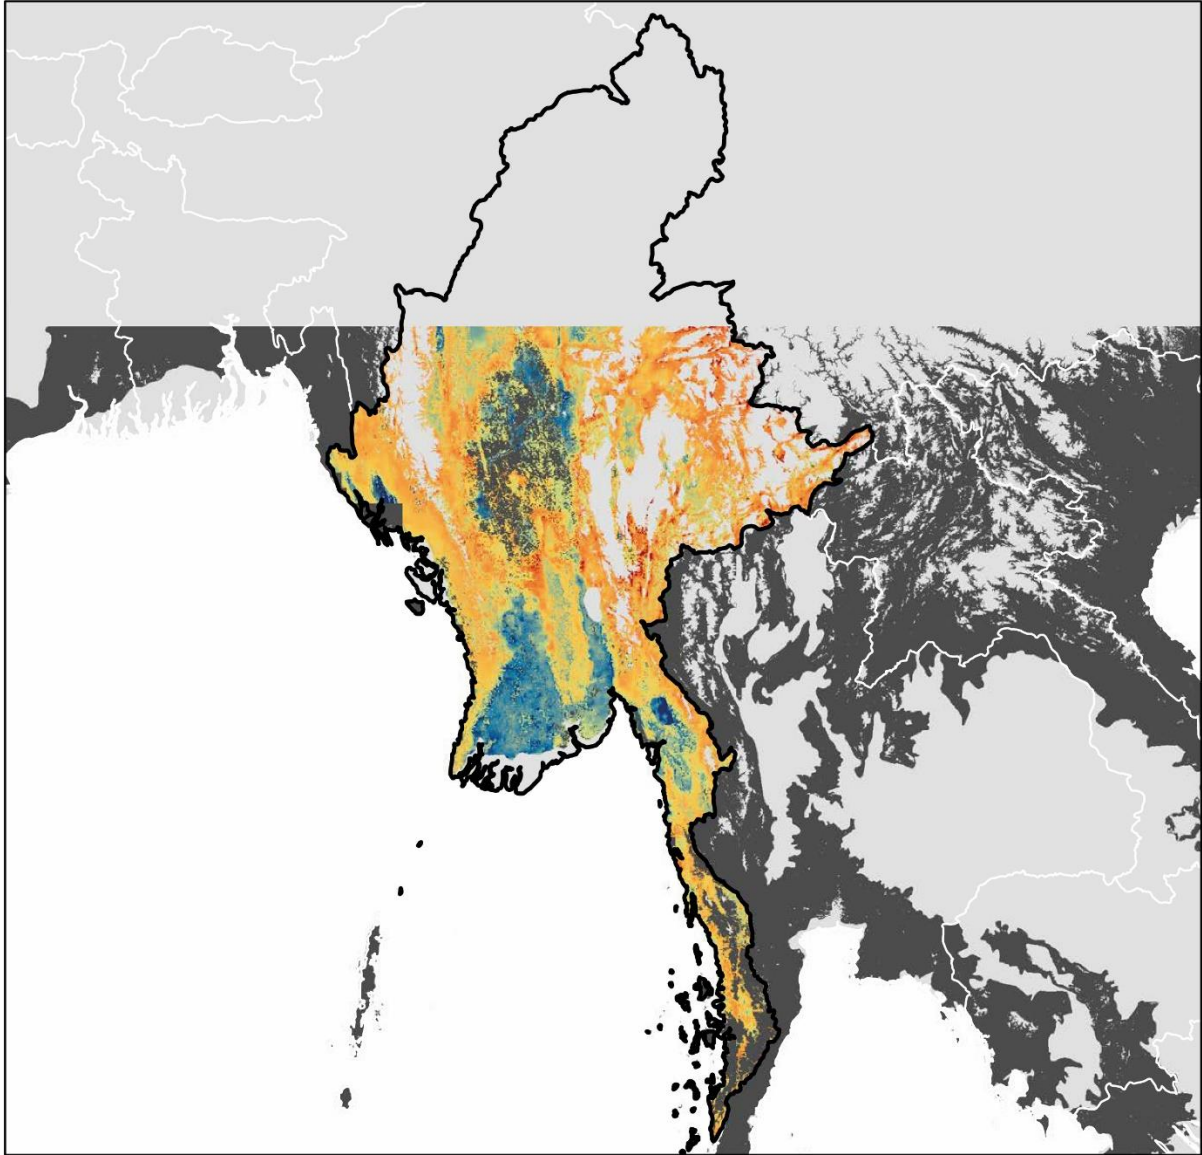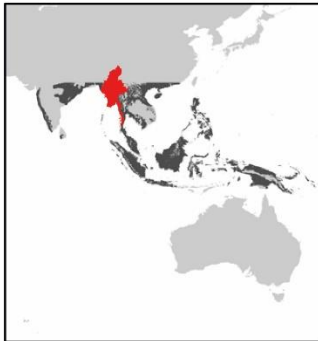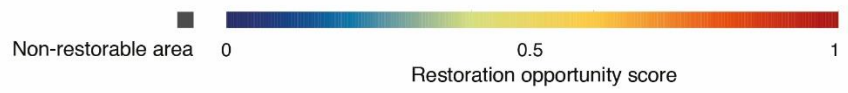

■ Myanmar

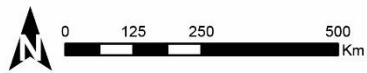



# Nicaragua

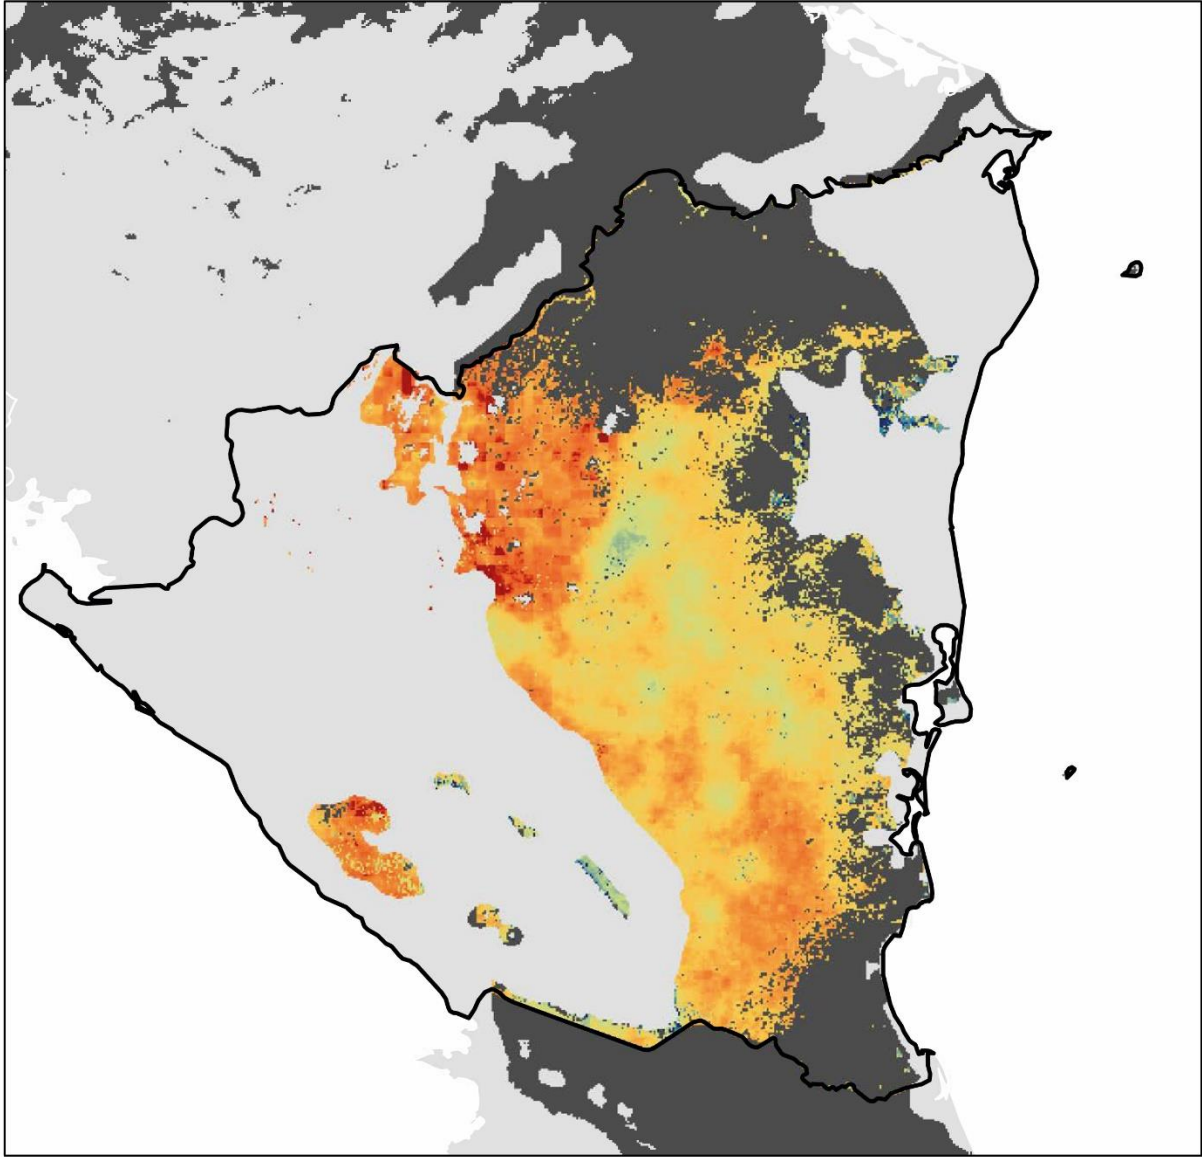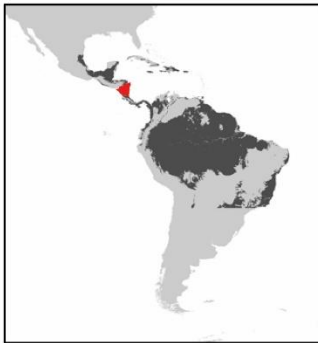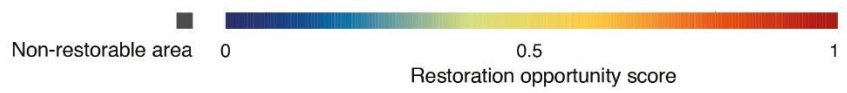

 Nicaragua

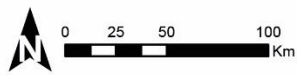

# Nigeria

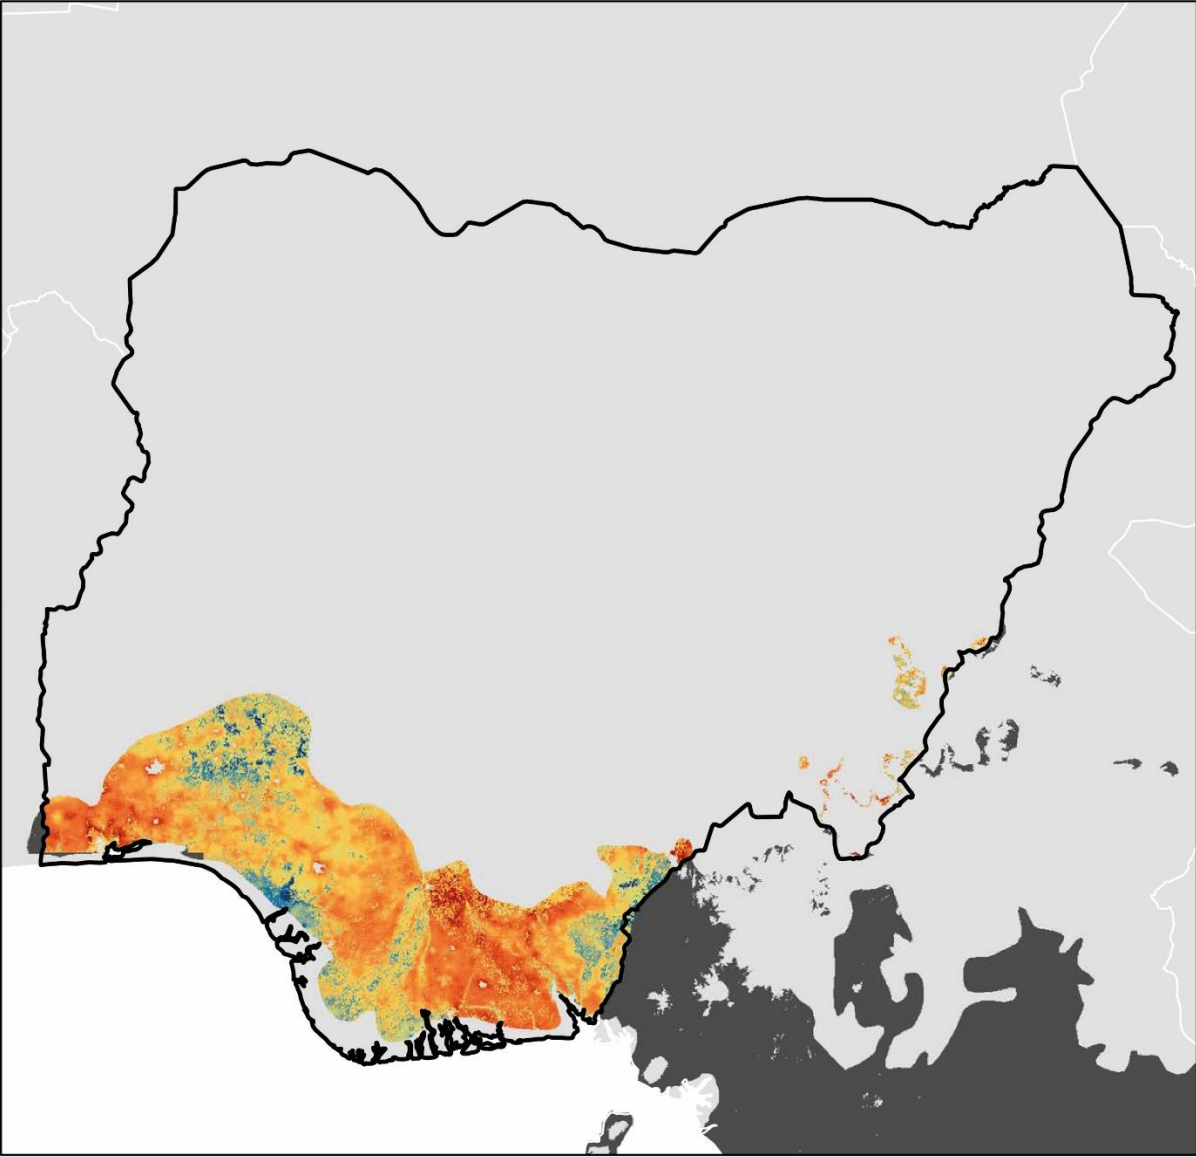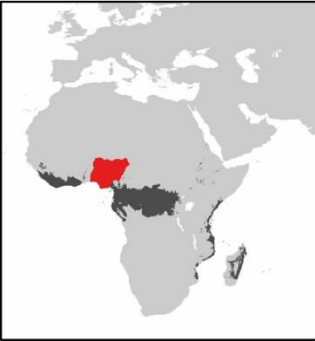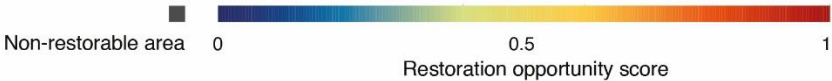

Nigeria

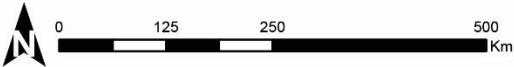

# Panama

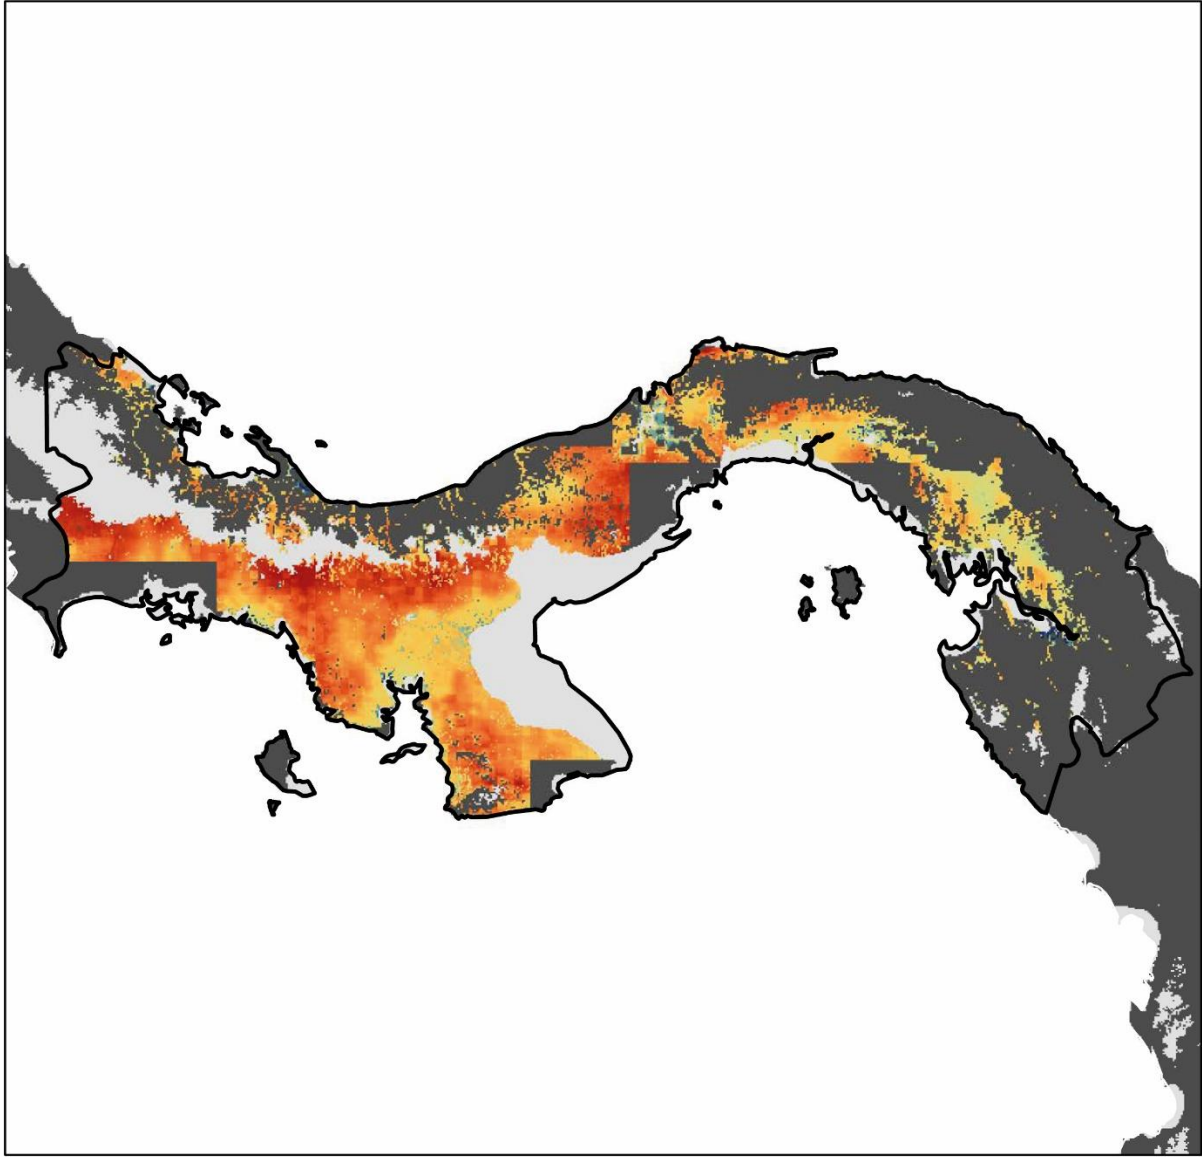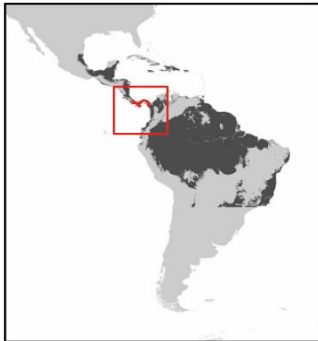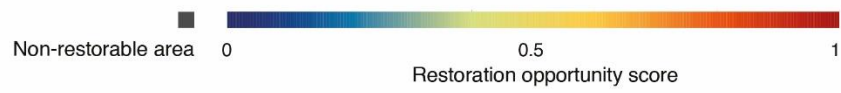

Panama

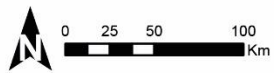

# Papua New Guinea

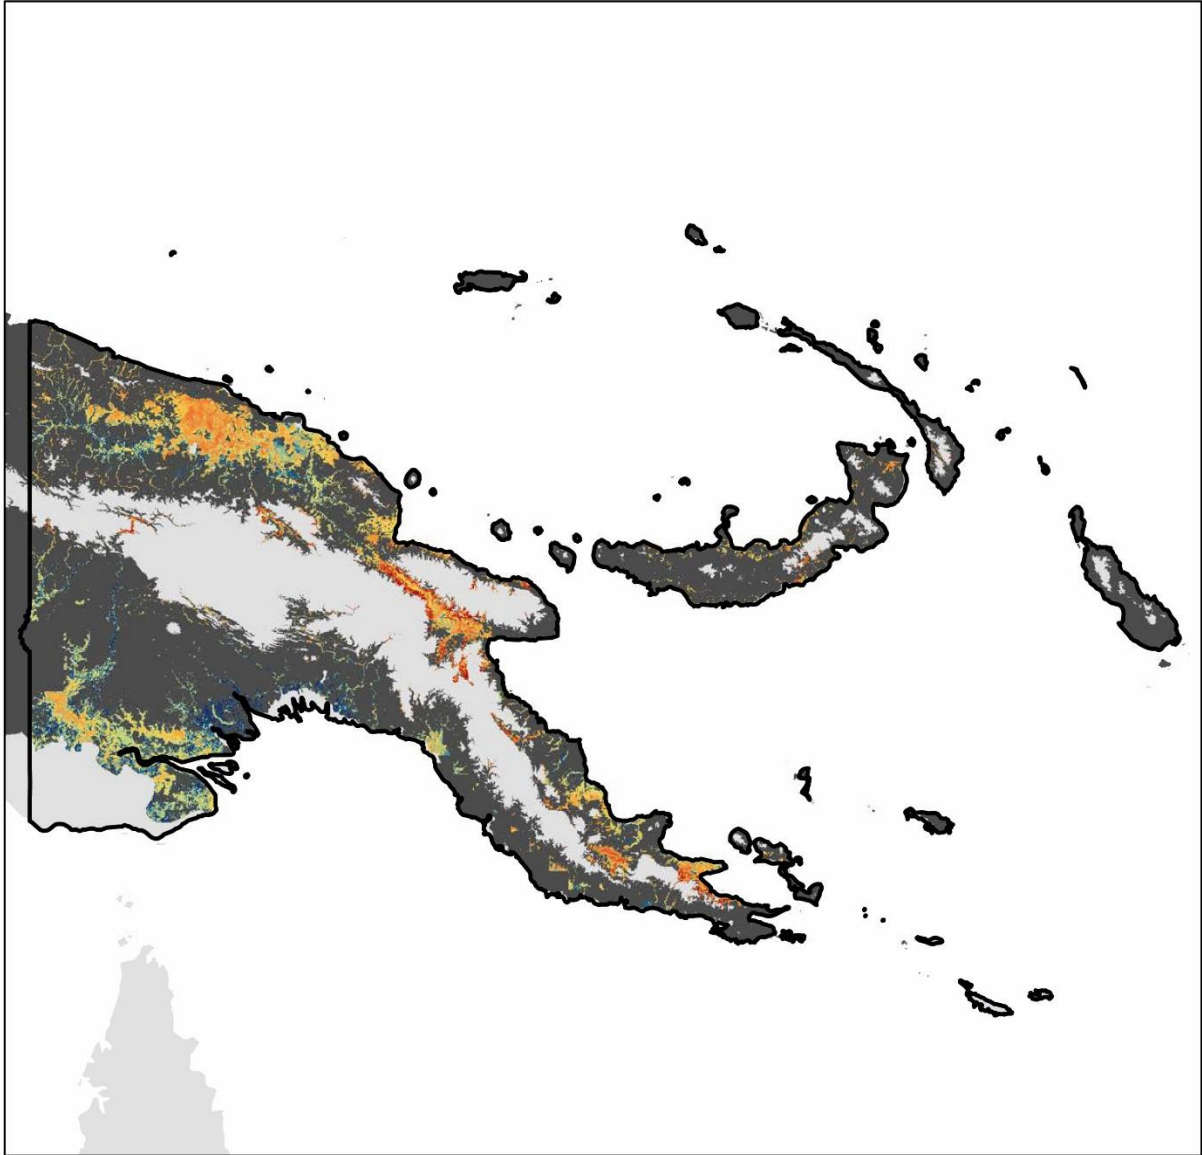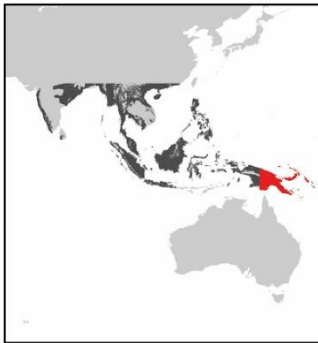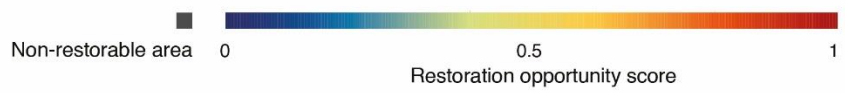

 Papua New Guinea

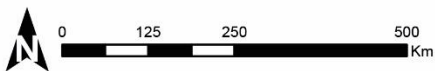

# Paraguay

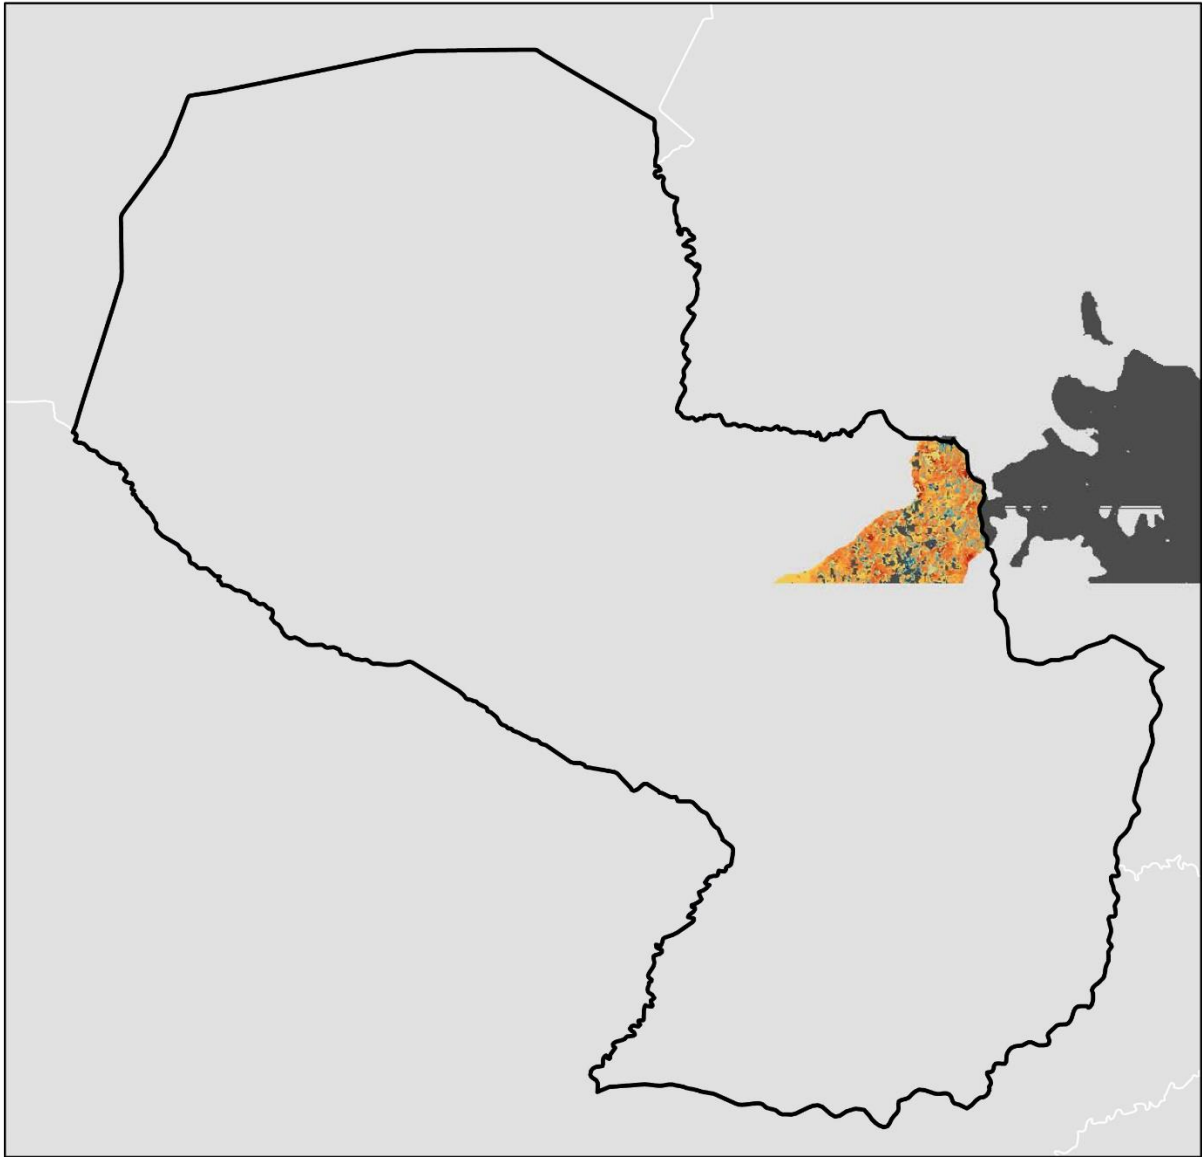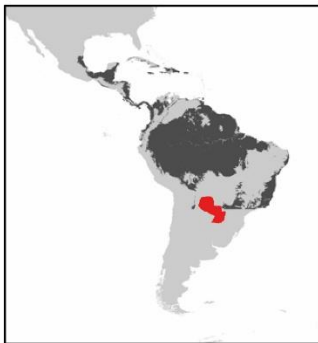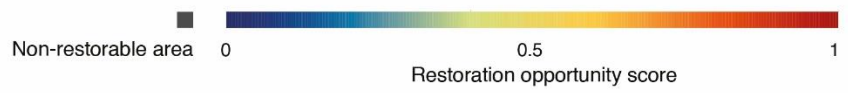

Paraguay

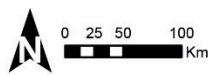



# Peru

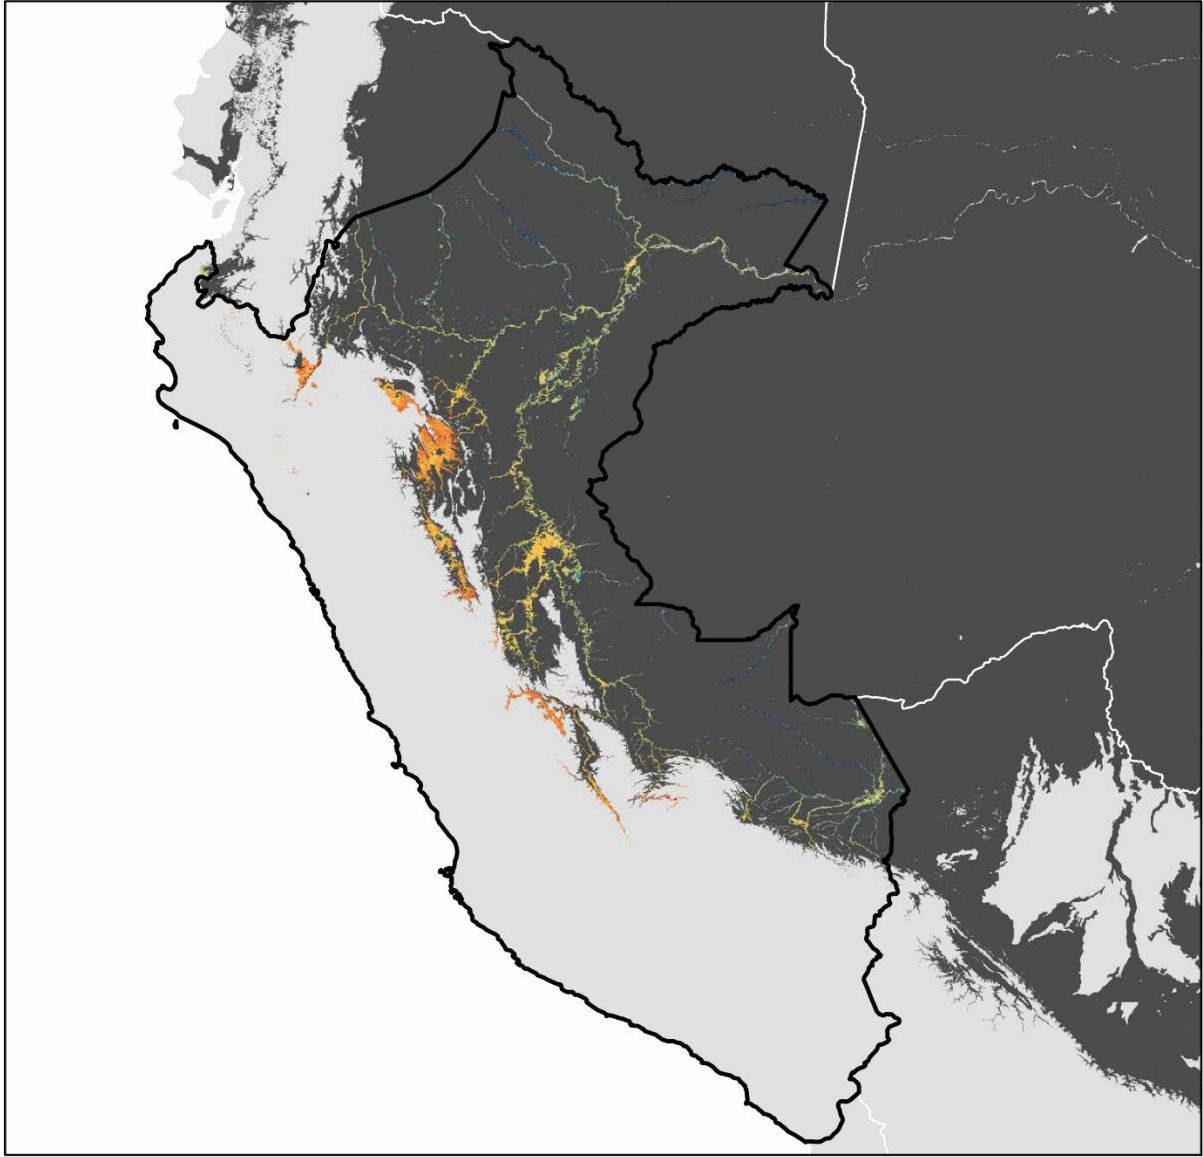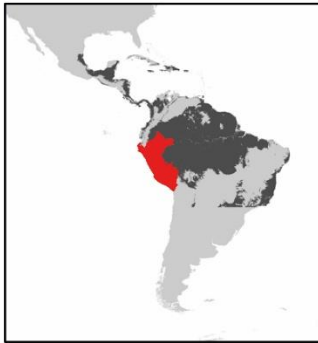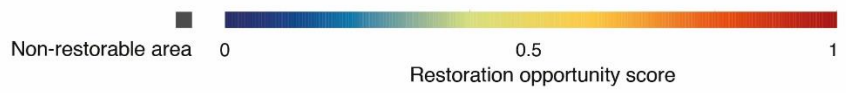

Peru

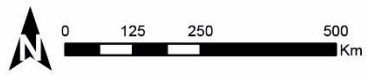

# Philippines

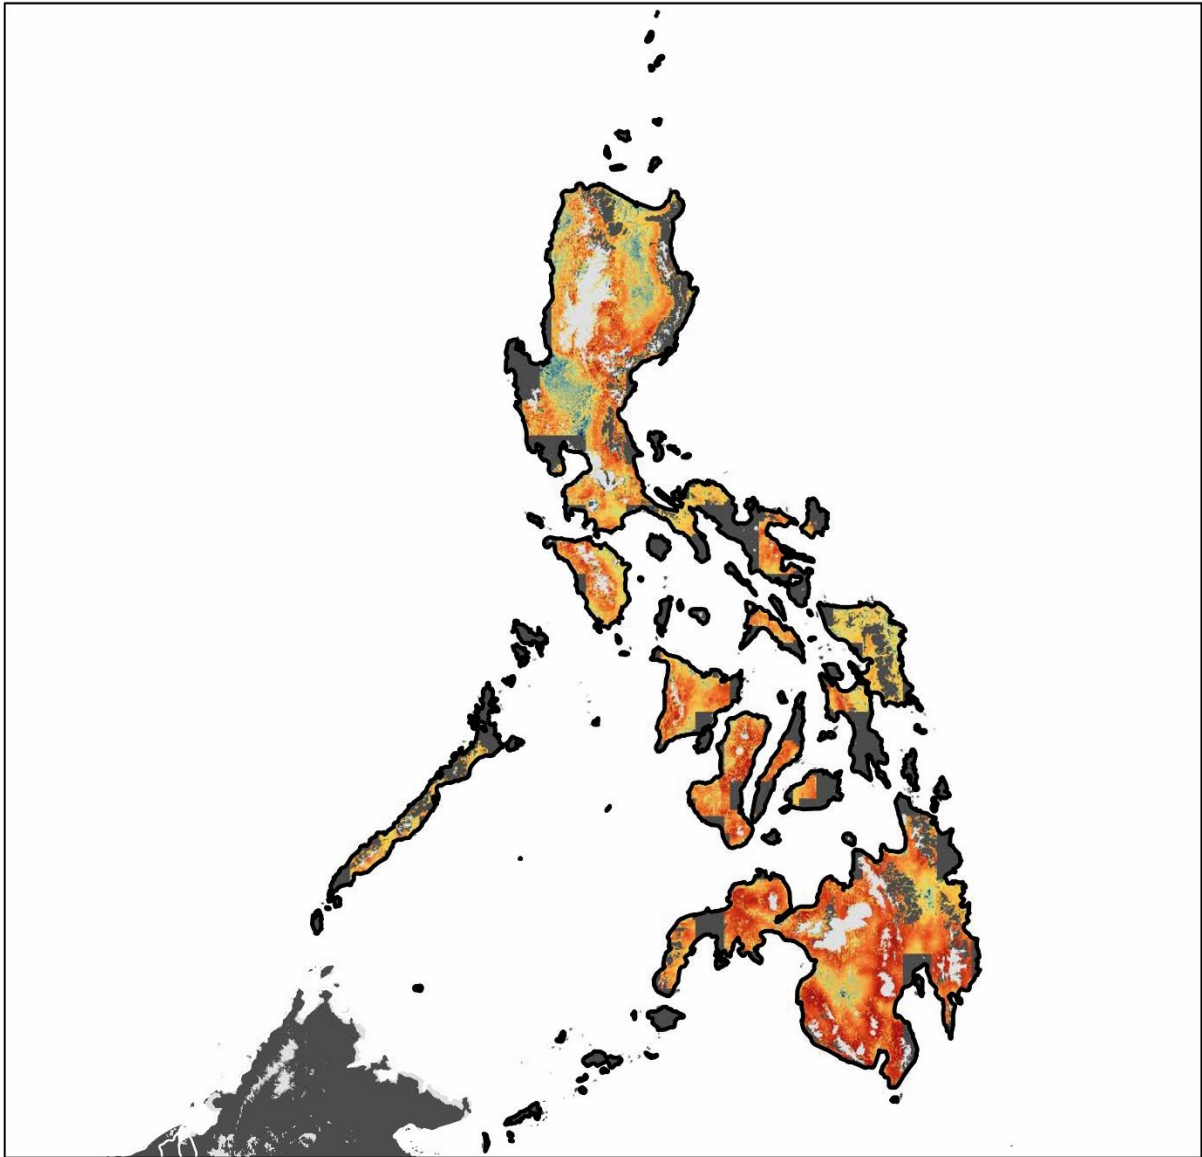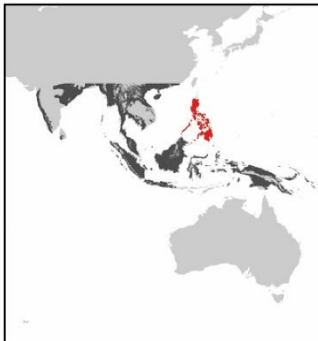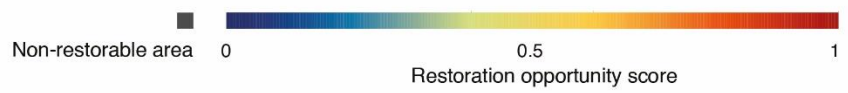

Philippines

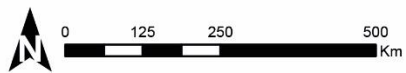

# Puerto Rico

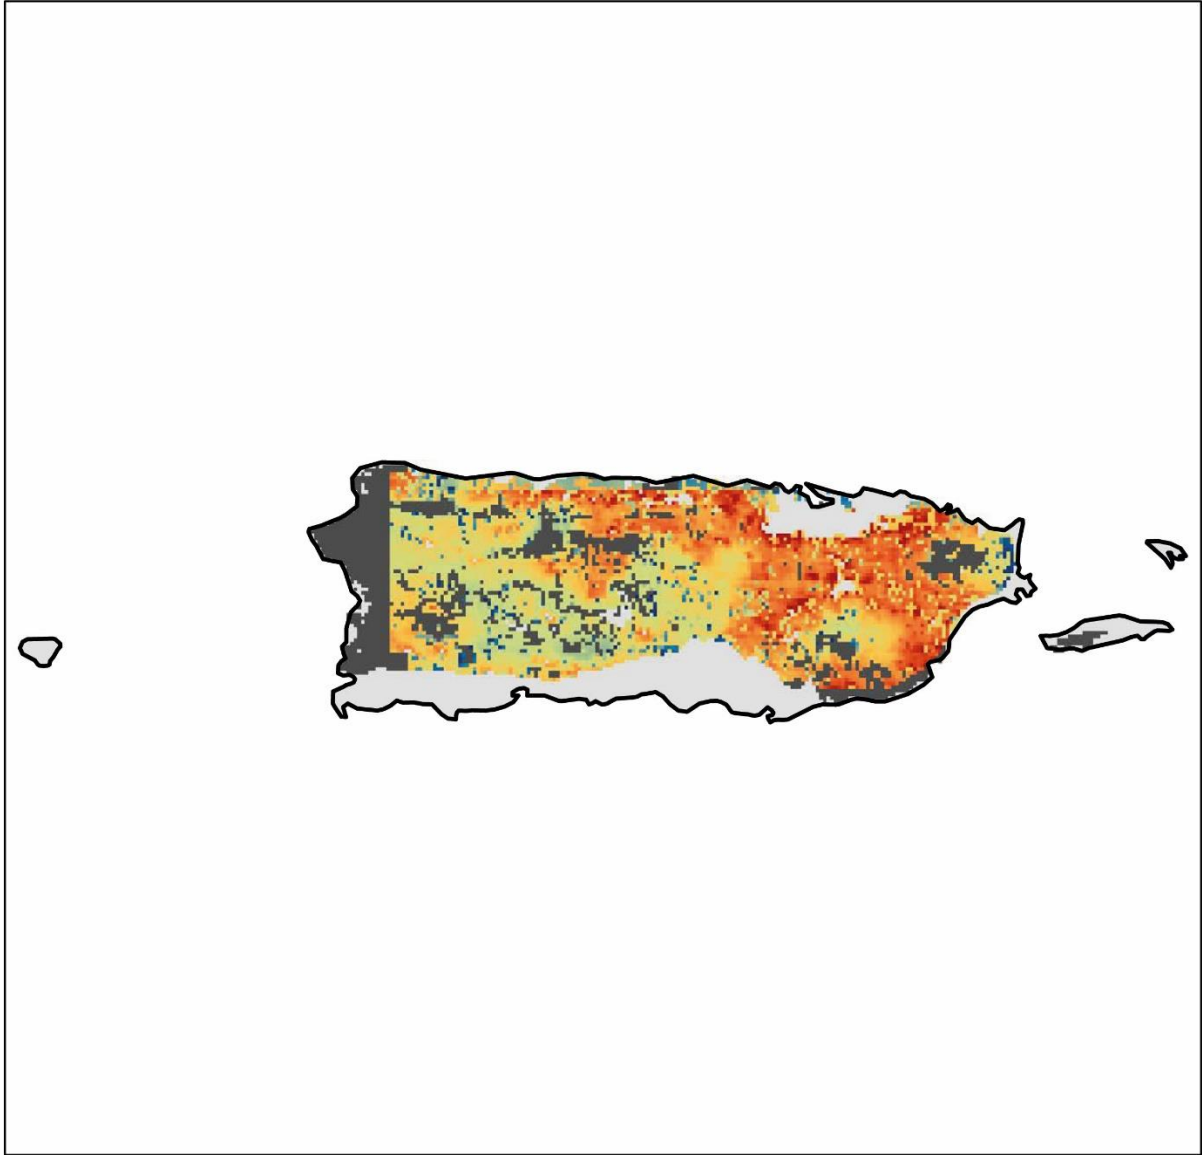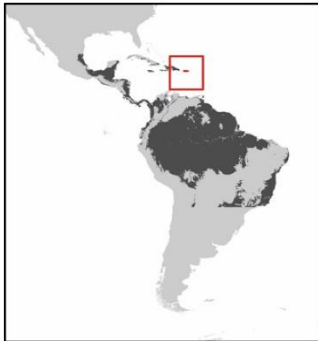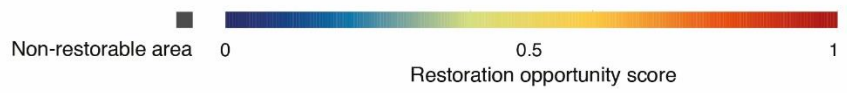

 Puerto Rico

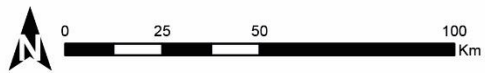

# Republic of the Congo

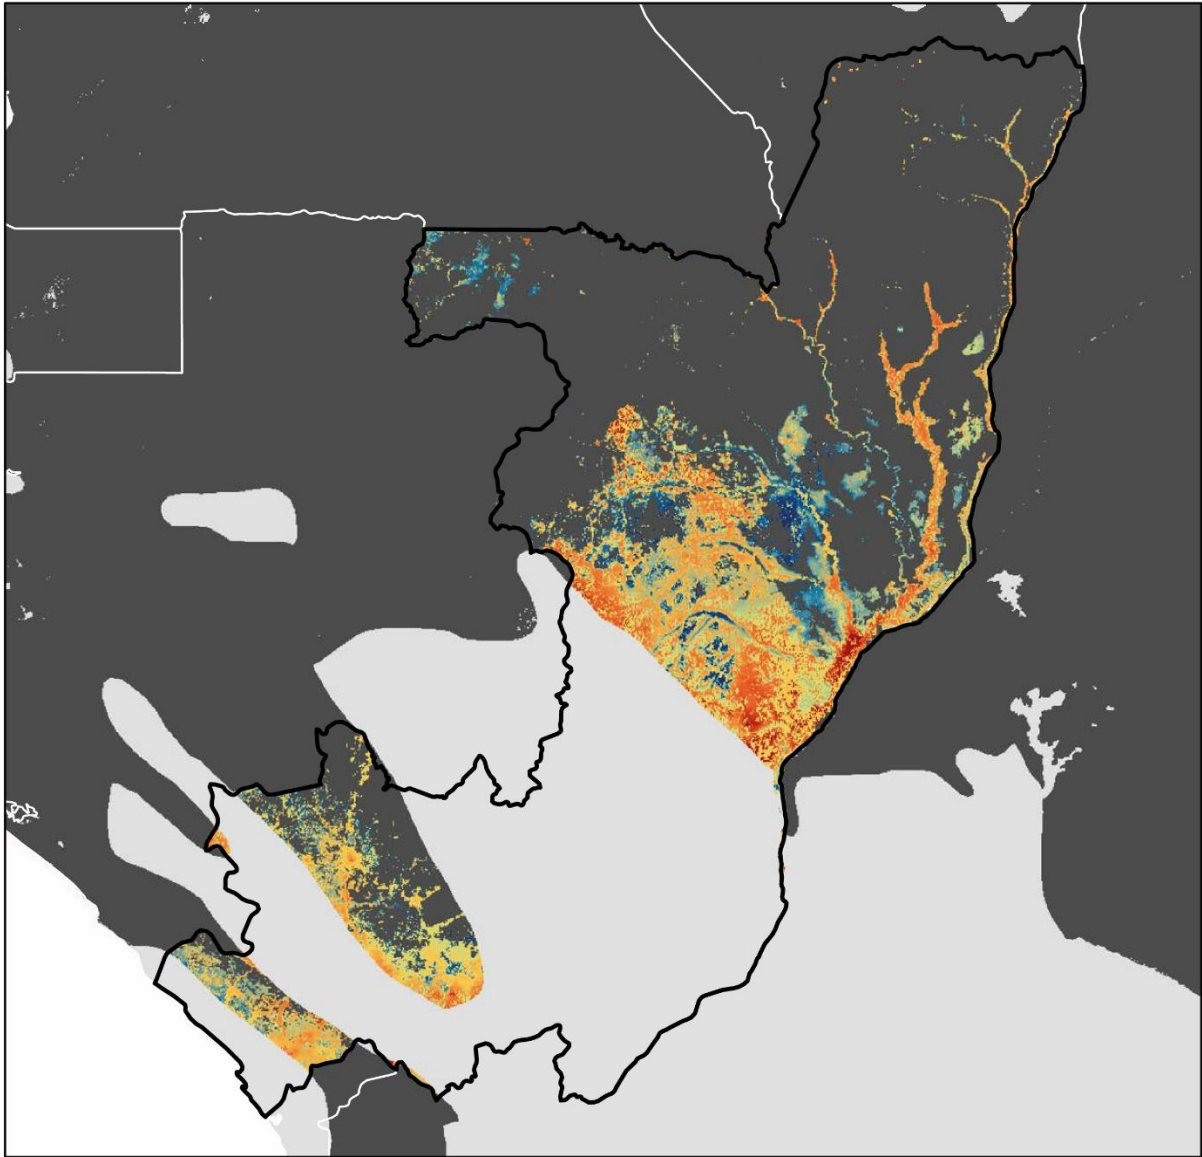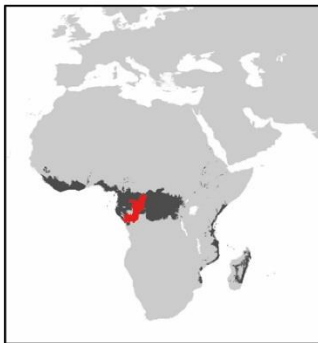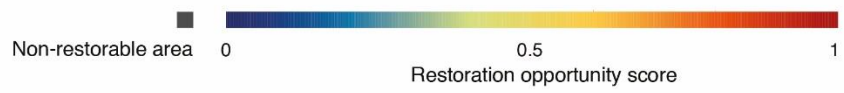

■ Republic of the Congo

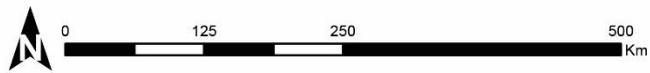

# Sierra Leone

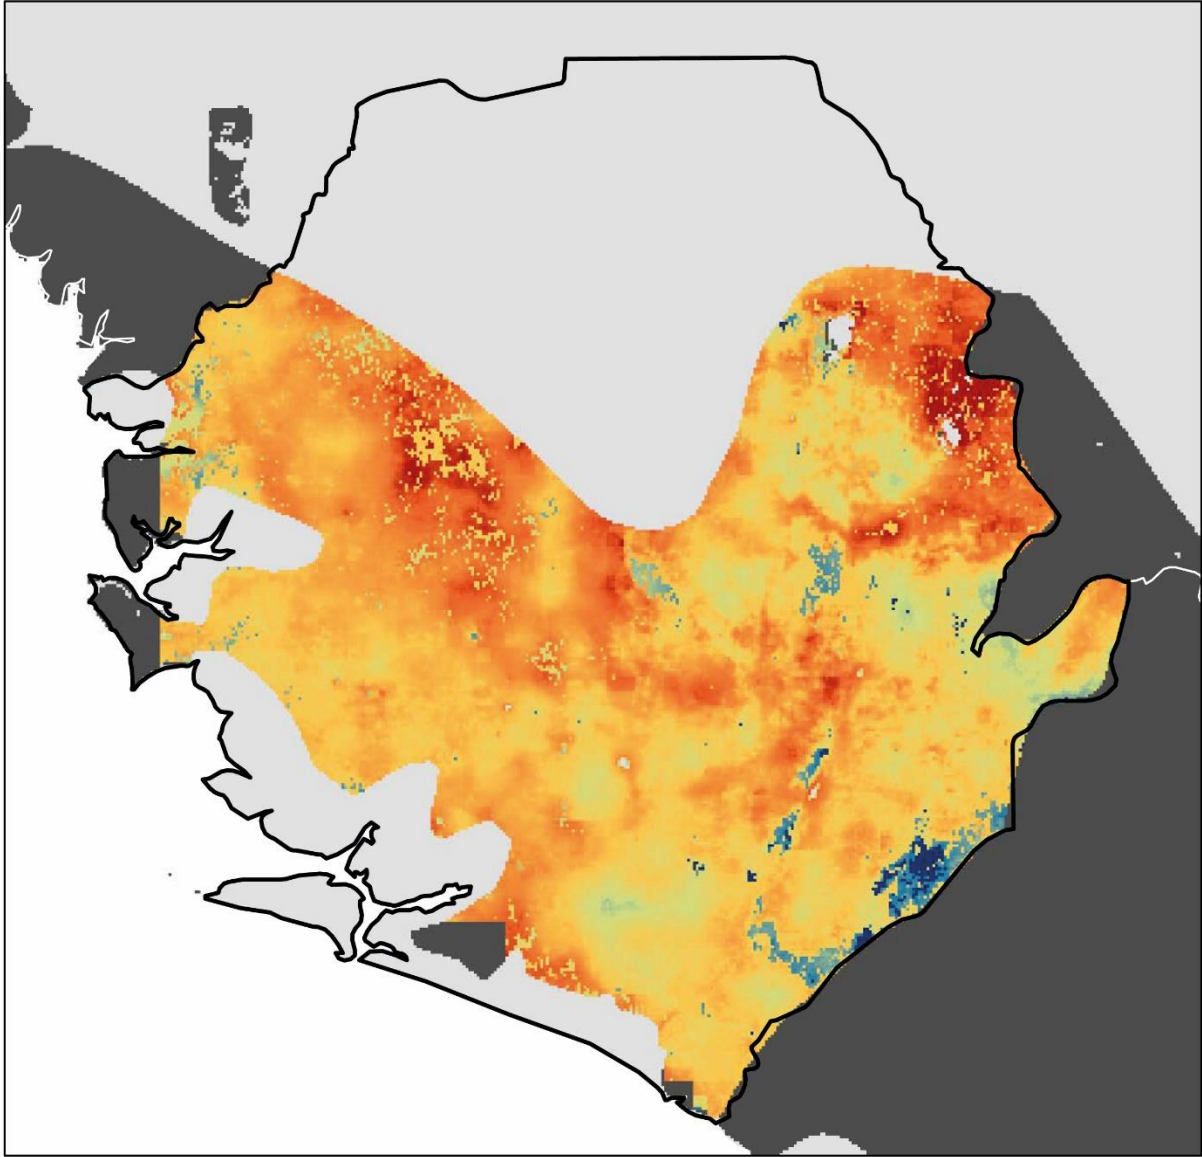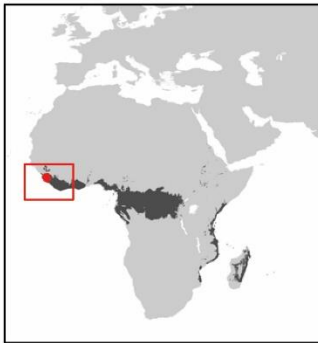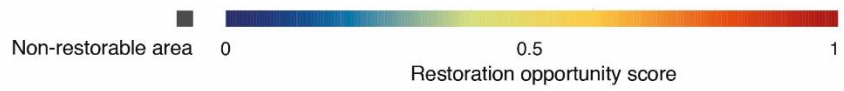

Sierra Leone

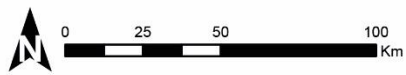



# Somalia

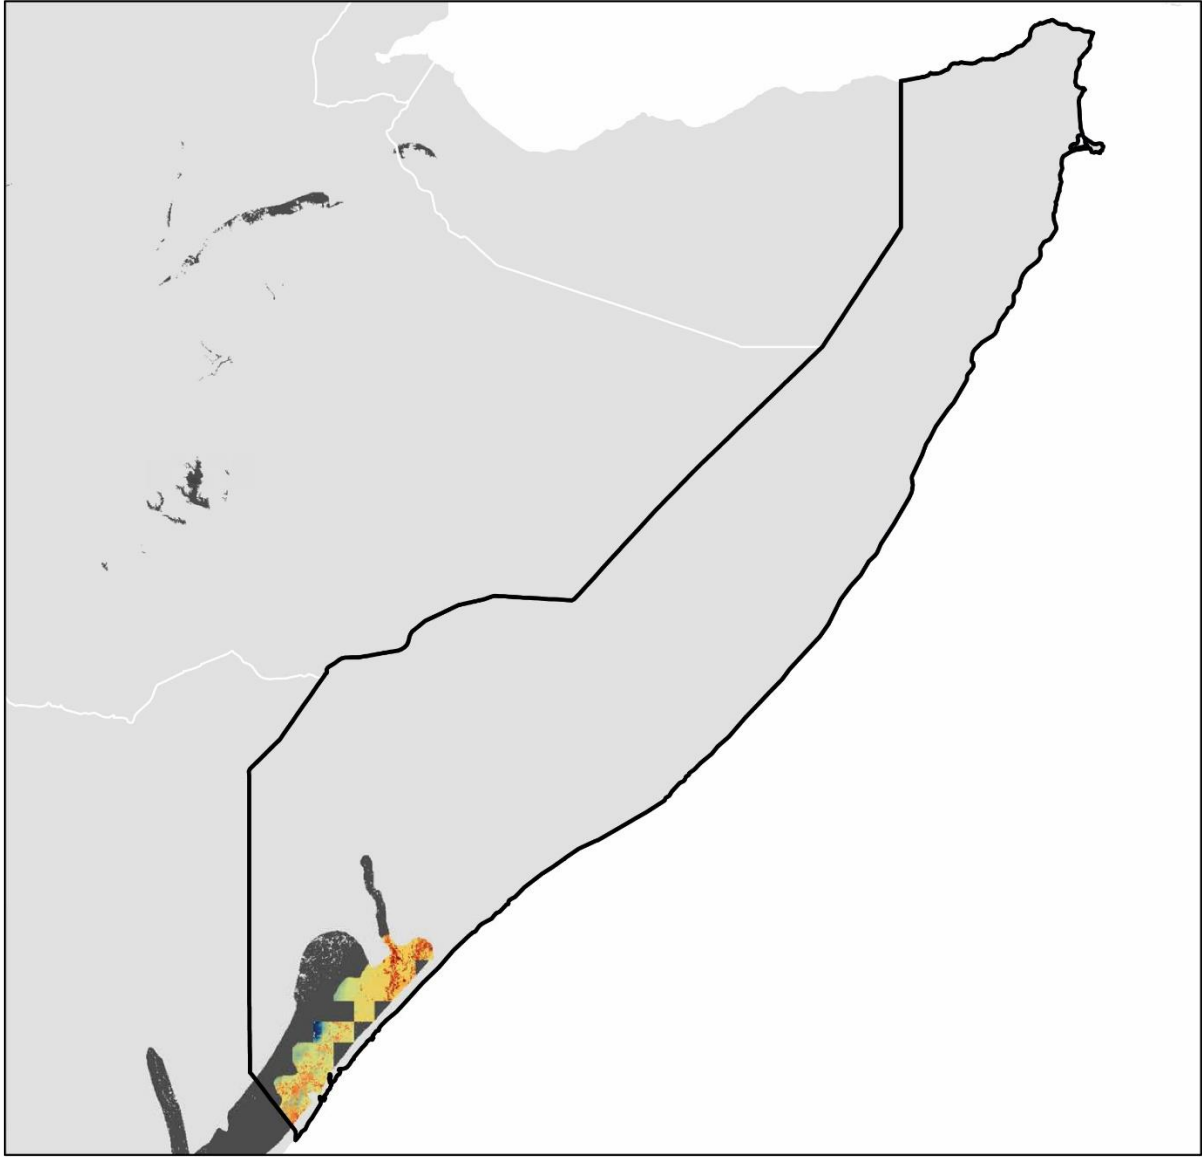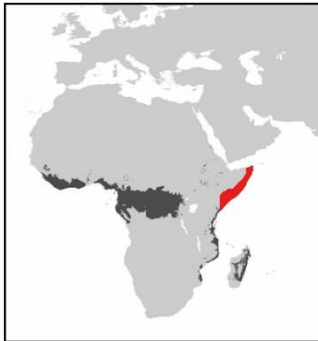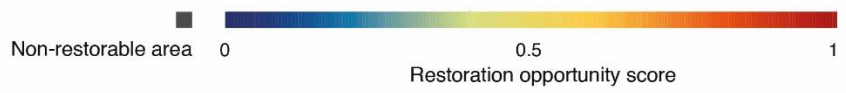

■ Somalia

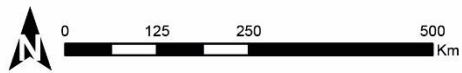

# Sri Lanka

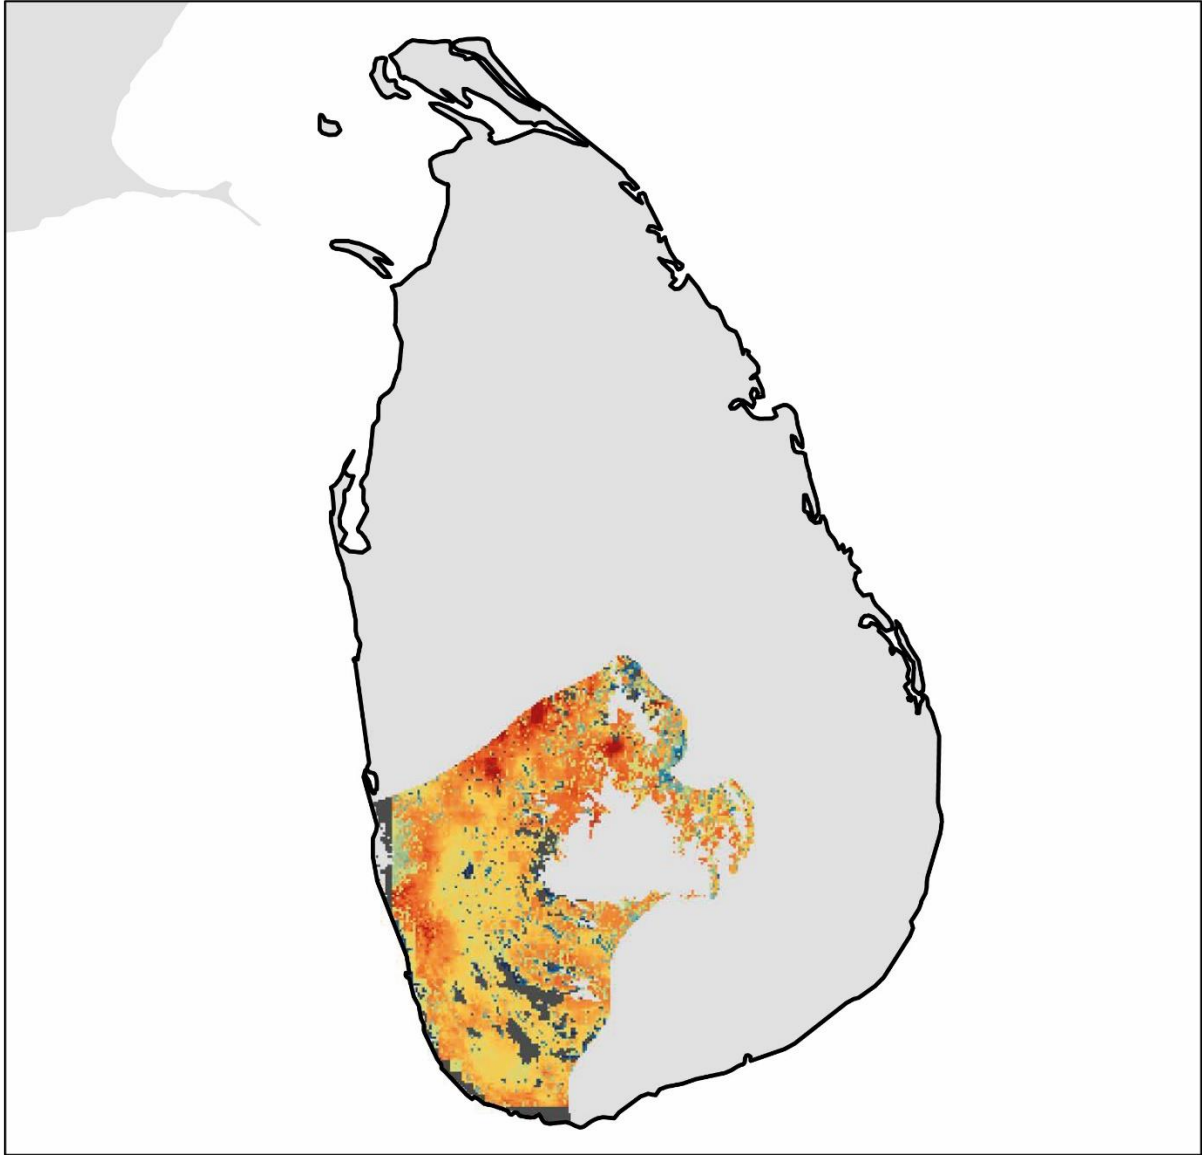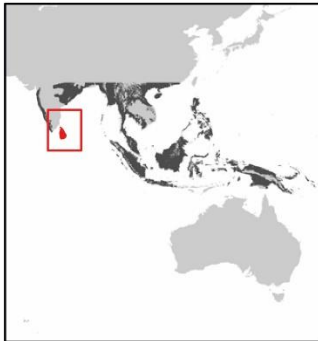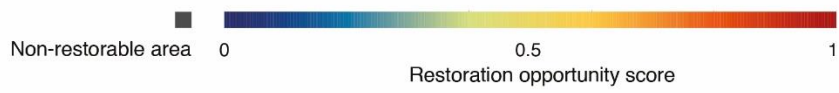

 Sri Lanka

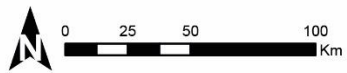

# Suriname

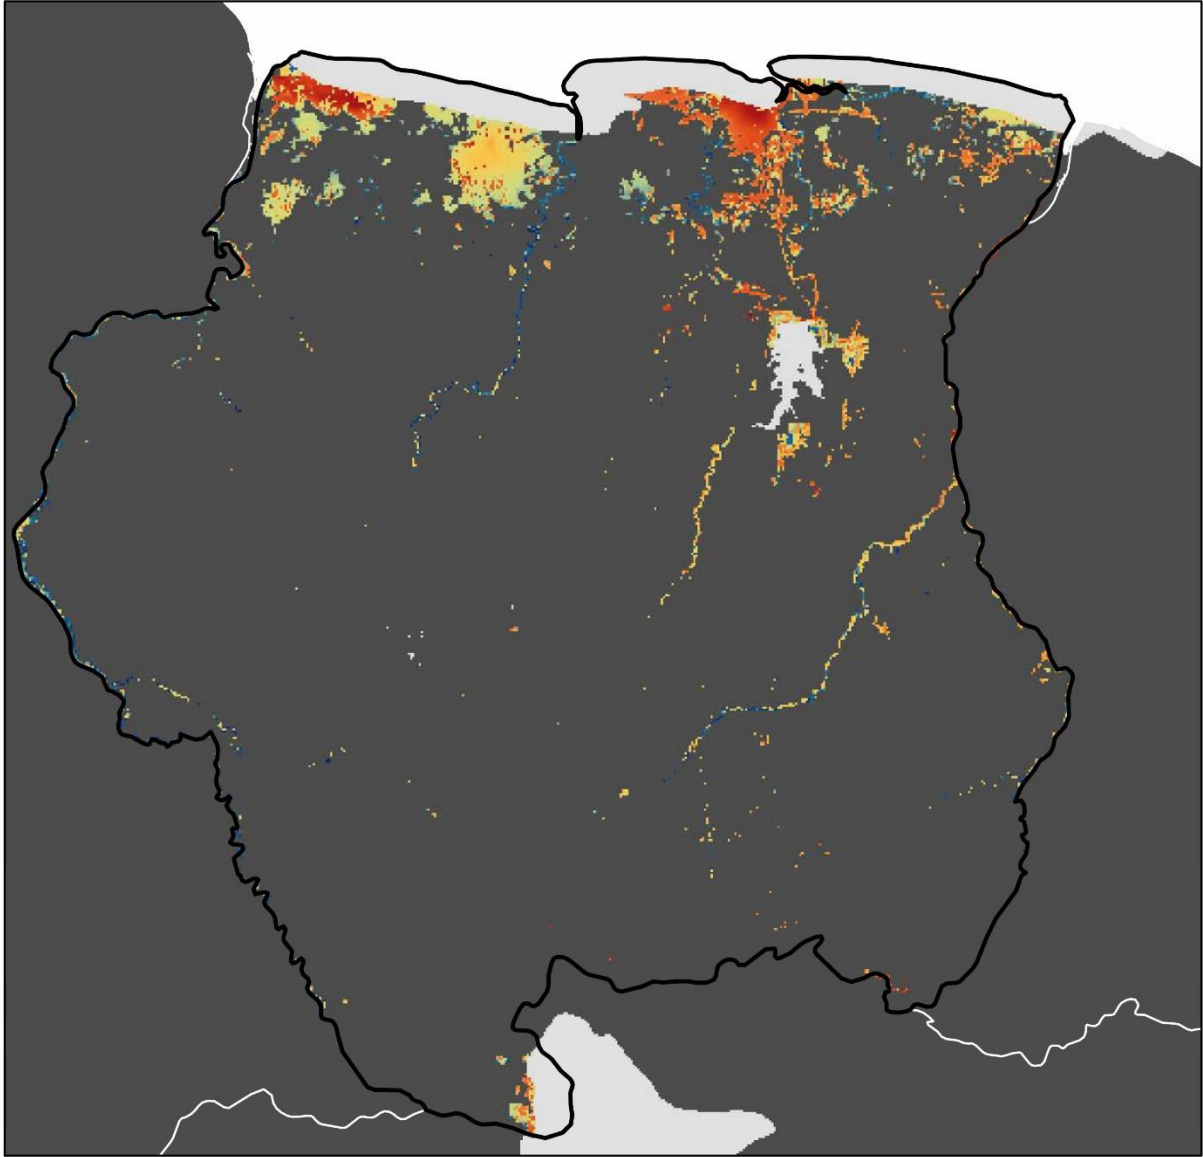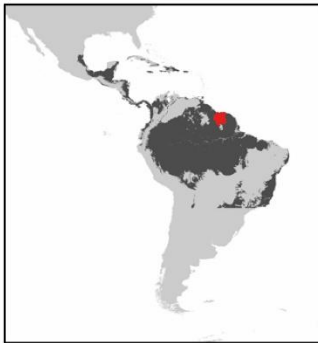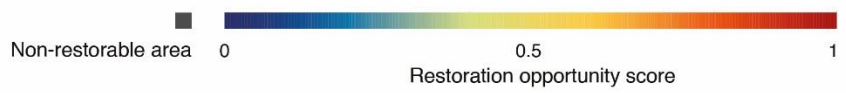

Suriname

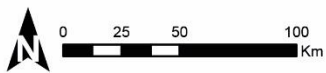

# Thailand

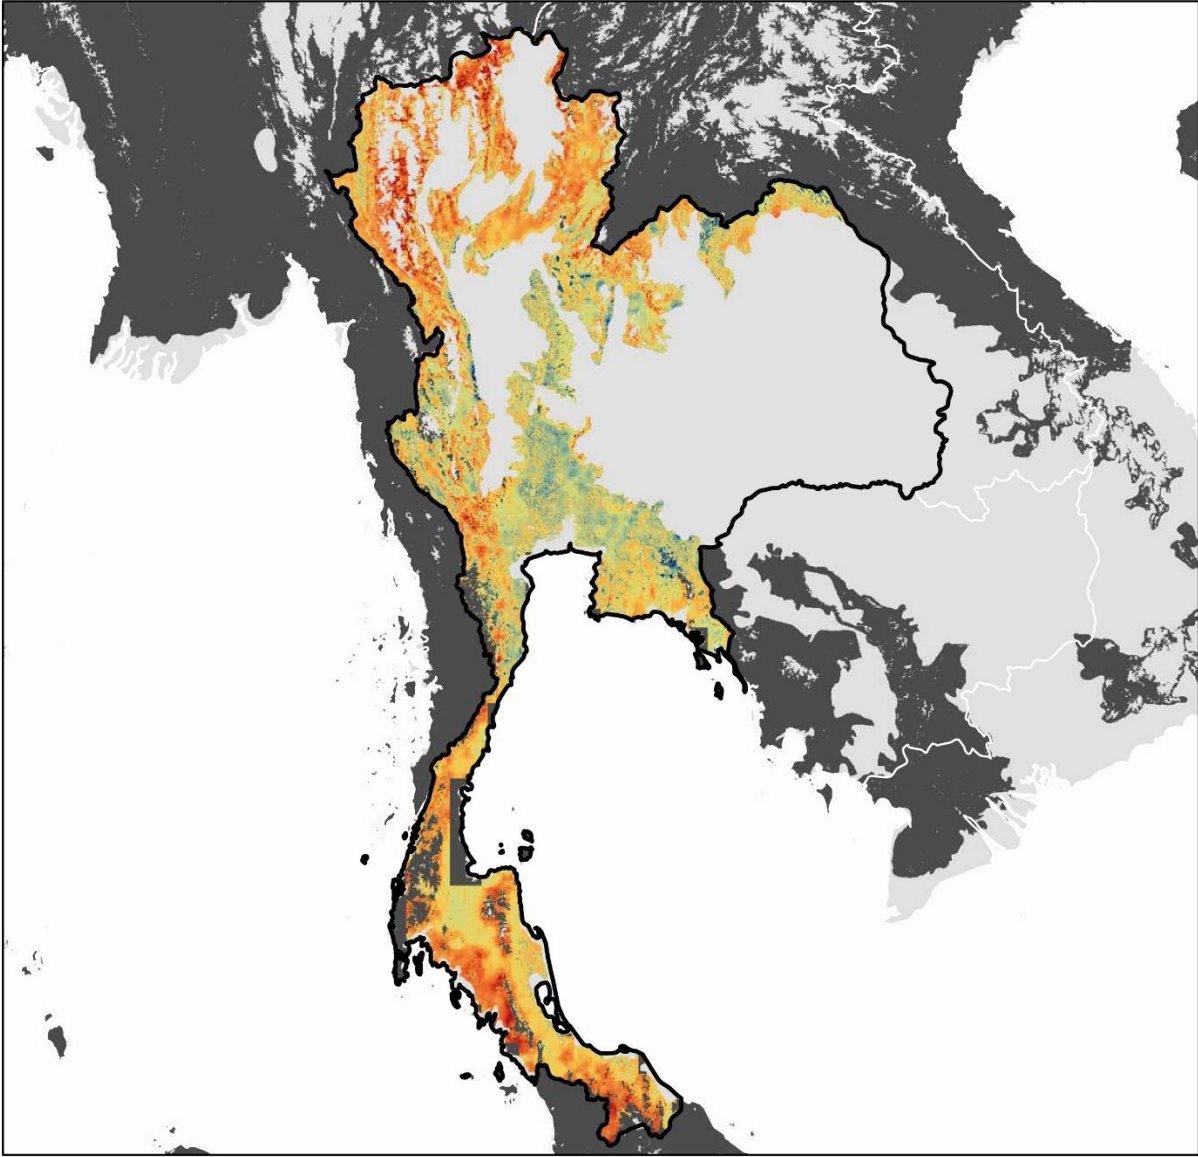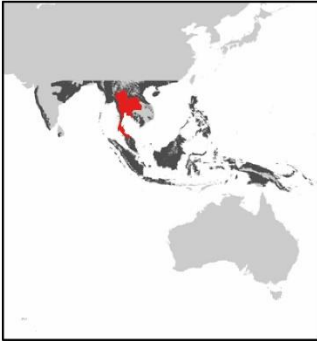

Non-restorable area 0 0.5 1  
Restoration opportunity score

Thailand

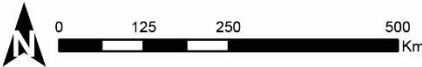

# Togo

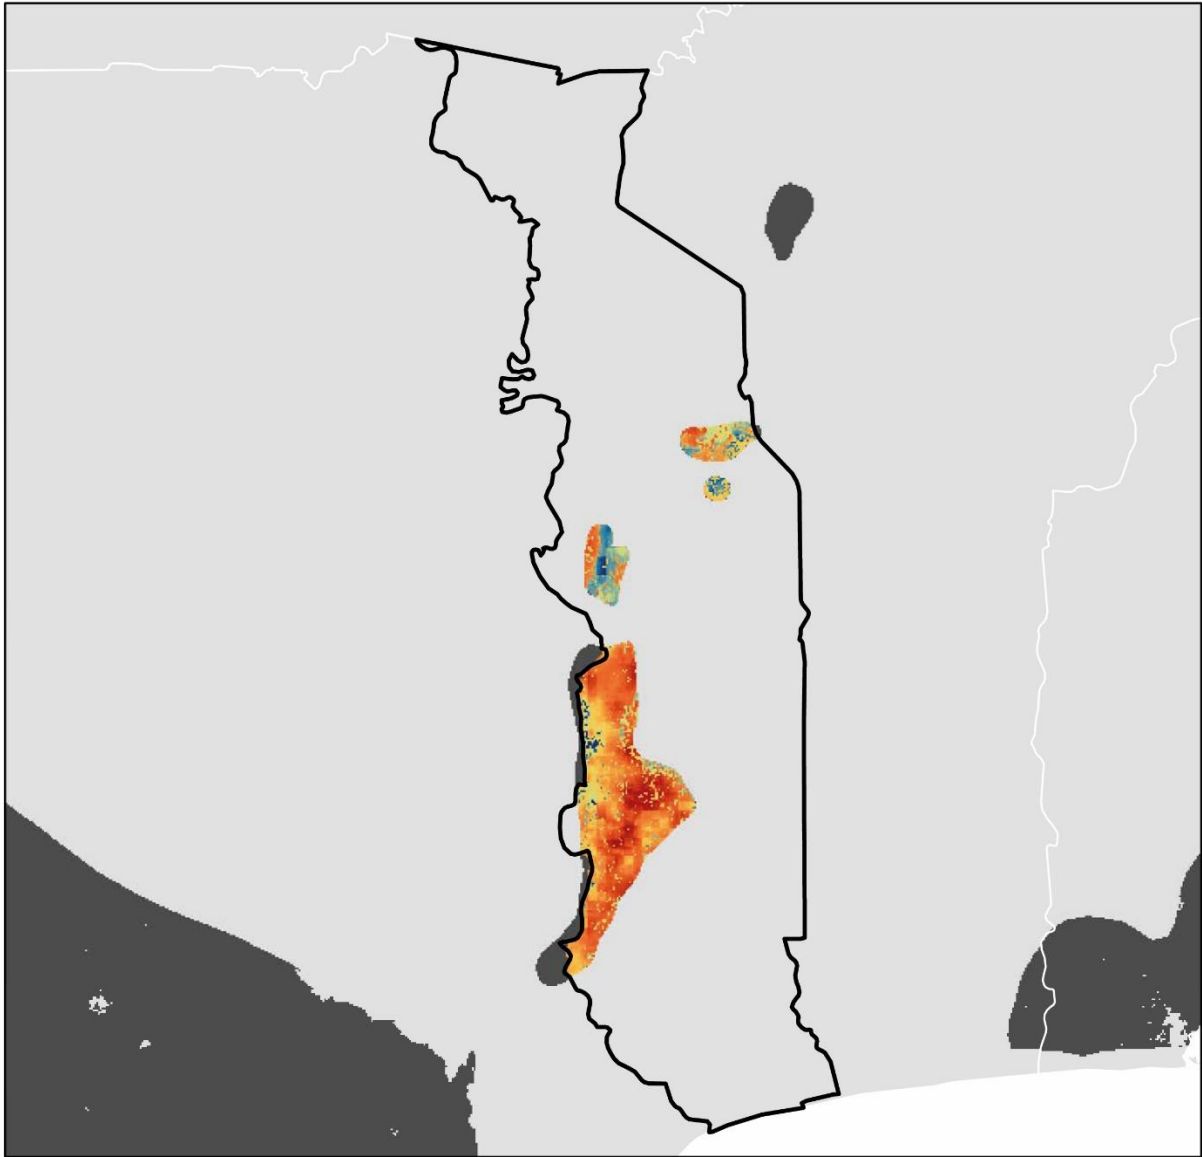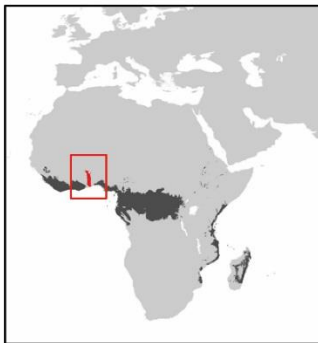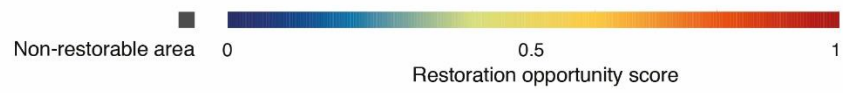

■ Togo

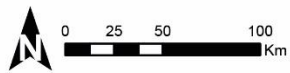



# Trinidad and Tobago

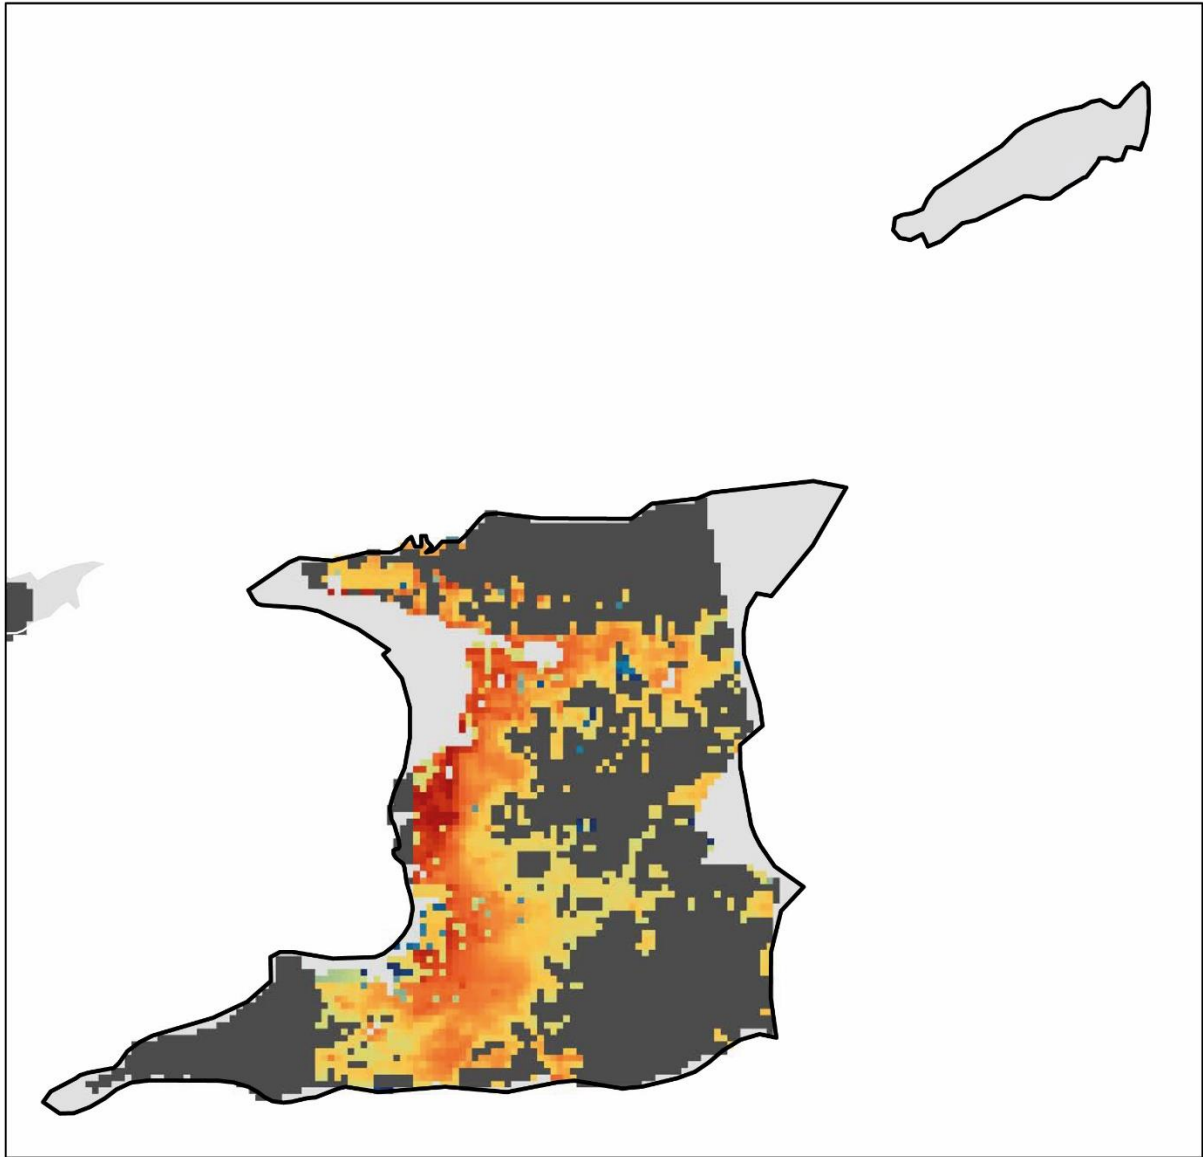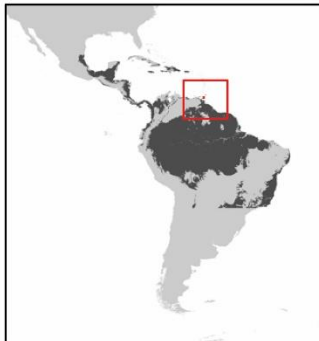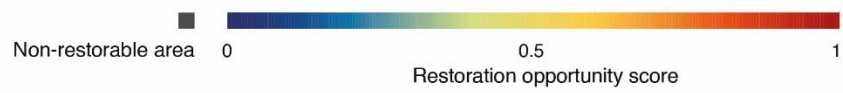

 Trinidad and Tobago

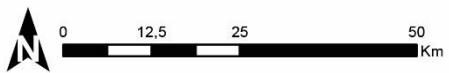

# United Republic of Tanzania

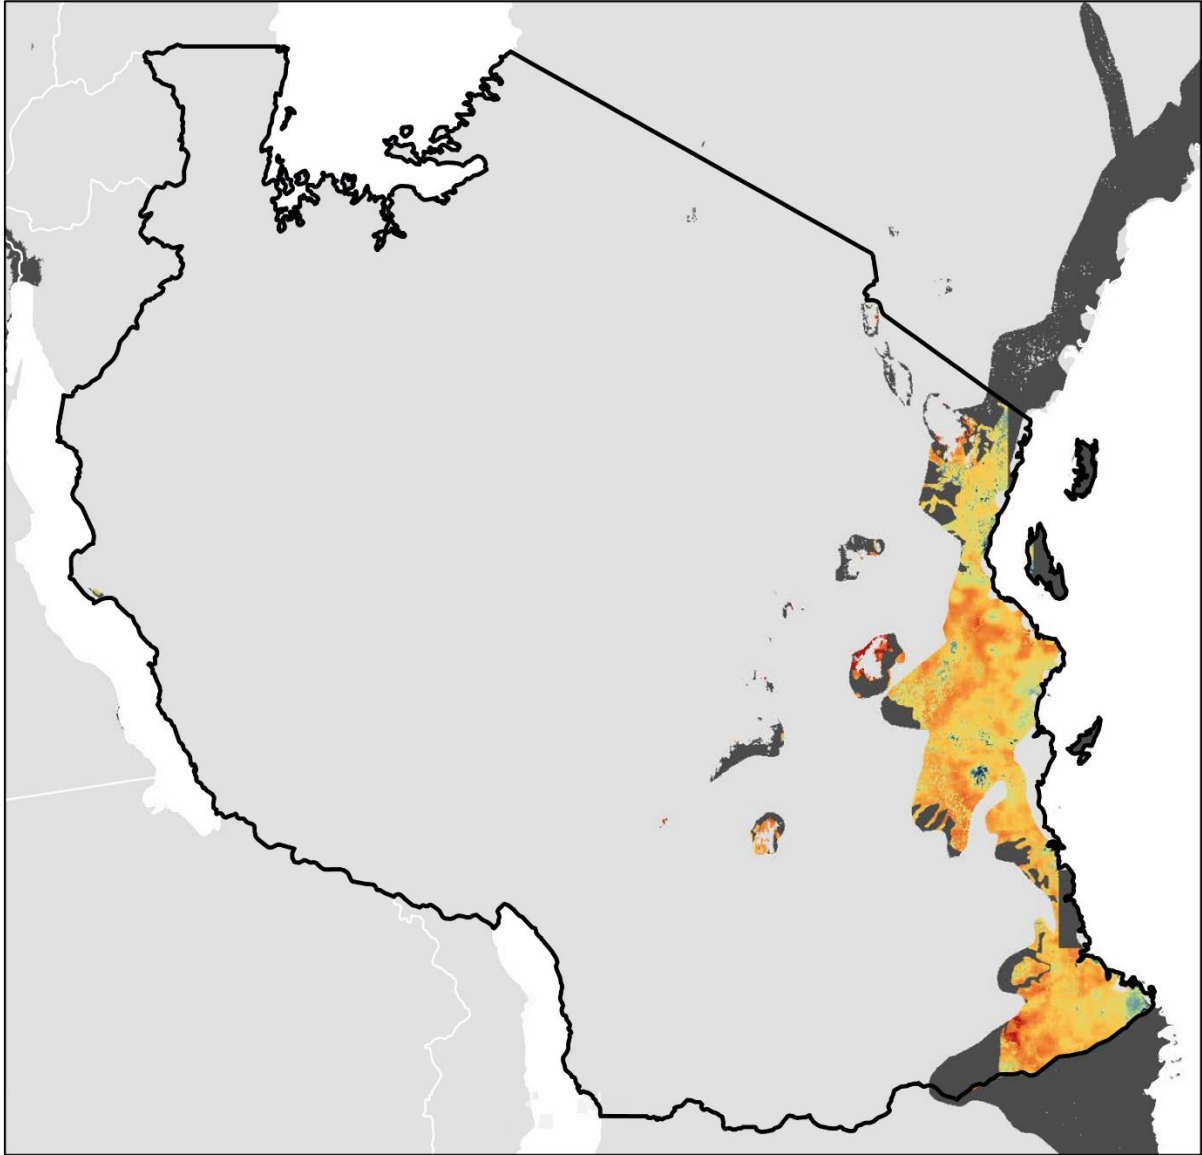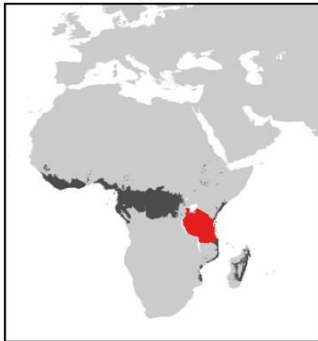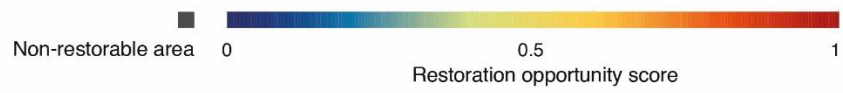

United Republic of Tanzania

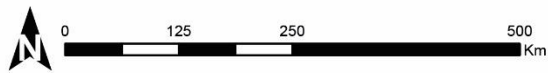

# Venezuela

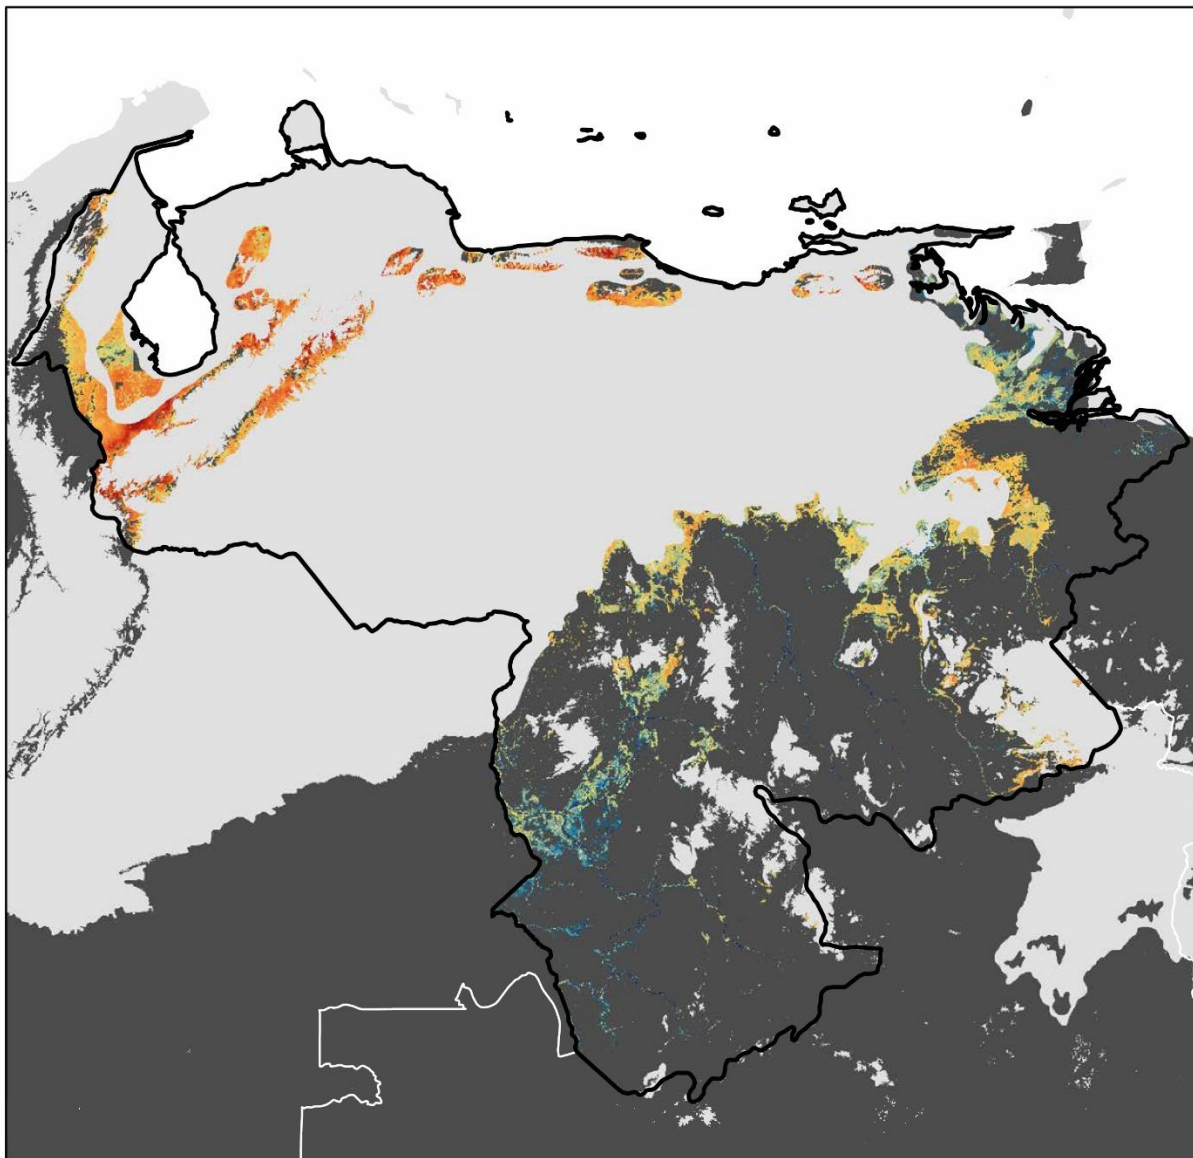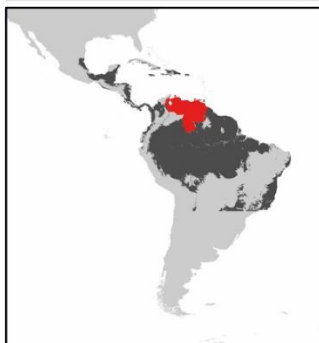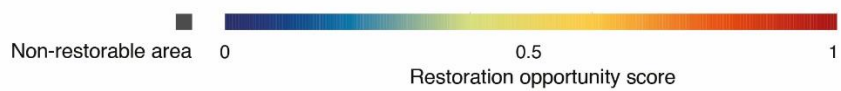

■ Venezuela

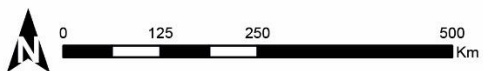

# Vietnam

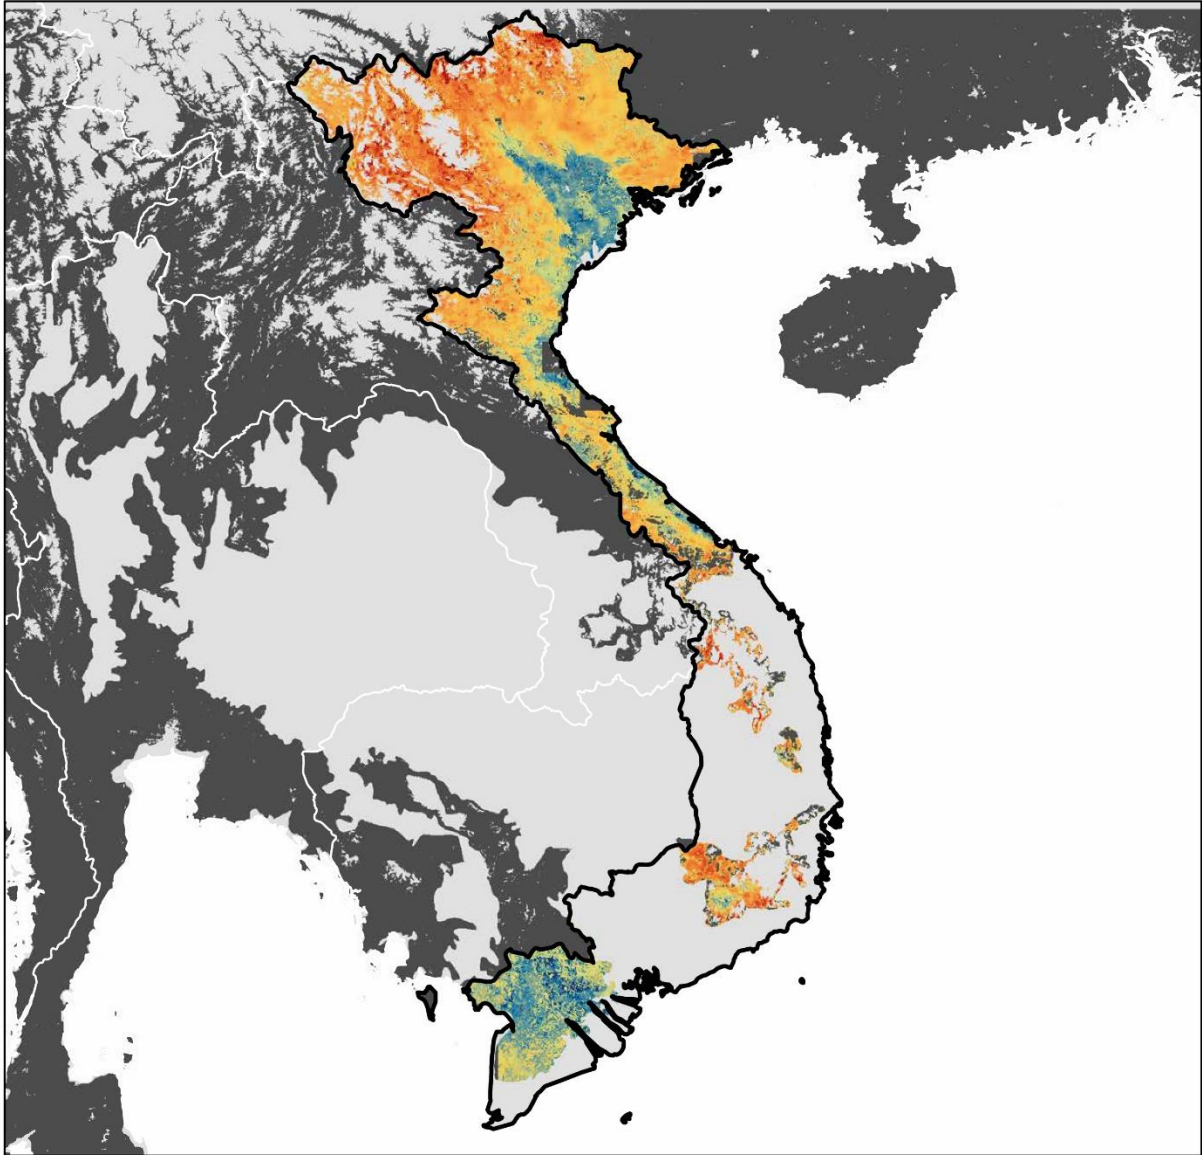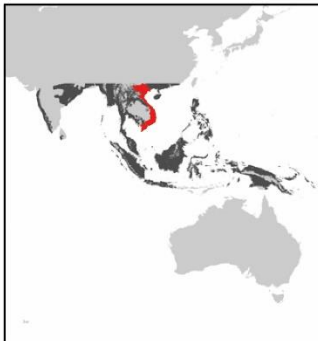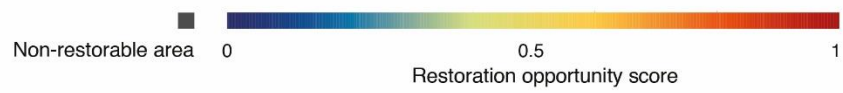

 Vietnam

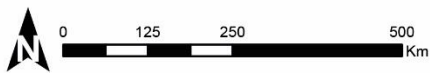

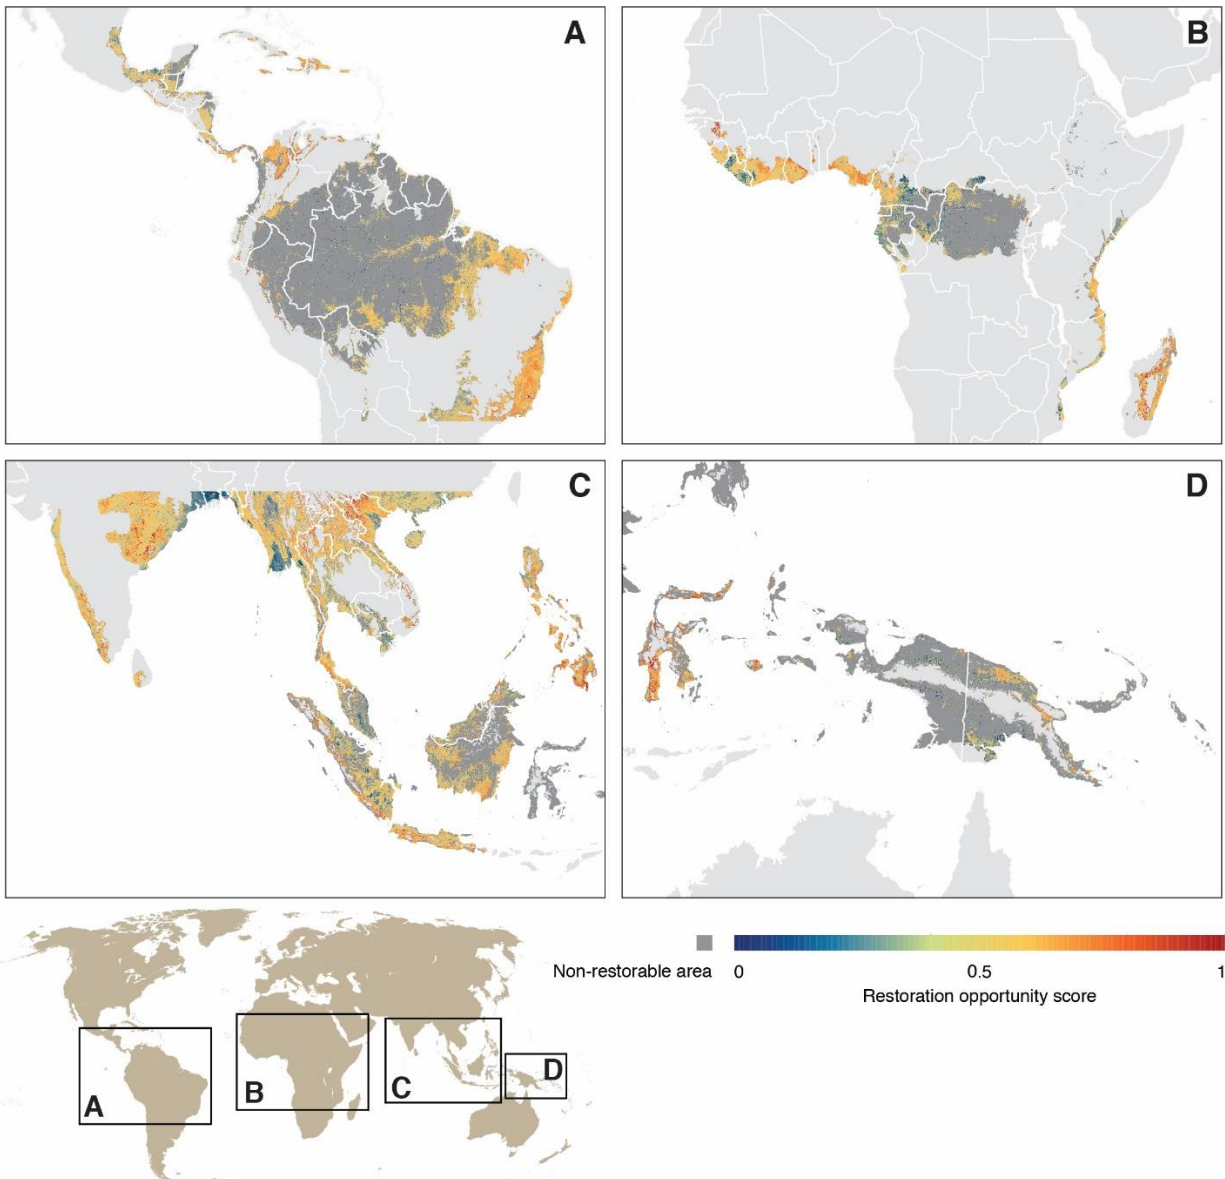

**Fig. S3. ROS of tropical rainforest landscapes of biogeographical realms, with data renormalized for each realm (A, Neotropics; B, Afrotropics; C, Indo-Malaysia; D, Australasia).** The depiction of boundaries and geographic names is simply for display purposes and does not imply views regarding the legal status of any territory or country.



# Atlantic Forest

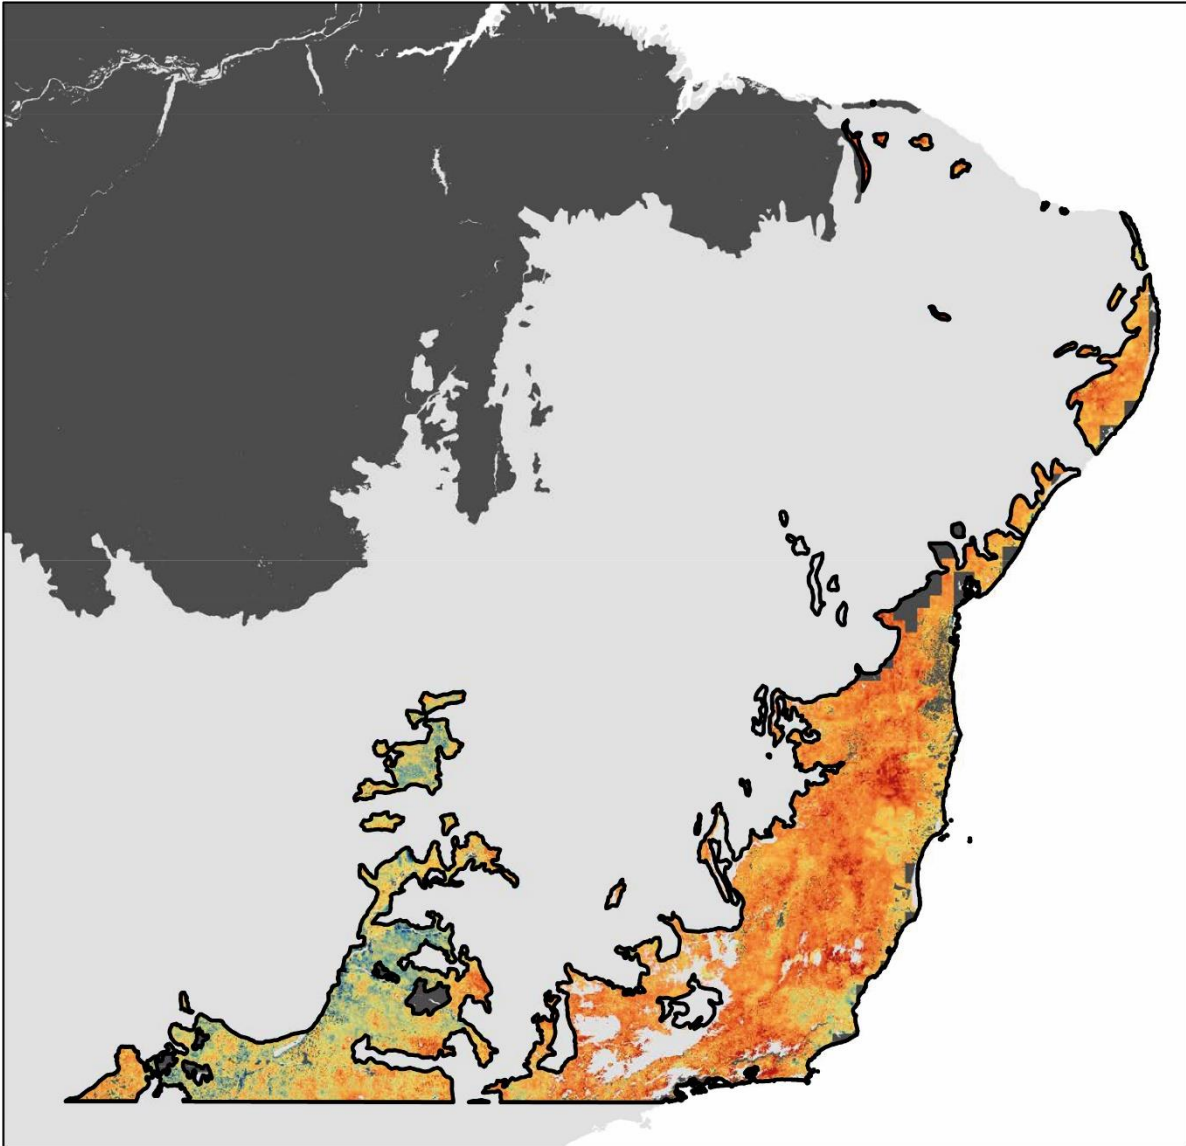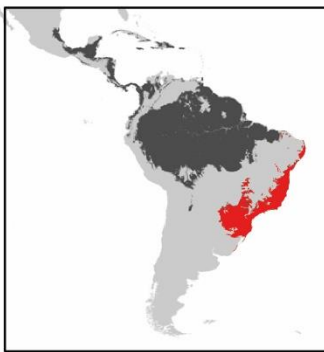

Non-restorable area 0 0.5 1  
Restoration opportunity score

Hotspot Core Area  
Hotspot Outer Limit

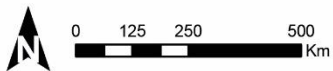

# Coastal Forests of Eastern Africa

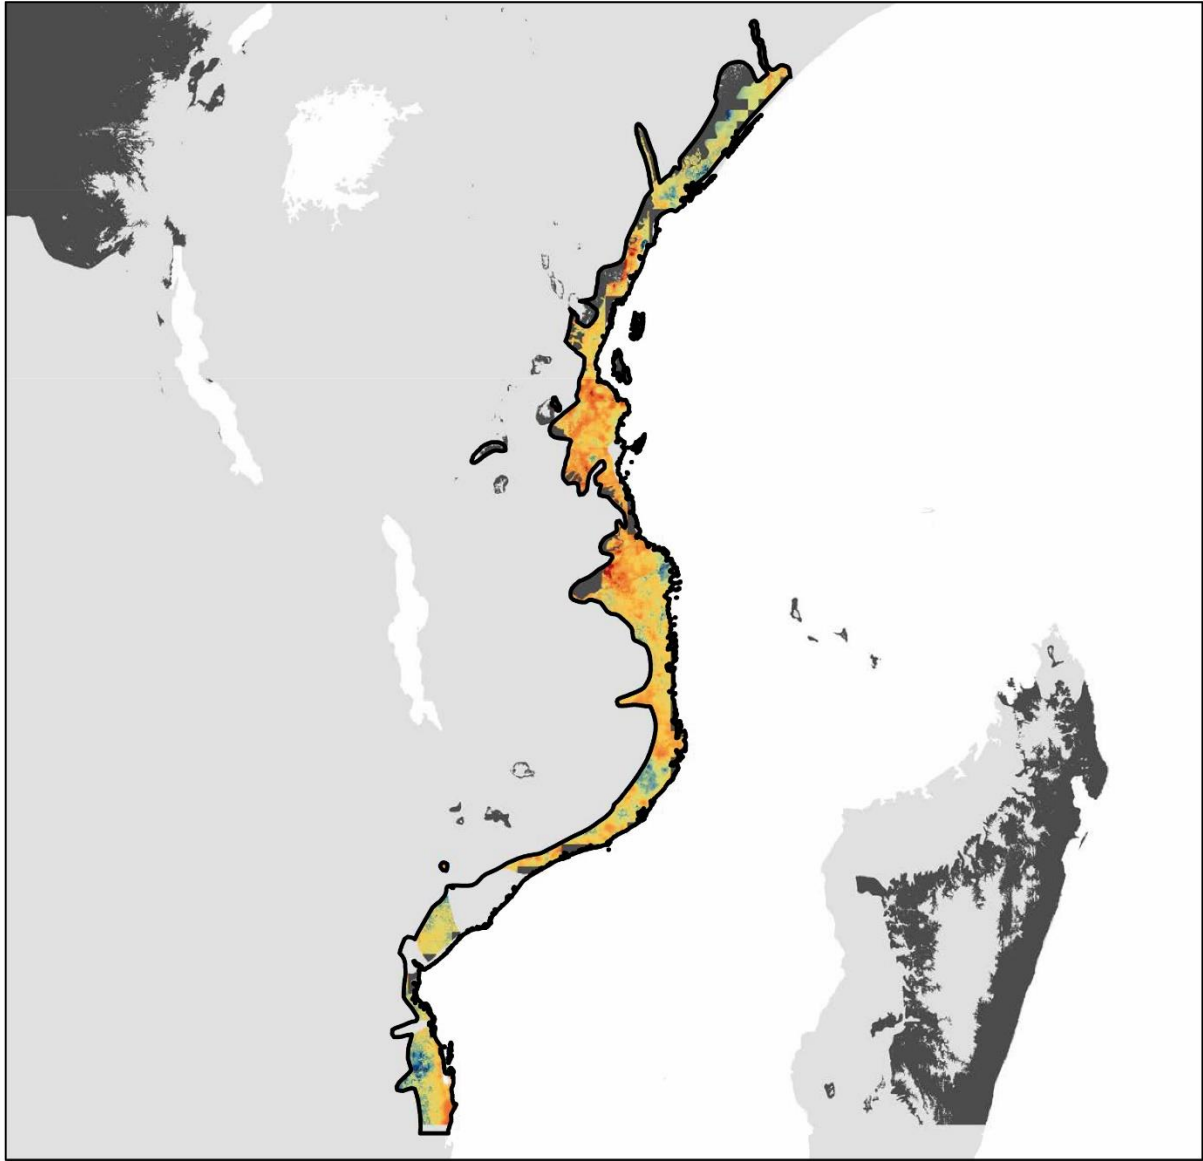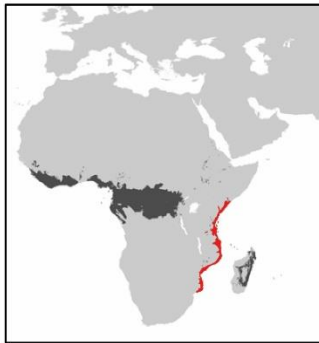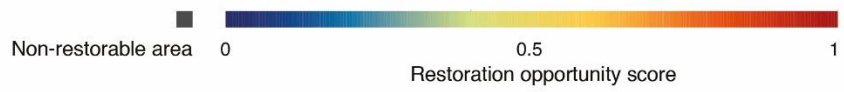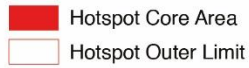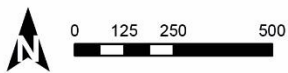

# Caribbean Islands

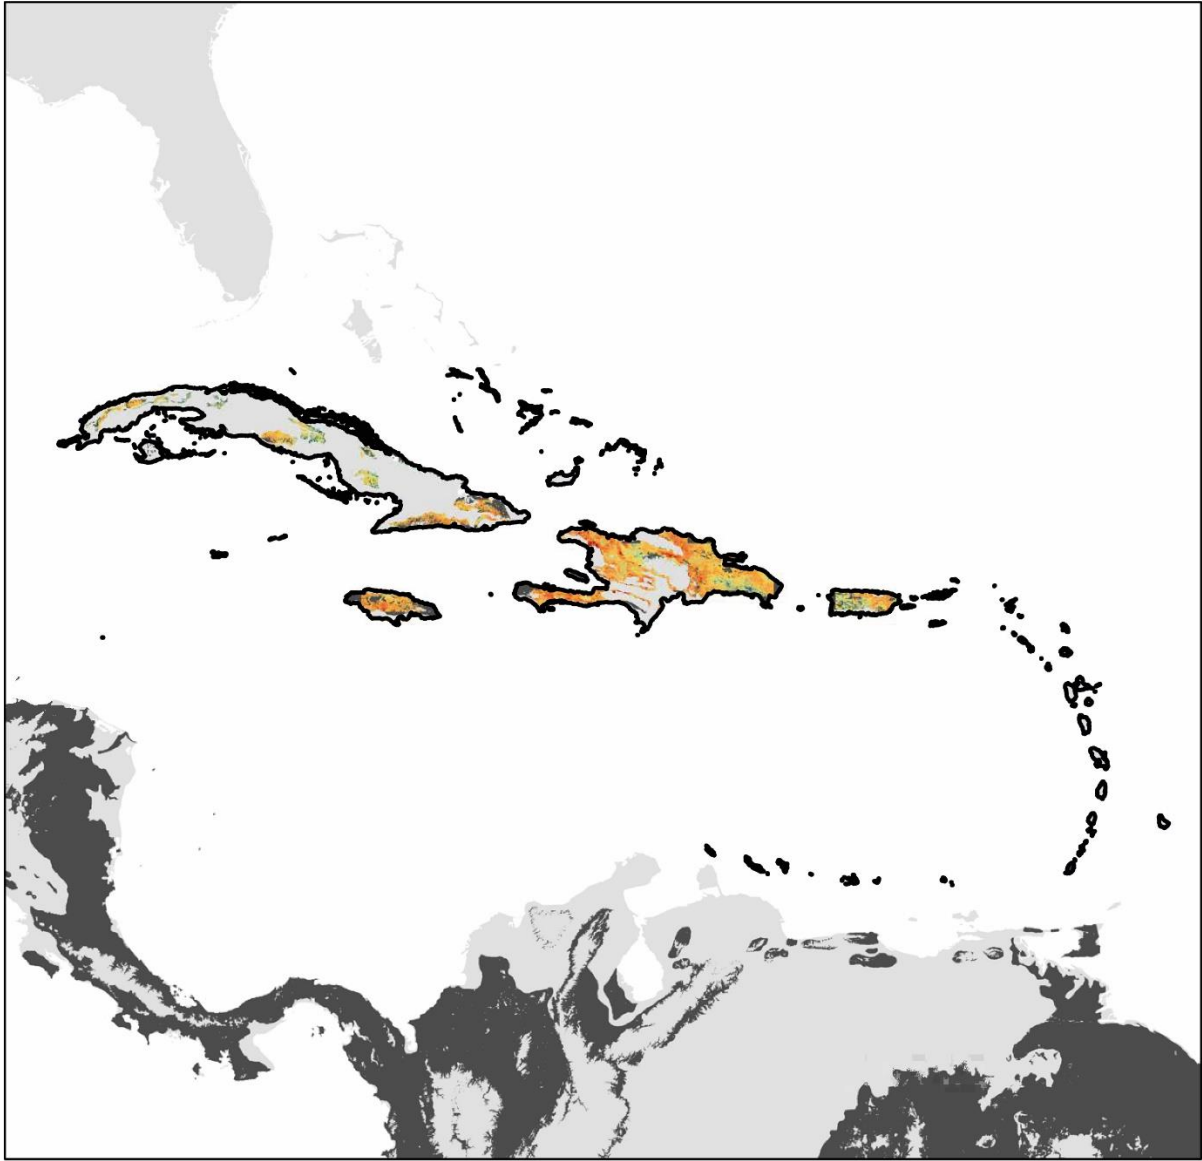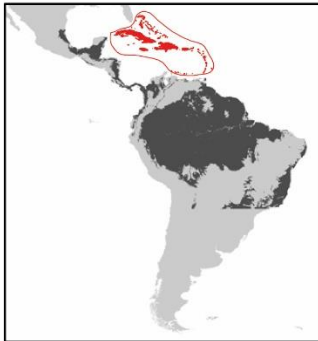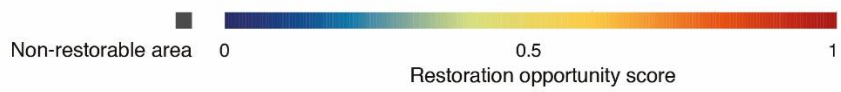

- Hotspot Core Area
- Hotspot Outer Limit

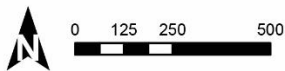

# Eastern Afrotontane

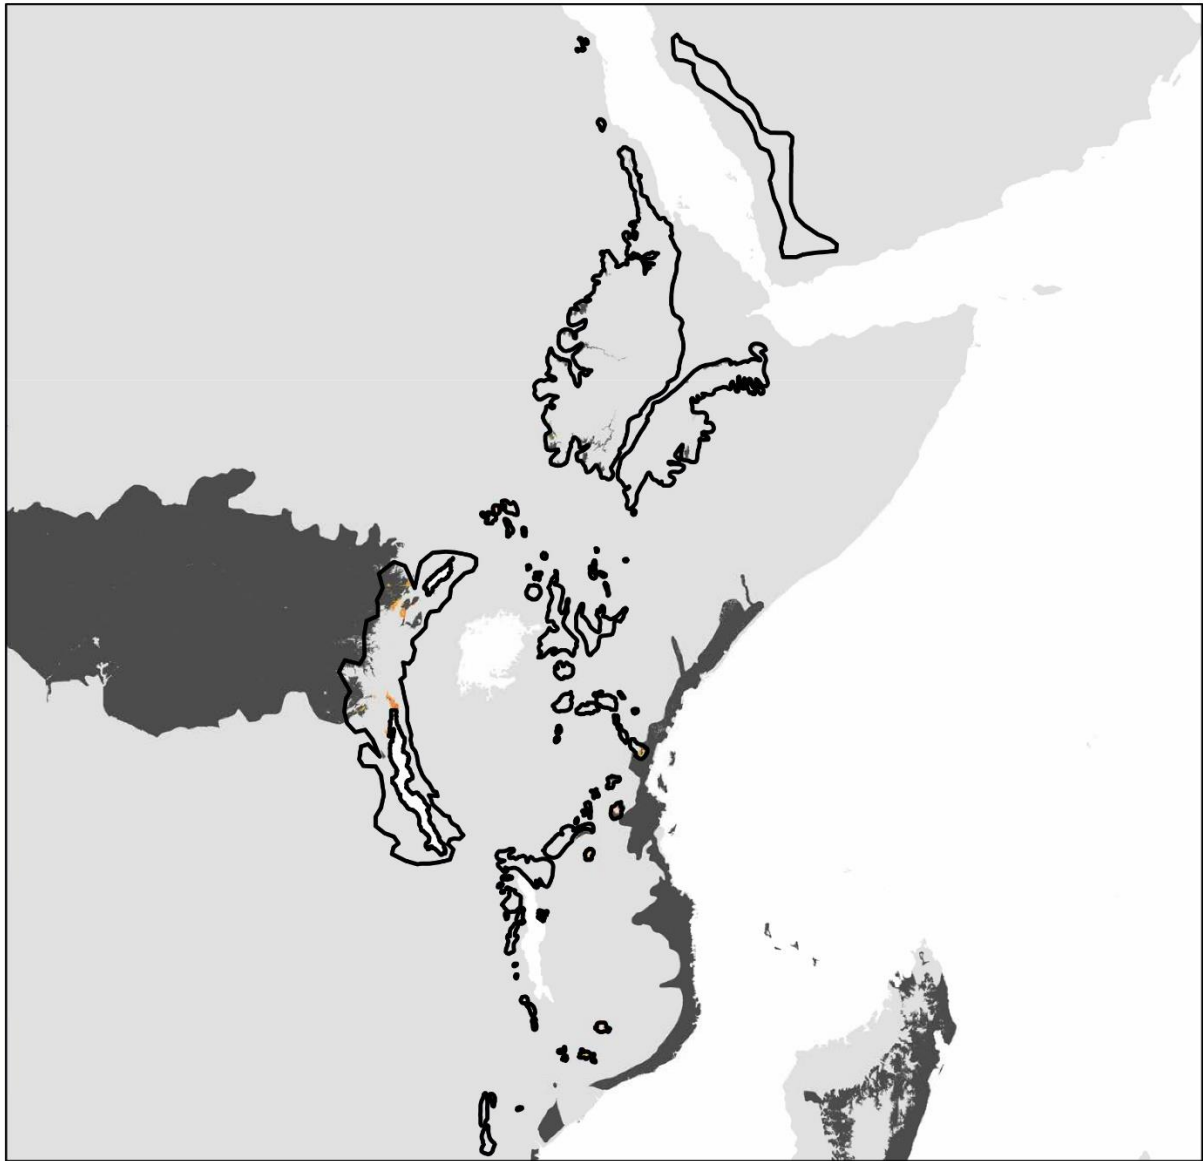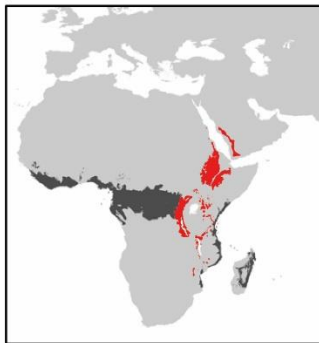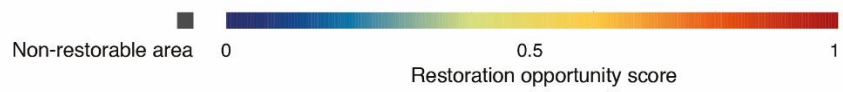

- Hotspot Core Area
- Hotspot Outer Limit

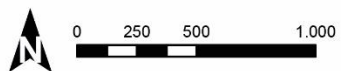

# East Melanesian Islands

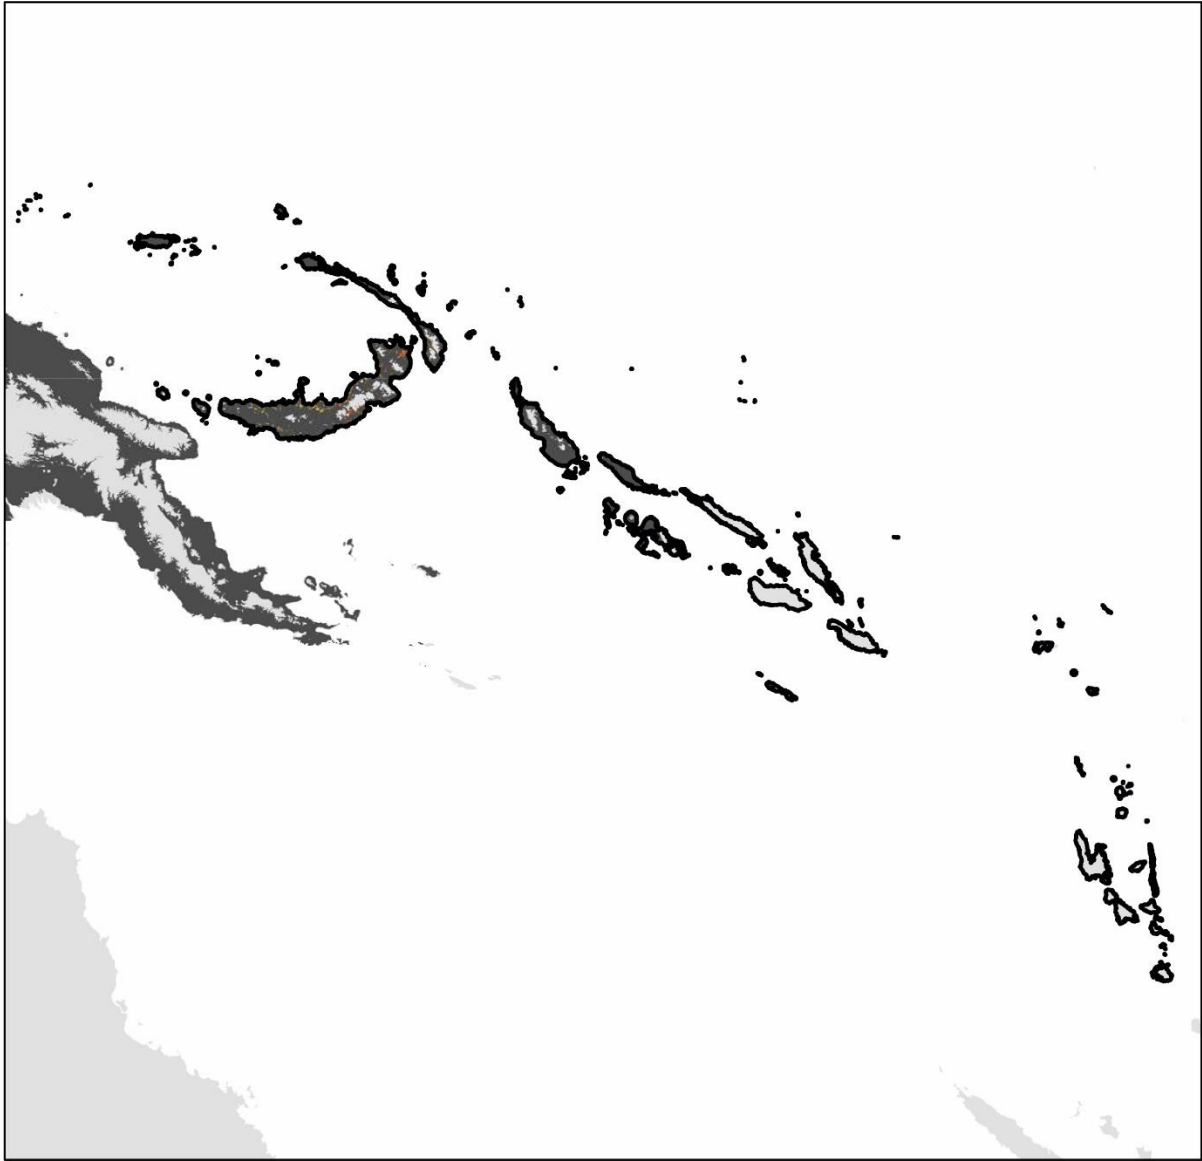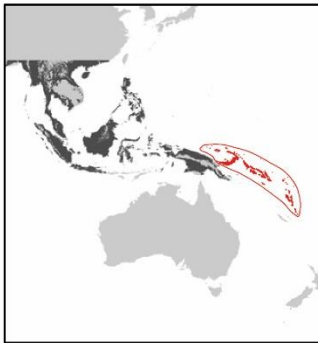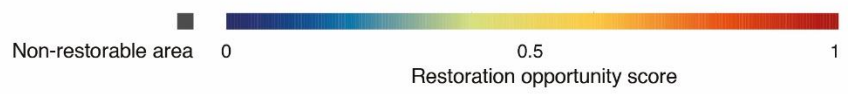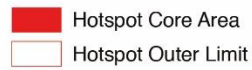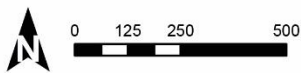



# Guinean Forests of West Africa

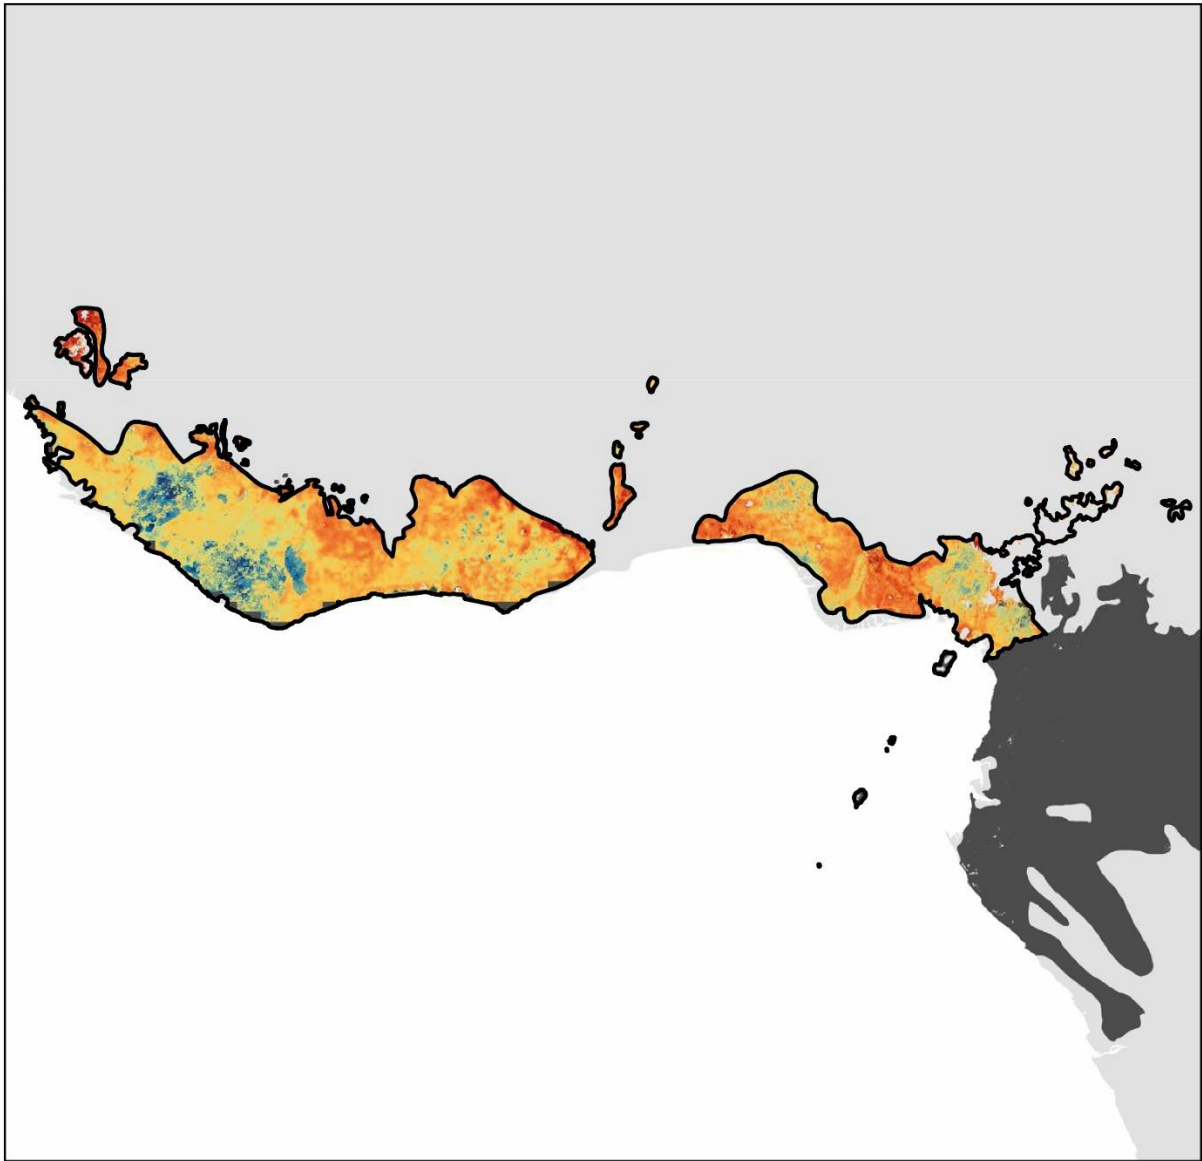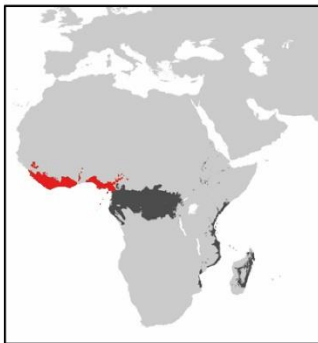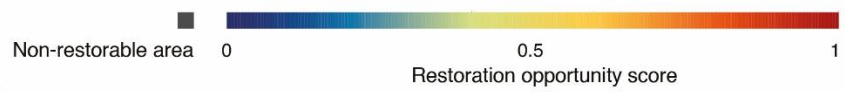

- Hotspot Core Area
- Hotspot Outer Limit

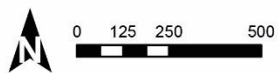

# Indo-Burma

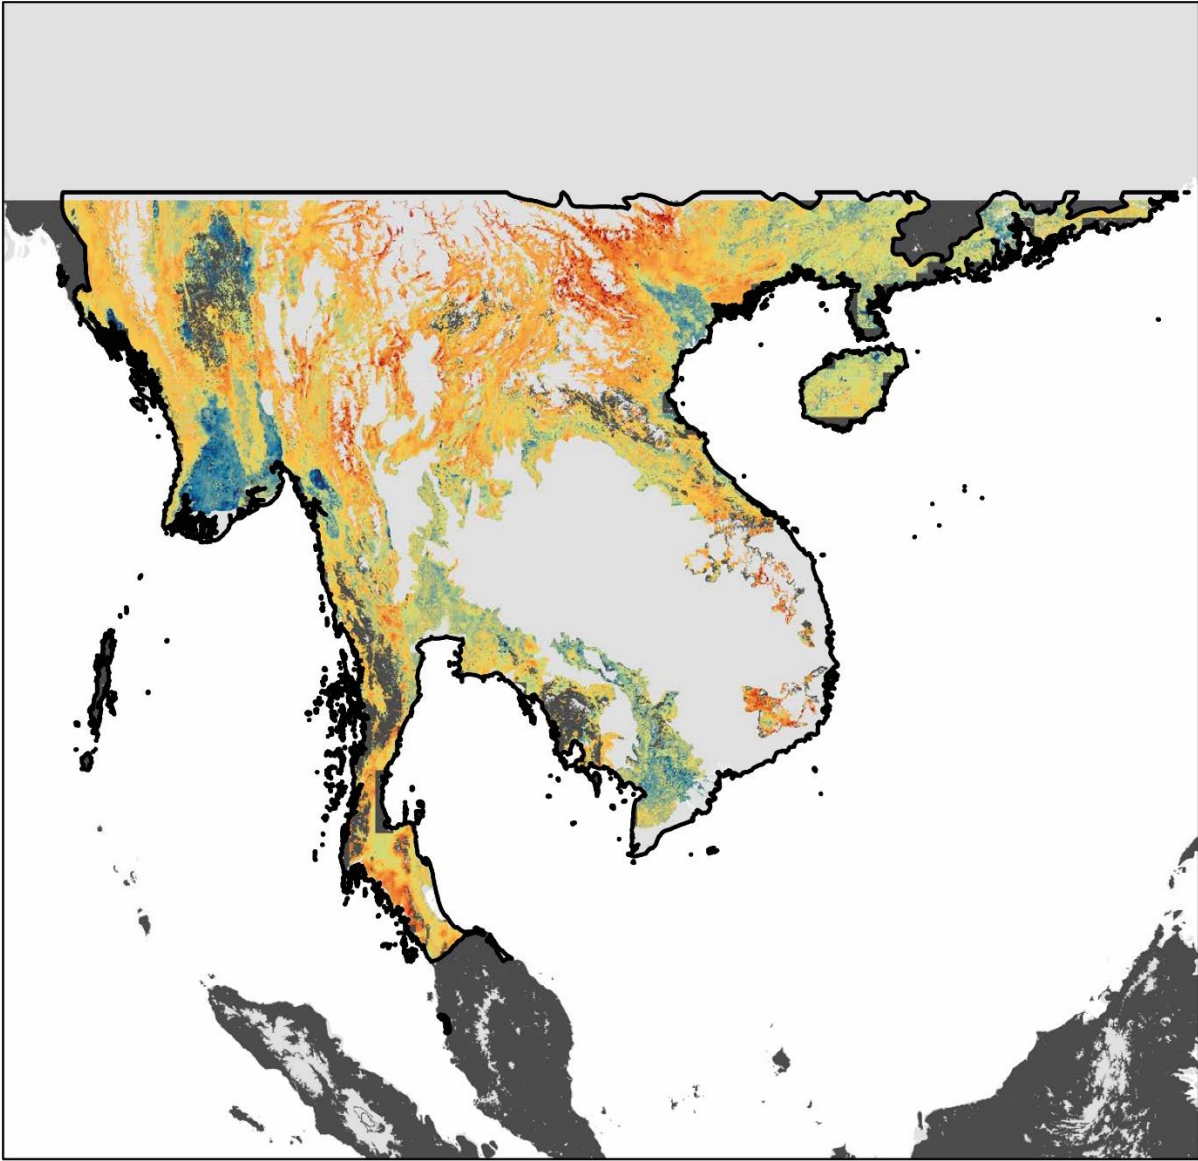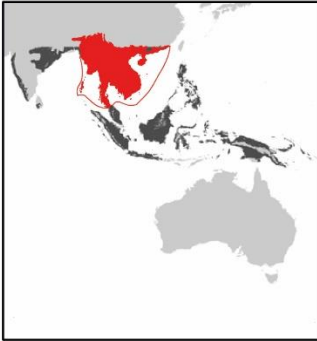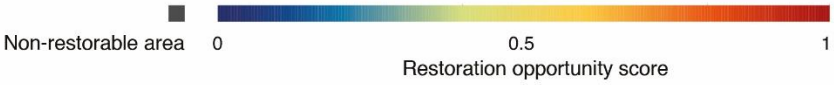

- Hotspot Core Area
- Hotspot Outer Limit

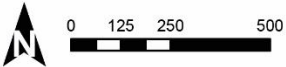

# Mesoamerica

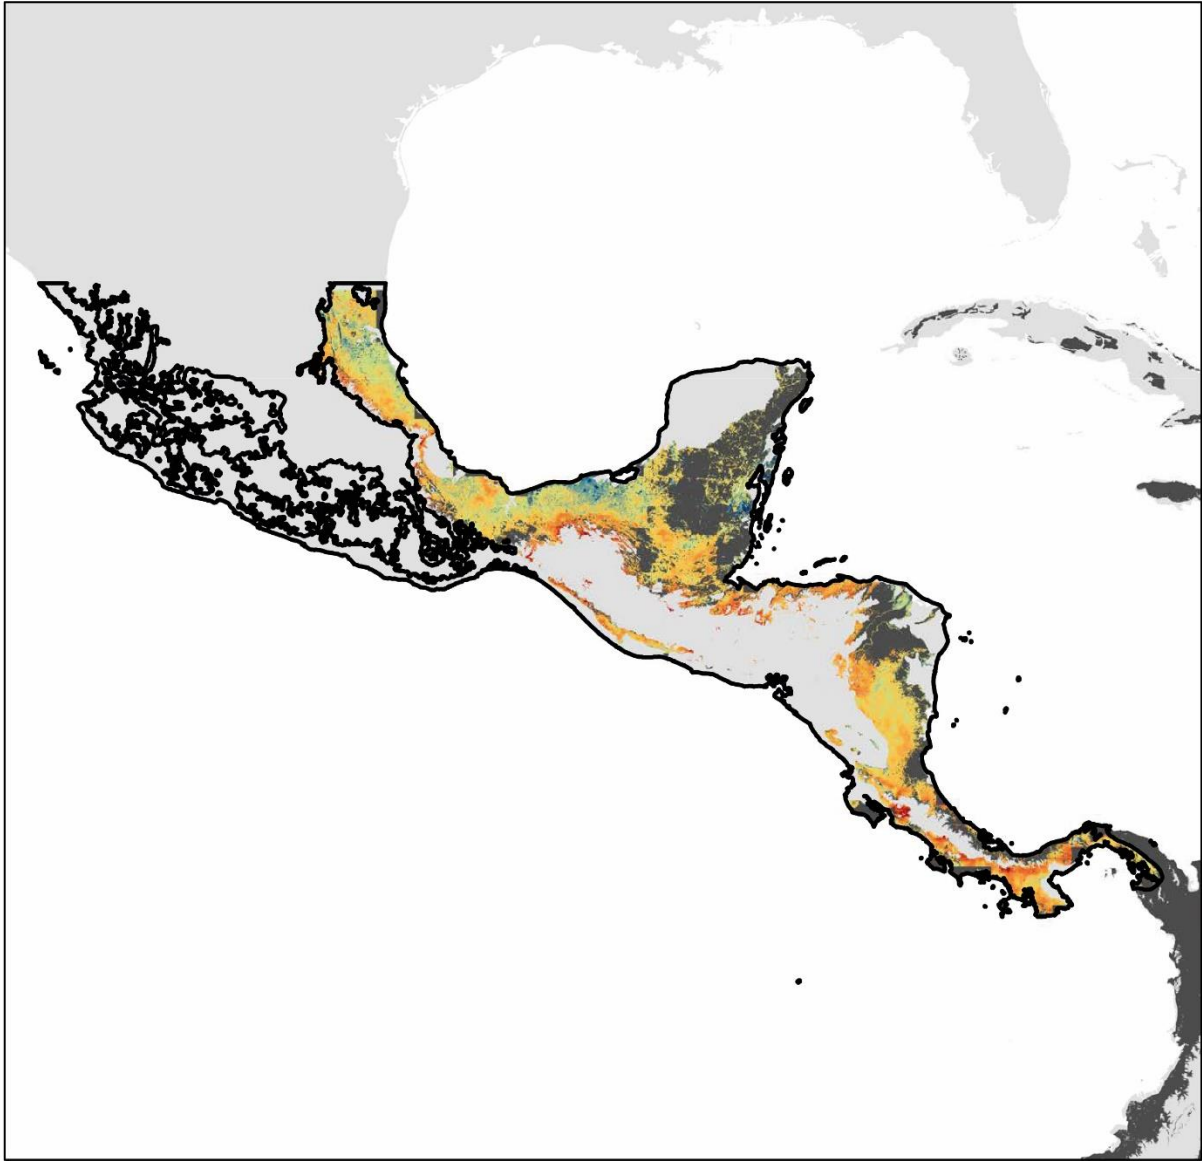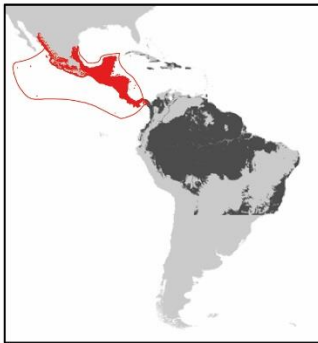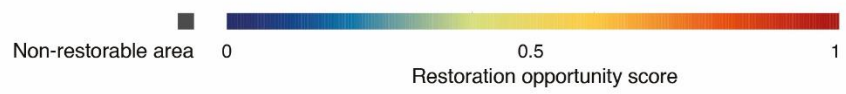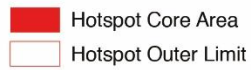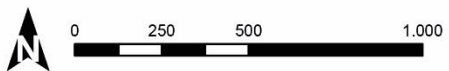

# Madagascar and the Indian Ocean Islands

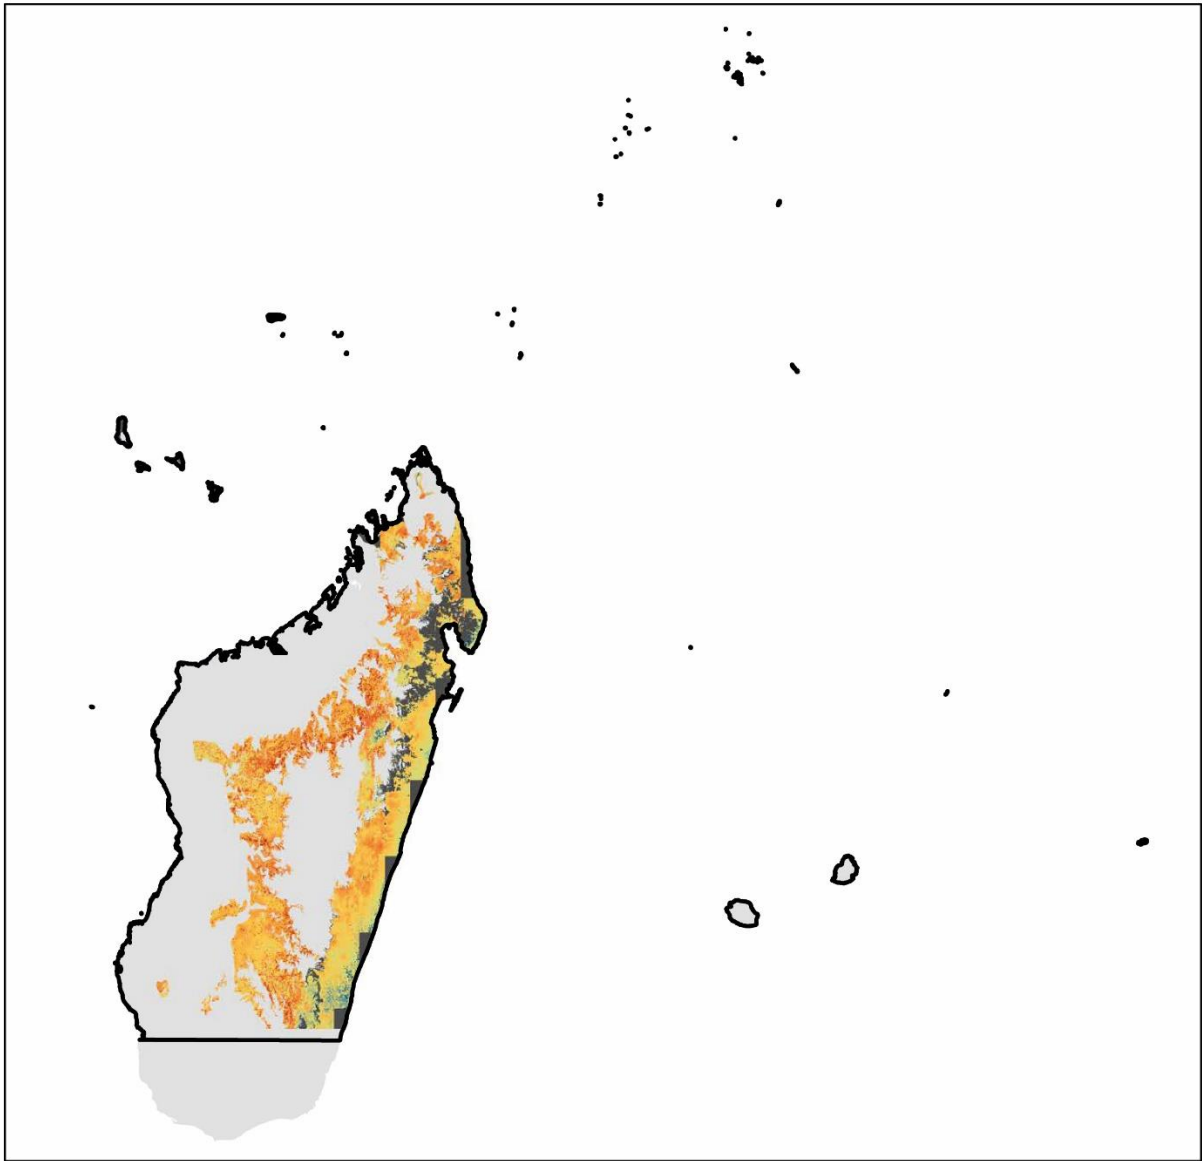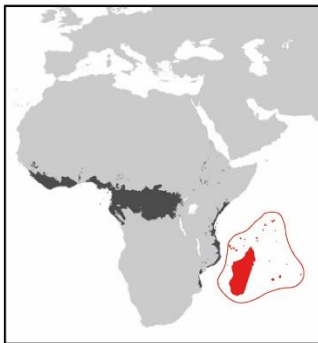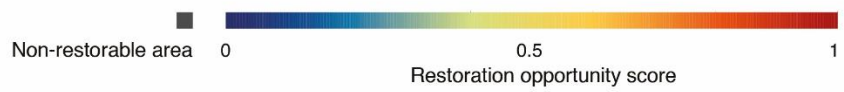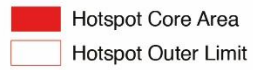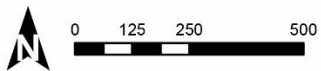

# Philippines

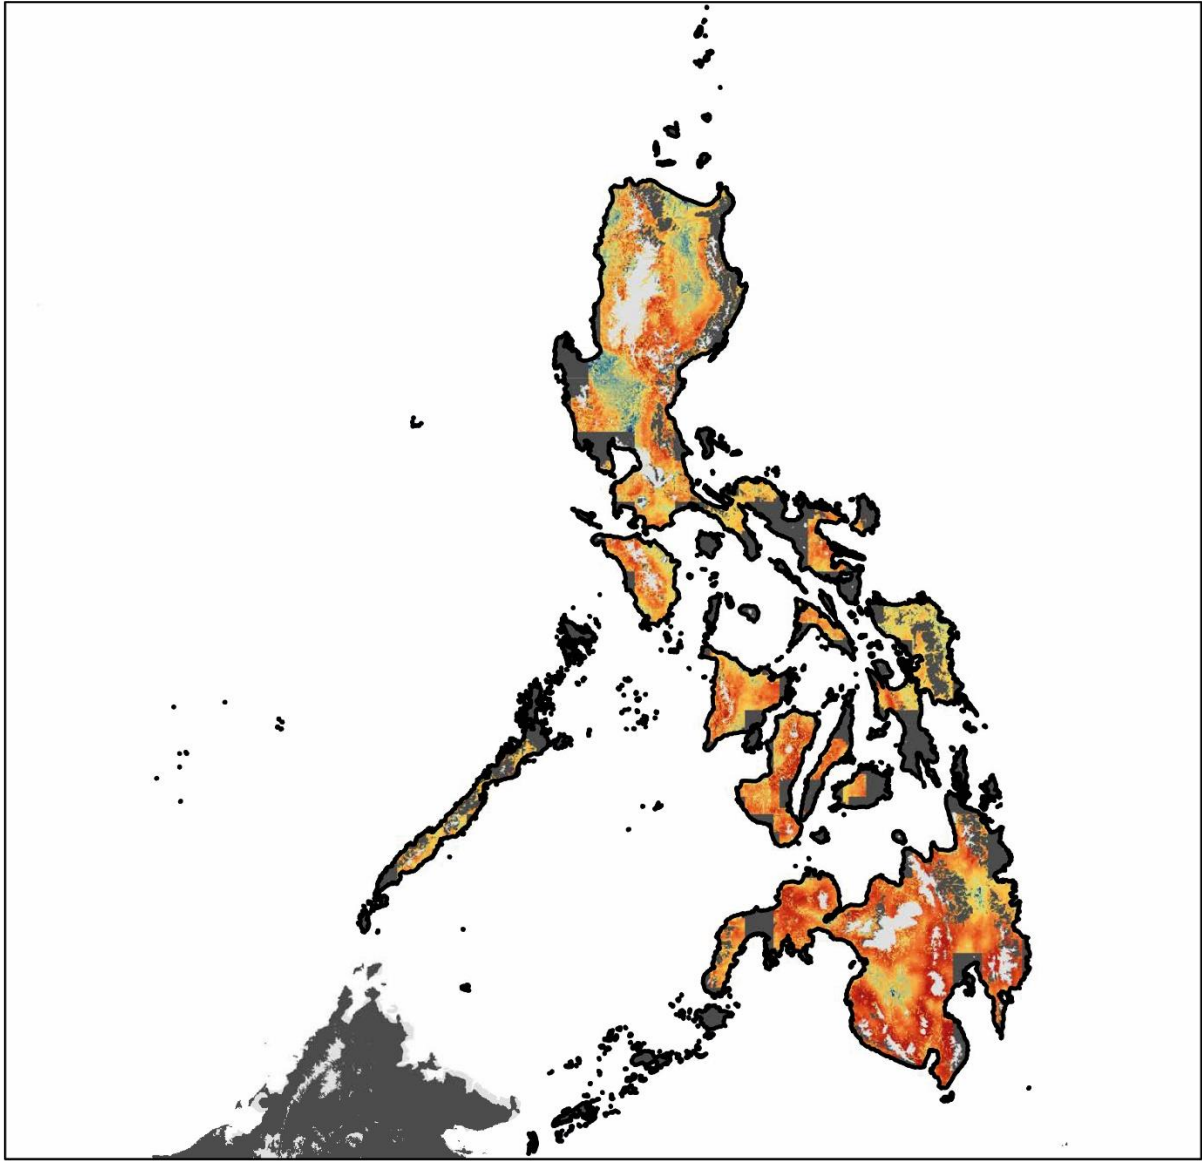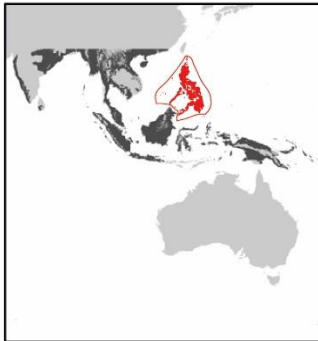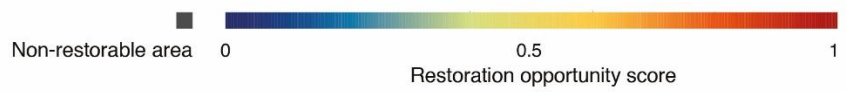

- Hotspot Core Area
- Hotspot Outer Limit

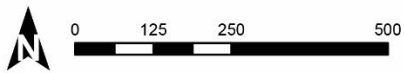



# Sundaland

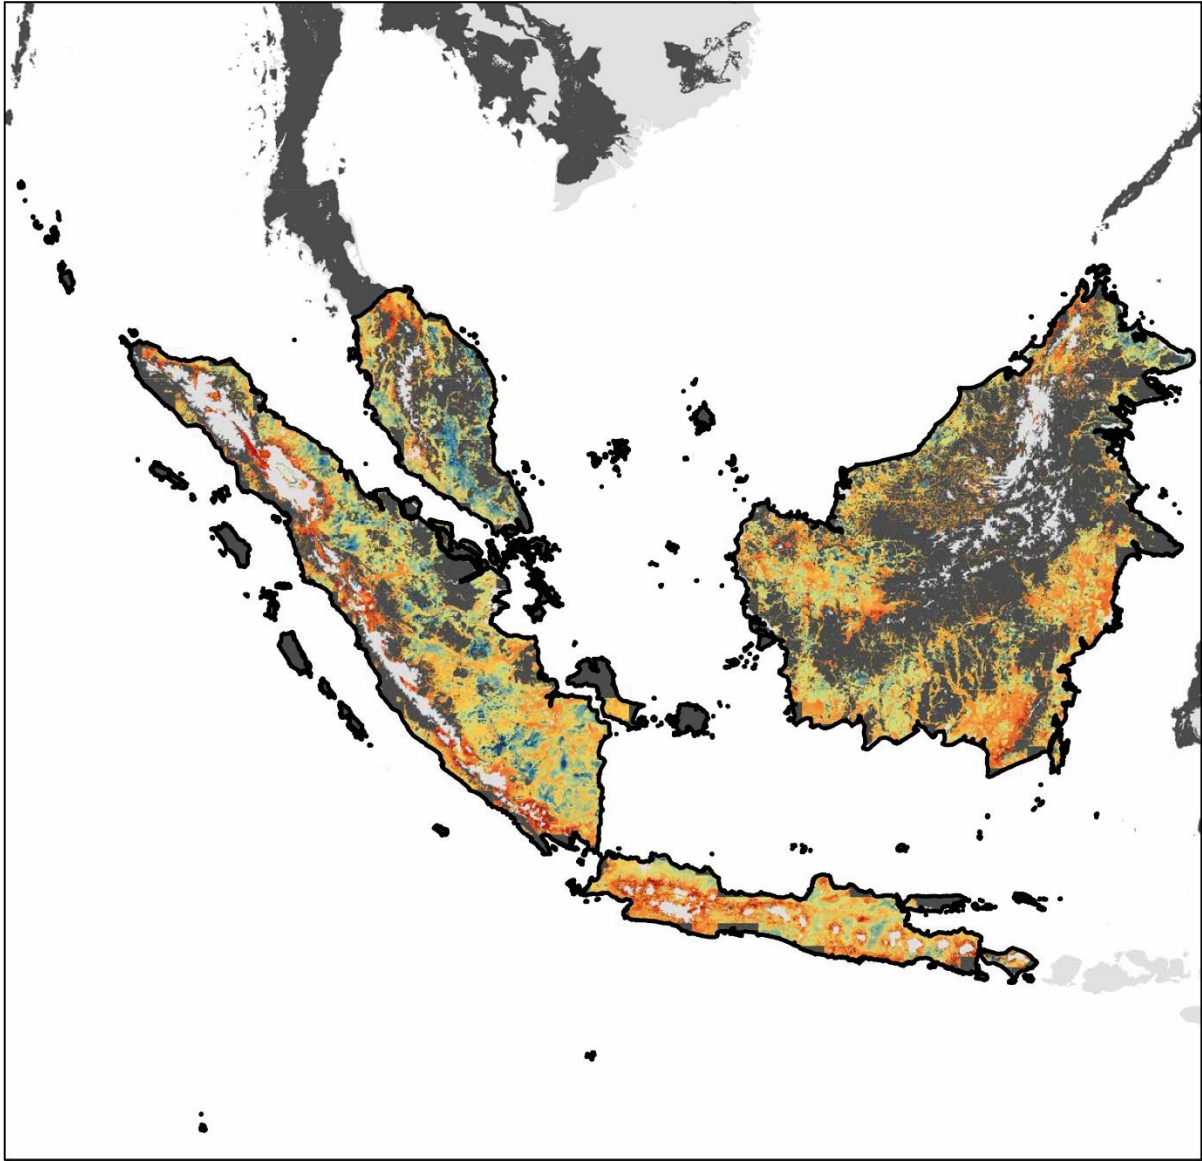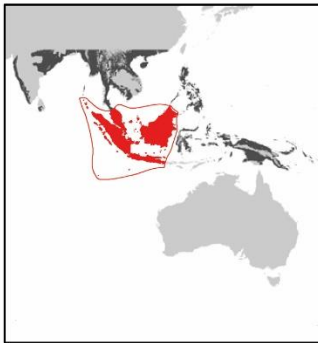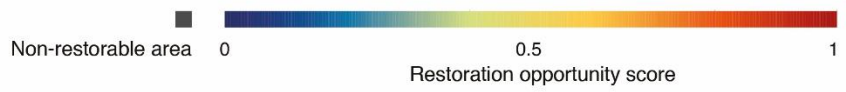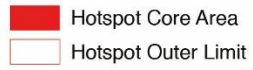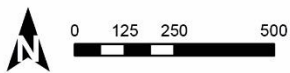

# Tropical Andes

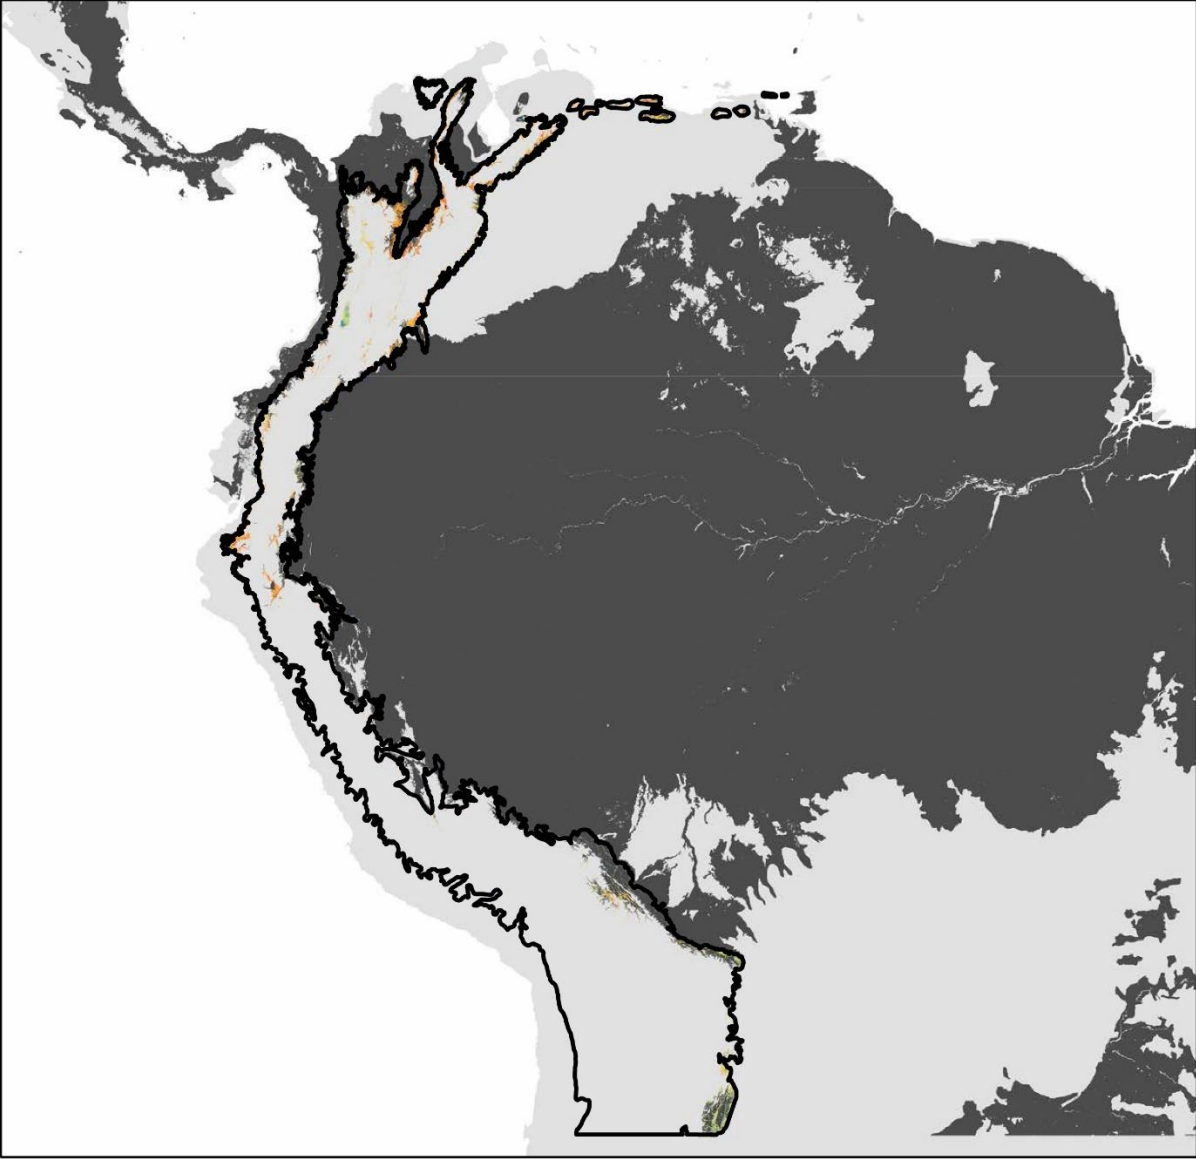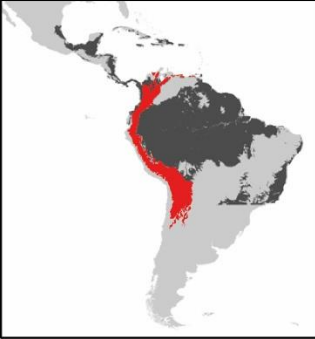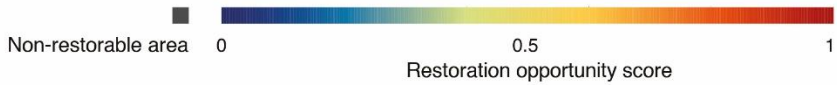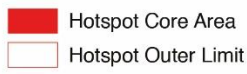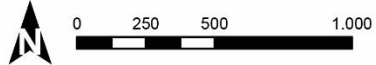

# Tumbes-Choco-Magdalena

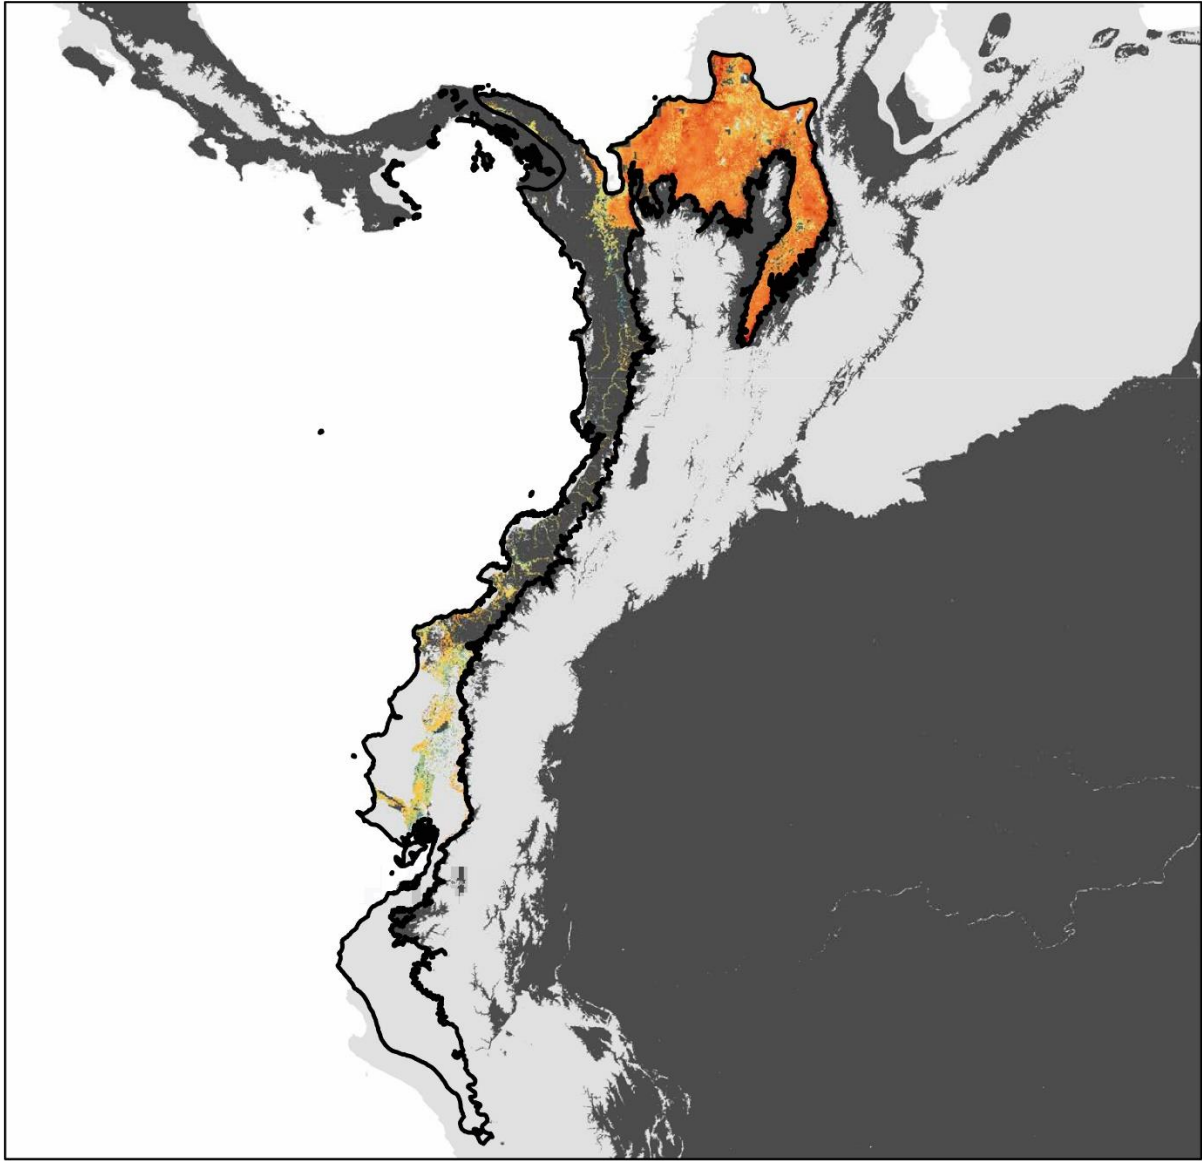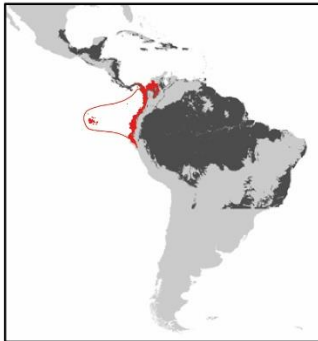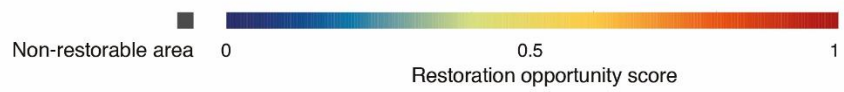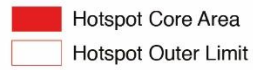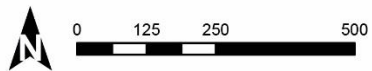

# Wallacea

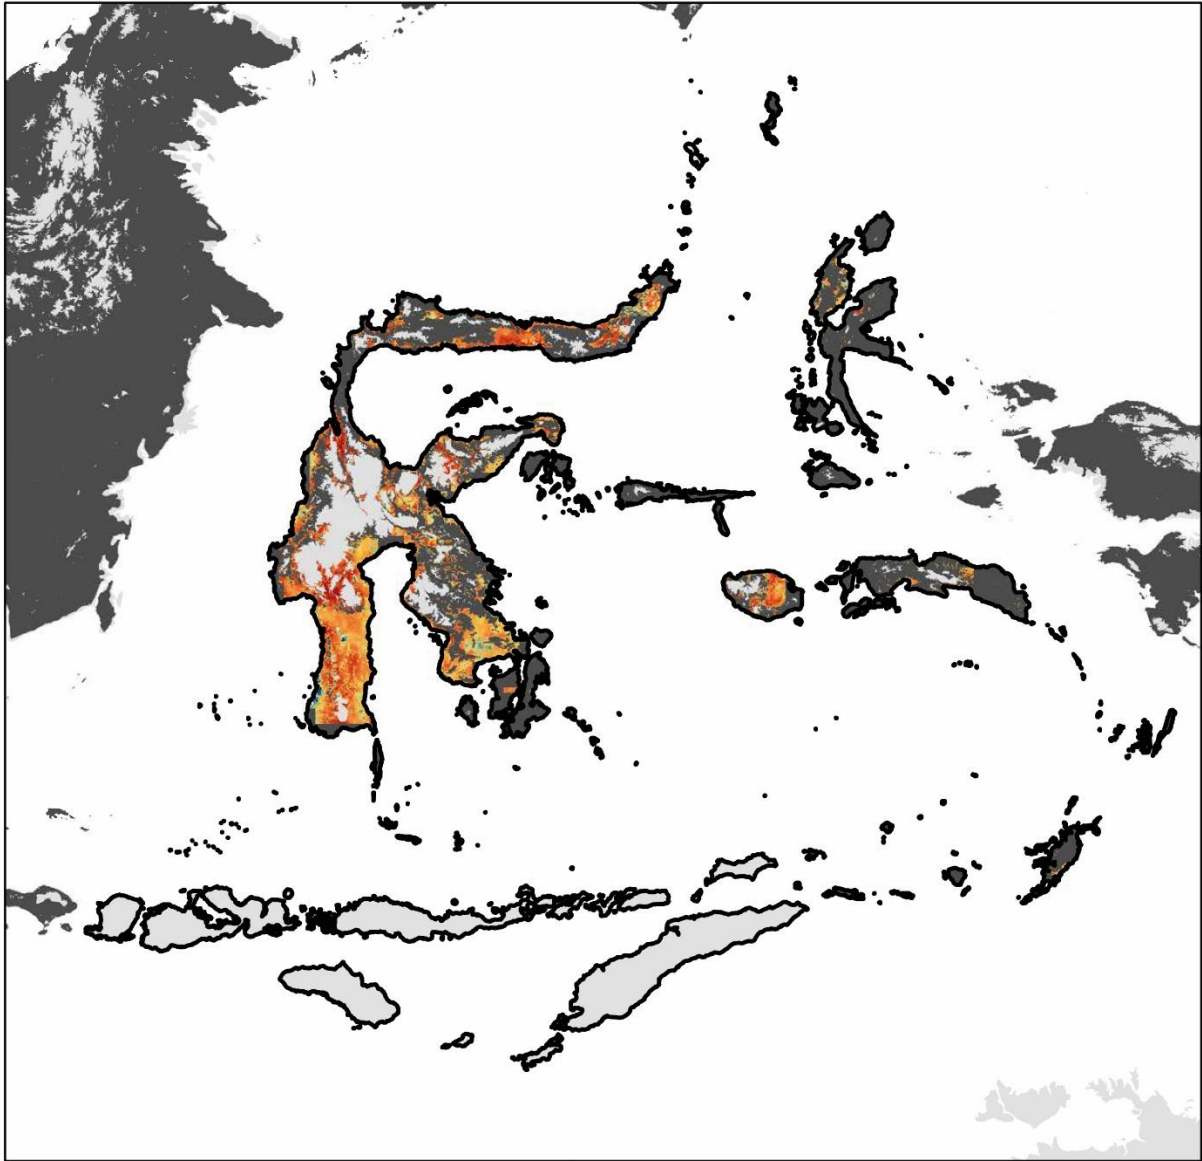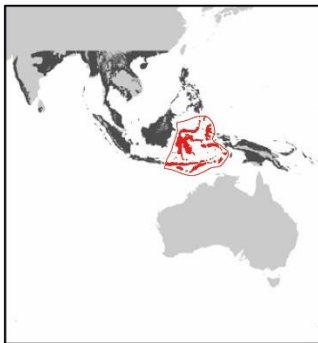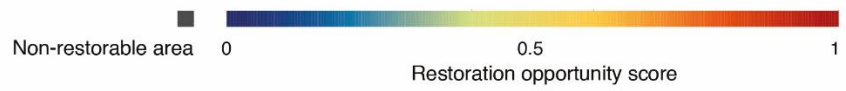

- Hotspot Core Area
- Hotspot Outer Limit

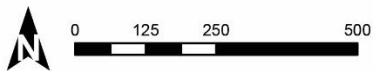

## Western Ghats and Sri Lanka

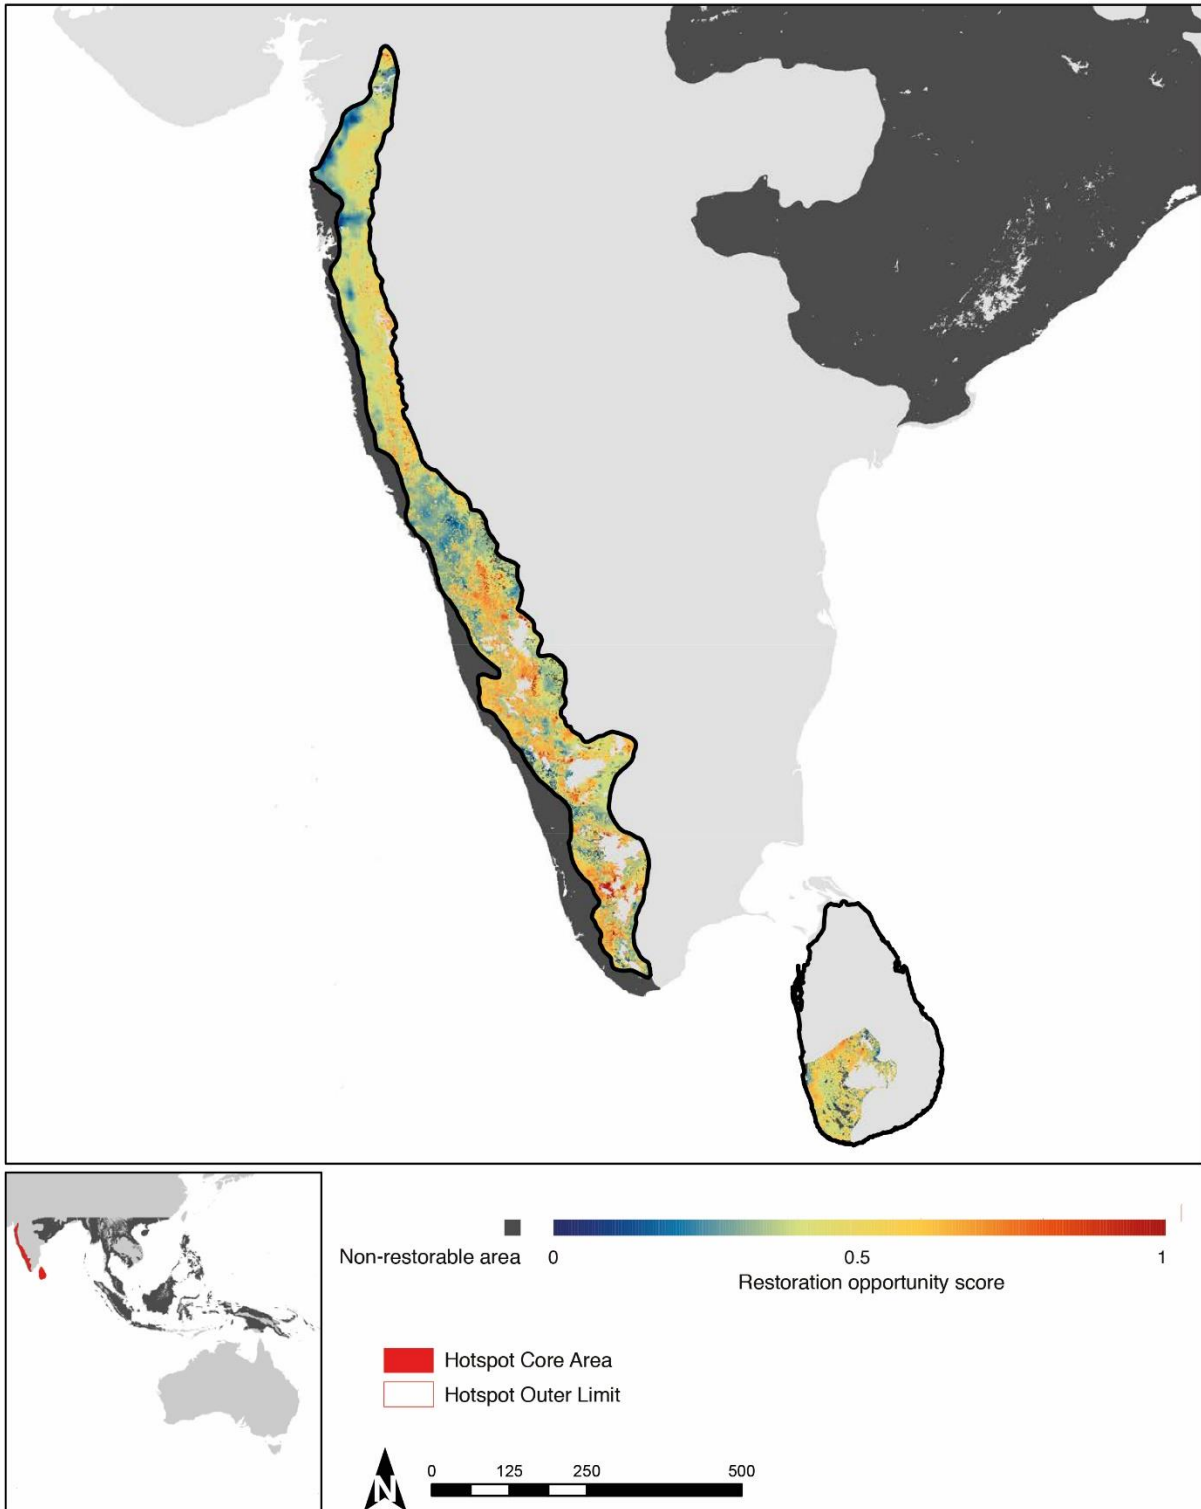

**Fig. S4. ROS of tropical rainforest landscapes of global hotspots for biodiversity conservation, with data renormalized for each hotspot.**



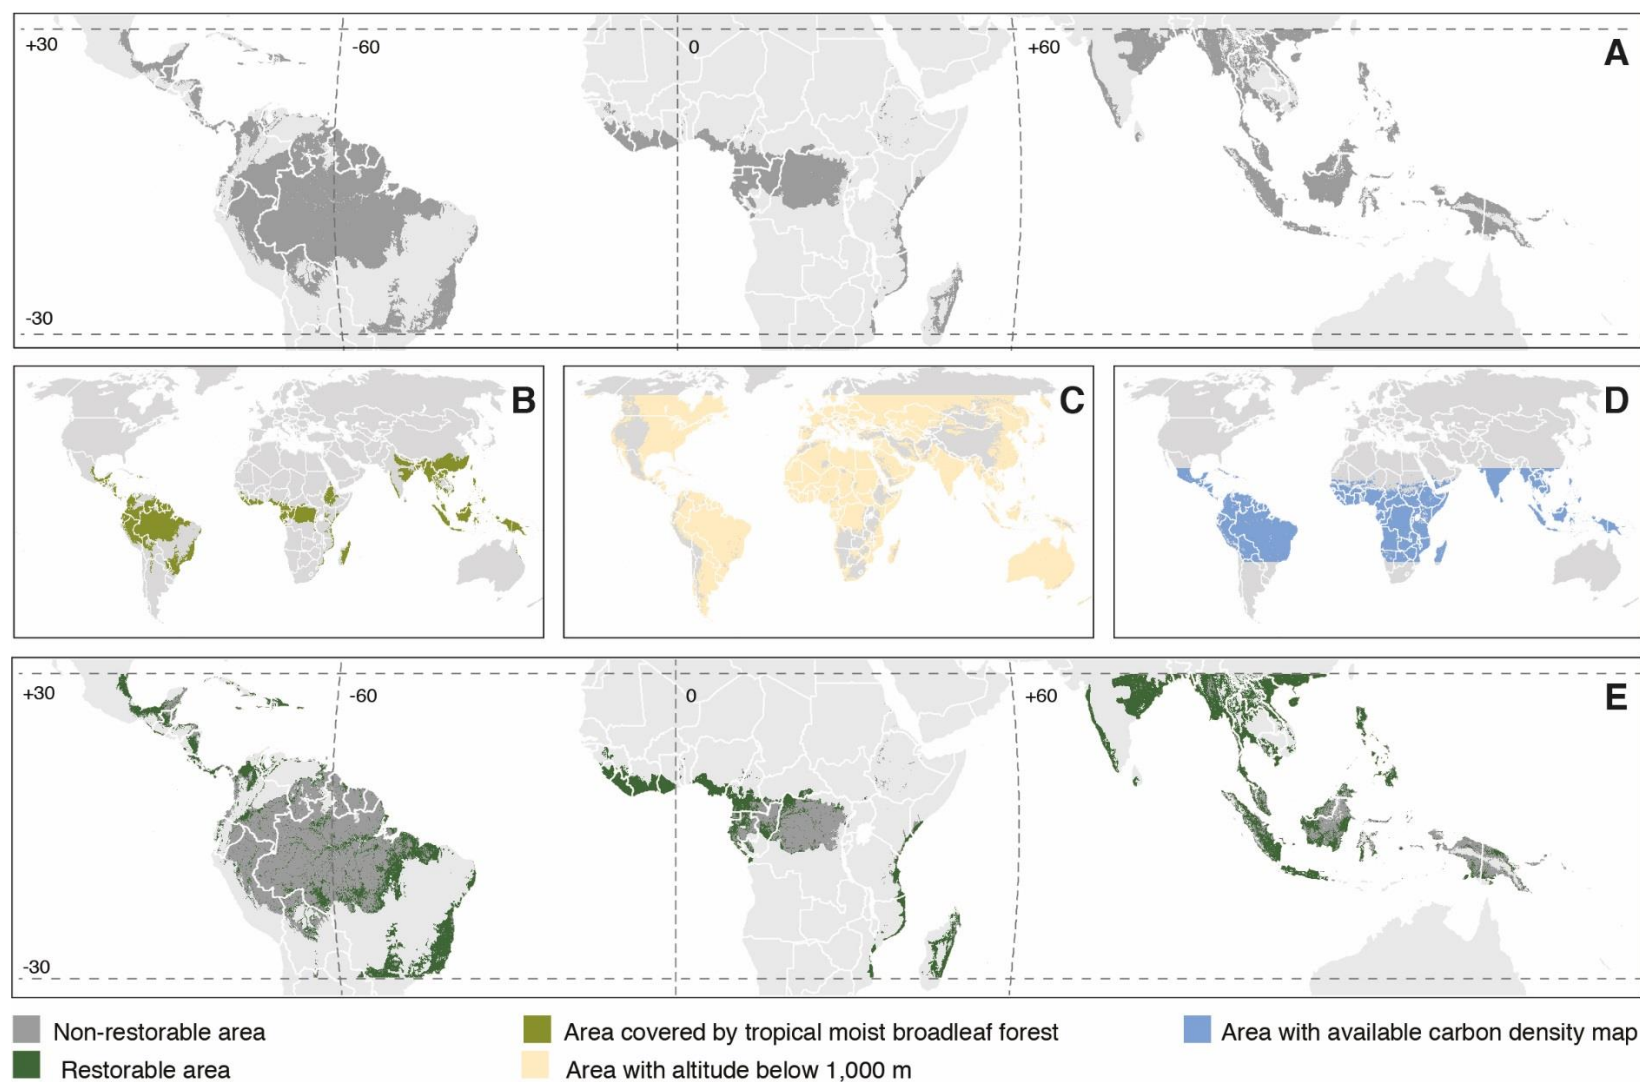

**Fig. S5. Identification of restorable areas.** Study area (A), obtained by overlapping areas covered by tropical moist broadleaf forests (B), with altitudes below 1,000 m asl (C), and with available carbon density maps (D), and restorable area (E), obtained by overlapping areas <90% tree canopy cover and not covered by urban areas and water bodies. The depiction of boundaries and geographic names is simply for display purposes and does not imply views regarding the legal status of any territory or country.

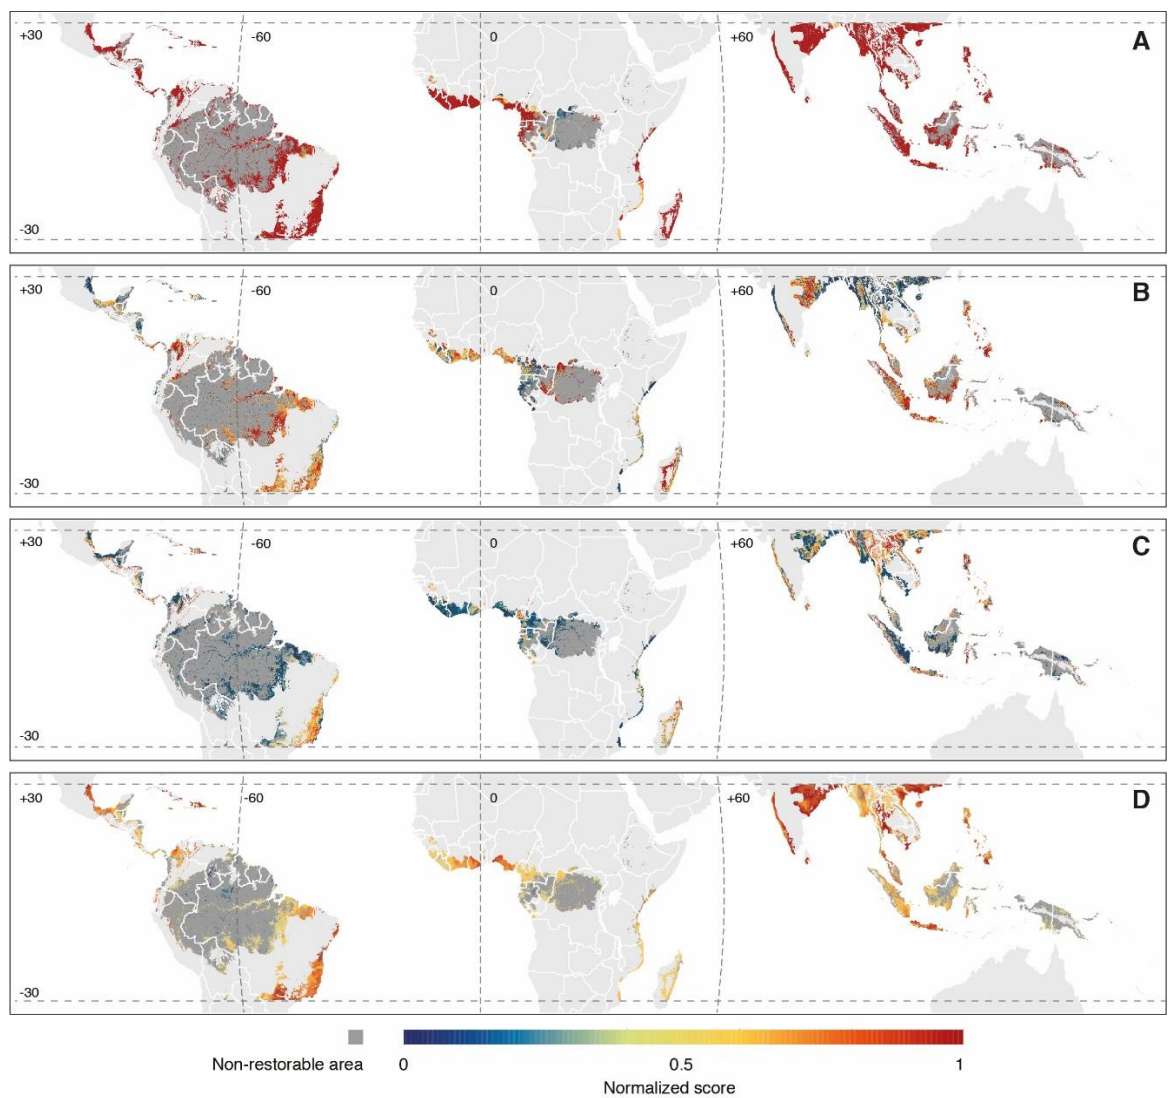

**Fig. S6. Restoration benefits.** Normalized scores of restoration benefits for biodiversity conservation (A), climate change mitigation (aboveground biomass accumulation potential of restored forests; B), climate change adaptation (velocity of climate change; C), and reducing water security water threat to humans (D). The higher is the score, the higher is the expected benefit. The depiction of boundaries and geographic names is simply for display purposes and does not imply views regarding the legal status of any territory or country.

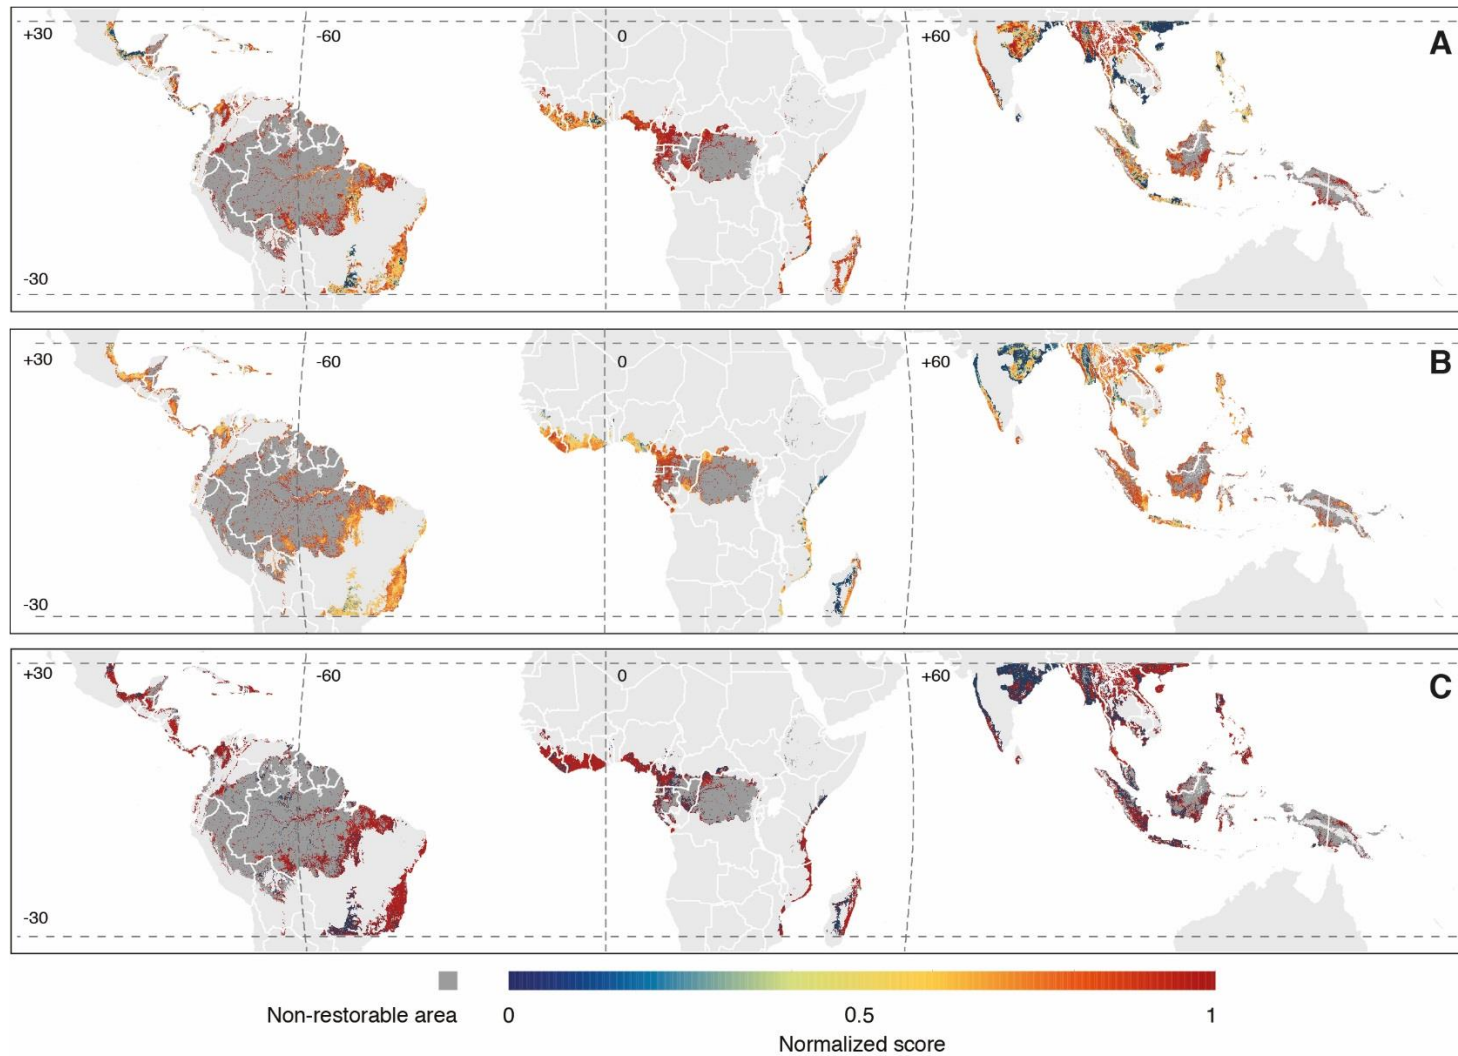

**Fig. S7. Restoration feasibility factors.** Normalized scores of restoration feasibility factors for land opportunity costs (expressed as the economic benefits from agricultural lands; A), landscape variation in forest restoration success (measured in terms of the variation of biodiversity recolonization of restoration sites in relation to reference ecosystem levels; B), and persistence chances of tropical restored forests (C). The higher is the score, the higher is restoration feasibility. The depiction of boundaries and geographic names is simply for display purposes and does not imply views regarding the legal status of any territory or country.

**Table S1. Country's ROS, restorable area, and restorable area with a restoration score of >0.6 of tropical rainforest landscapes and their national pledges to the Bonn Challenge.**

| Country         | Continent        | Restoration Score        |                    | Restorable Area (km <sup>2</sup> ) | Restoration Score $\geq 0.6$ (km <sup>2</sup> ) | Bonn Challenge pledge (km <sup>2</sup> ) |
|-----------------|------------------|--------------------------|--------------------|------------------------------------|-------------------------------------------------|------------------------------------------|
|                 |                  | mean                     | standard deviation |                                    |                                                 |                                          |
| Angola          | Africa           | 0.475                    | 0.08               | 2,383                              | 16                                              |                                          |
| Argentina       | South America    | 0.486                    | 0.09               | 5,999                              | 213                                             |                                          |
| Bangladesh      | Asia             | 0.311                    | 0.16               | 46,460                             | 687                                             |                                          |
| Belize          | North America    | 0.351                    | 0.12               | 8,393                              | 34                                              |                                          |
| Benin           | Africa           | 0.612                    | 0.13               | 1,666                              | 789                                             | 5,000                                    |
| Bolivia         | South America    | 0.433                    | 0.12               | 88,513                             | 6,243                                           |                                          |
| Brazil          | South America    | 0.532                    | 0.13               | 1,888,369                          | 613,720                                         | 130,000                                  |
| Brunei          | Asia             | 0.432                    | 0.10               | 1,751                              | 17                                              |                                          |
| Burundi         | Africa           | 0.691                    | 0.10               | 1,137                              | 795                                             |                                          |
| Cambodia        | Asia             | 0.412                    | 0.11               | 50,942                             | 2,032                                           |                                          |
| Cameroon        | Africa           | 0.440                    | 0.15               | 198,213                            | 27,636                                          | 120,600                                  |
| Central African | Africa           | 0.335                    | 0.14               | 47,409                             | 619                                             | 35,000                                   |
| China           | Asia             | 0.451                    | 0.11               | 271,789                            | 22,822                                          |                                          |
| Colombia        | South America    | 0.581                    | 0.14               | 213,122                            | 120,959                                         | 10,000                                   |
| Congo           | Africa           | 0.396                    | 0.13               | 88,035                             | 3,843                                           |                                          |
| Costa Rica      | North America    | 0.564                    | 0.10               | 28,195                             | 7,902                                           | 10,000                                   |
| Côte d'Ivoire   | Africa           | 0.572                    | 0.10               | 173,808                            | 74,359                                          | 50,000                                   |
| Cuba            | North America    | 0.549                    | 0.12               | 20,210                             | 7,600                                           |                                          |
| Dem. Rep.       | Africa           | 0.418                    | 0.13               | 211,386                            | 8,692                                           | 80,000                                   |
| Dominican Rep.  | North America    | 0.611                    | 0.10               | 33,564                             | 19,475                                          |                                          |
| Ecuador         | South America    | 0.524                    | 0.15               | 30,267                             | 8,367                                           | 5,000                                    |
| El Salvador     | North America    | 0.597                    | 0.12               | 331                                | 134                                             | 10,000                                   |
| Eq. Guinea      | Africa           | 0.458                    | 0.10               | 18,266                             | 271                                             |                                          |
| Ethiopia        | Africa           | 0.488                    | 0.12               | 1,497                              | 310                                             |                                          |
| France          | Europe           | 0.403                    | 0.13               | 3,597                              | 86                                              |                                          |
| Gabon           | Africa           | 0.382                    | 0.12               | 120,158                            | 2,184                                           |                                          |
| Ghana           | Africa           | 0.586                    | 0.11               | 93,181                             | 40,228                                          | 20,000                                   |
| Guatemala       | North America    | 0.533                    | 0.09               | 45,961                             | 9,029                                           | 12,400                                   |
| Guinea          | Africa           | 0.629                    | 0.13               | 52,027                             | 31,244                                          | 20,000                                   |
| Guyana          | South America    | 0.439                    | 0.13               | 23,503                             | 2,489                                           |                                          |
| Haiti           | North America    | 0.646                    | 0.10               | 20,930                             | 12,645                                          |                                          |
| Honduras        | North America    | 0.567                    | 0.12               | 22,672                             | 10,510                                          | 10,000                                   |
| Hong Kong       | Asia             | 0.472                    | 0.10               | 950                                | 11                                              |                                          |
| India           | Asia             | 0.510                    | 0.12               | 720,437                            | 150,037                                         | 210,000                                  |
| Indonesia       | Asia             | 0.508                    | 0.14               | 913,516                            | 231,622                                         | 51,000                                   |
| Jamaica         | North America    | 0.642                    | 0.08               | 7,228                              | 4,566                                           |                                          |
| Kenya           | Africa           | 0.453                    | 0.14               | 23,626                             | 2,639                                           | 51,000                                   |
| Laos            | Asia             | 0.548                    | 0.10               | 148,475                            | 47,979                                          |                                          |
| Liberia         | Africa           | 0.395                    | 0.12               | 109,699                            | 817                                             | 10,000                                   |
| Madagascar      | Africa           | 0.647                    | 0.10               | 219,078                            | 146,863                                         | 40,000                                   |
| <b>Country</b>  | <b>Continent</b> | <b>Restoration Score</b> | <b>Restorable</b>  | <b>Restoratio</b>                  | <b>Bonn</b>                                     |                                          |

|              |               | <b>mean</b> | <b>standard deviation</b> | <b>Area (km<sup>2</sup>)</b> | <b>n Score <math>\geq 0.6</math> (km<sup>2</sup>)</b> | <b>Challenge pledge (km<sup>2</sup>)</b> |
|--------------|---------------|-------------|---------------------------|------------------------------|-------------------------------------------------------|------------------------------------------|
| Malawi       | Africa        | 0.643       | 0.10                      | 44                           | 26                                                    | 45,000                                   |
| Malaysia     | Asia          | 0.456       | 0.13                      | 173,455                      | 25,090                                                |                                          |
| Mexico       | North America | 0.458       | 0.12                      | 202,034                      | 24,181                                                | 97,000                                   |
| Mozambique   | Africa        | 0.470       | 0.12                      | 128,040                      | 11,893                                                | 10,000                                   |
| Myanmar      | Asia          | 0.482       | 0.14                      | 413,650                      | 81,272                                                |                                          |
| Nicaragua    | North America | 0.507       | 0.08                      | 52,166                       | 6,493                                                 | 27,000                                   |
| Nigeria      | Africa        | 0.605       | 0.12                      | 140,089                      | 81,884                                                | 40,000                                   |
| Panama       | North America | 0.560       | 0.11                      | 36,684                       | 12,468                                                | 10,000                                   |
| Papua New    | Oceania       | 0.471       | 0.14                      | 108,588                      | 15,193                                                |                                          |
| Paraguay     | South America | 0.582       | 0.09                      | 11,032                       | 6,282                                                 |                                          |
| Peru         | South America | 0.531       | 0.17                      | 61,392                       | 22,537                                                | 32,000                                   |
| Philippines  | Asia          | 0.578       | 0.13                      | 263,918                      | 95,093                                                |                                          |
| Puerto Rico  | North America | 0.543       | 0.11                      | 7,491                        | 2,304                                                 |                                          |
| Rwanda       | Africa        | 0.692       | 0.08                      | 23                           | 19                                                    |                                          |
| S. Sudan     | Africa        | 0.660       | 0.10                      | 1,325                        | 940                                                   |                                          |
| Sierra Leone | Africa        | 0.526       | 0.08                      | 54,282                       | 9,061                                                 |                                          |
| Somalia      | Africa        | 0.409       | 0.10                      | 19,974                       | 1,164                                                 |                                          |
| Sri Lanka    | Asia          | 0.540       | 0.09                      | 13,986                       | 3,951                                                 |                                          |
| Suriname     | South America | 0.419       | 0.12                      | 10,701                       | 551                                                   |                                          |
| Tanzania     | Africa        | 0.572       | 0.10                      | 72,151                       | 27,438                                                |                                          |
| Thailand     | Asia          | 0.508       | 0.13                      | 290,070                      | 76,123                                                |                                          |
| Togo         | Africa        | 0.667       | 0.10                      | 7,655                        | 5,943                                                 |                                          |
| Trinidad and | North America | 0.604       | 0.08                      | 2,217                        | 1,021                                                 |                                          |
| Uganda       | Africa        | 0.692       | 0.17                      | 231                          | 172                                                   | 25,000                                   |
| Venezuela    | South America | 0.524       | 0.16                      | 95,043                       | 35,411                                                |                                          |
| Vietnam      | Asia          | 0.537       | 0.15                      | 215,141                      | 88,637                                                |                                          |



**Table S2. Mean ROS, total area, restorable area, and restorable area with a restoration score of >0.6 of ecoregions within tropical rainforest landscapes.**

| <b>Ecoregion</b>                             | <b>Mean Restoration Score</b> | <b>Study Area (km<sup>2</sup>)</b> | <b>Restorable Area (km<sup>2</sup>)</b> | <b>Restoration Score <math>\geq</math>0.6 (km<sup>2</sup>)</b> |
|----------------------------------------------|-------------------------------|------------------------------------|-----------------------------------------|----------------------------------------------------------------|
| Albertine Rift montane forests               | 0.677                         | 8297                               | 4080                                    | 2989                                                           |
| Alto Paraná Atlantic forests                 | 0.504                         | 304701                             | 296907                                  | 84991                                                          |
| Amazon-Orinoco-Southern Caribbean mangroves  | 0.252                         | 101                                | 16                                      | 1                                                              |
| Apure-Villavicencio dry forests              | 0.596                         | 44                                 | 42                                      | 20                                                             |
| Atlantic Coast restingas                     | 0.453                         | 4619                               | 4391                                    | 260                                                            |
| Atlantic Equatorial coastal forests          | 0.433                         | 220290                             | 147416                                  | 5570                                                           |
| Bahamian-Antillean mangroves                 | 0.512                         | 7                                  | 6                                       | 0                                                              |
| Bahia coastal forests                        | 0.617                         | 129952                             | 116214                                  | 66657                                                          |
| Bahia interior forests                       | 0.640                         | 260998                             | 257364                                  | 192417                                                         |
| Banda Sea Islands moist deciduous forests    | 0.509                         | 8565                               | 4859                                    | 97                                                             |
| Belizian pine forests                        | 0.211                         | 2238                               | 1231                                    | 0                                                              |
| Beni savanna                                 | 0.345                         | 15940                              | 8536                                    | 13                                                             |
| Bolivian montane dry forests                 | 0.486                         | 242                                | 171                                     | 10                                                             |
| Bolivian Yungas                              | 0.541                         | 46827                              | 7802                                    | 1986                                                           |
| Borneo lowland rain forests                  | 0.497                         | 492755                             | 223205                                  | 51434                                                          |
| Borneo montane rain forests                  | 0.565                         | 97094                              | 7673                                    | 3126                                                           |
| Borneo peat swamp forests                    | 0.487                         | 77946                              | 46869                                   | 10641                                                          |
| Buru rain forests                            | 0.643                         | 8401                               | 4589                                    | 2321                                                           |
| Caatinga                                     | 0.576                         | 68                                 | 66                                      | 28                                                             |
| Caatinga Enclaves moist forests              | 0.681                         | 5581                               | 5545                                    | 4453                                                           |
| Cameroonian Highlands forests                | 0.564                         | 14933                              | 14627                                   | 6259                                                           |
| Campos Rupestres montane savanna             | 0.511                         | 2558                               | 2490                                    | 171                                                            |
| Caqueta moist forests                        | 0.492                         | 214518                             | 24692                                   | 6983                                                           |
| Cardamom Mountains rain forests              | 0.462                         | 51076                              | 35400                                   | 2328                                                           |
| Catatumbo moist forests                      | 0.651                         | 26151                              | 19887                                   | 14667                                                          |
| Cauca Valley dry forests                     | 0.516                         | 3316                               | 3309                                    | 726                                                            |
| Cauca Valley montane forests                 | 0.726                         | 2173                               | 1403                                    | 1300                                                           |
| Central African mangroves                    | 0.294                         | 68                                 | 64                                      | 0                                                              |
| Central American Atlantic moist forests      | 0.534                         | 102852                             | 60727                                   | 17353                                                          |
| Central American dry forests                 | 0.522                         | 36                                 | 33                                      | 8                                                              |
| Central American montane forests             | 0.618                         | 2205                               | 1319                                    | 751                                                            |
| Central American pine-oak forests            | 0.489                         | 670                                | 311                                     | 67                                                             |
| Central Congolian lowland forests            | 0.398                         | 482878                             | 37053                                   | 17                                                             |
| Central Deccan Plateau dry deciduous forests | 0.473                         | 30                                 | 29                                      | 0                                                              |
| Central Indochina dry forests                | 0.439                         | 112                                | 108                                     | 12                                                             |
| Central Range montane rain forests           | 0.546                         | 72000                              | 6139                                    | 2059                                                           |
| Central Range sub-alpine grasslands          | 0.472                         | 197                                | 34                                      | 7                                                              |
| Cerrado                                      | 0.403                         | 17962                              | 4927                                    | 154                                                            |
| <b>Ecoregion</b>                             | <b>Mean Restoration</b>       | <b>Study Area</b>                  | <b>Restorable Area (Km<sup>2</sup>)</b> | <b>Restoration Score <math>\geq</math>0.6</b>                  |

|                                             | Score                   | (km <sup>2</sup> ) |                                         | (Km <sup>2</sup> )                             |
|---------------------------------------------|-------------------------|--------------------|-----------------------------------------|------------------------------------------------|
| Chao Phraya freshwater swamp forests        | 0.411                   | 46094              | 45637                                   | 1129                                           |
| Chao Phraya lowland moist deciduous forests | 0.479                   | 24079              | 23789                                   | 2874                                           |
| Chhota-Nagpur dry deciduous forests         | 0.473                   | 5                  | 5                                       | 0                                              |
| Chiapas Depression dry forests              | 0.653                   | 3                  | 3                                       | 3                                              |
| Chiapas montane forests                     | 0.716                   | 1578               | 1114                                    | 1031                                           |
| Chimalapas montane forests                  | 0.678                   | 1128               | 1050                                    | 865                                            |
| Chin Hills-Arakan Yoma montane forests      | 0.556                   | 12430              | 12219                                   | 3968                                           |
| Chiquitano dry forests                      | 0.462                   | 33                 | 12                                      | 0                                              |
| Chocó-Darién moist forests                  | 0.474                   | 82808              | 11819                                   | 2512                                           |
| Cordillera La Costa montane forests         | 0.671                   | 12233              | 7364                                    | 5531                                           |
| Cordillera Oriental montane forests         | 0.668                   | 28287              | 17772                                   | 14418                                          |
| Costa Rican seasonal moist forests          | 0.567                   | 9991               | 9400                                    | 2619                                           |
| Cross-Niger transition forests              | 0.696                   | 24101              | 24101                                   | 20111                                          |
| Cross-Sanaga-Bioko coastal forests          | 0.531                   | 57193              | 56273                                   | 17808                                          |
| Cuban cactus scrub                          | 0.628                   | 12                 | 11                                      | 5                                              |
| Cuban dry forests                           | 0.426                   | 92                 | 86                                      | 3                                              |
| Cuban moist forests                         | 0.549                   | 24853              | 20095                                   | 7554                                           |
| Cuban pine forests                          | 0.499                   | 460                | 326                                     | 38                                             |
| Dry Chaco                                   | 0.454                   | 4                  | 4                                       | 0                                              |
| East African mangroves                      | 0.318                   | 94                 | 94                                      | 1                                              |
| East African montane forests                | 0.659                   | 1567               | 1328                                    | 942                                            |
| East Sudanian savanna                       | 0.575                   | 10                 | 3                                       | 2                                              |
| Eastern Arc forests                         | 0.655                   | 7647               | 2464                                    | 1791                                           |
| Eastern Congolian swamp forests             | 0.346                   | 105806             | 21393                                   | 380                                            |
| Eastern Cordillera real montane forests     | 0.669                   | 28286              | 10356                                   | 7404                                           |
| Eastern Guinean forests                     | 0.597                   | 221111             | 220996                                  | 110724                                         |
| Eastern highlands moist deciduous forests   | 0.532                   | 414086             | 403779                                  | 102845                                         |
| Eastern Java-Bali montane rain forests      | 0.586                   | 13681              | 12647                                   | 5582                                           |
| Eastern Java-Bali rain forests              | 0.490                   | 61667              | 60791                                   | 11388                                          |
| Eastern Miombo woodlands                    | 0.547                   | 42                 | 26                                      | 9                                              |
| Eastern Panamanian montane forests          | 0.508                   | 2771               | 205                                     | 35                                             |
| Ecuadorian dry forests                      | 0.450                   | 5                  | 3                                       | 0                                              |
| Ethiopian montane forests                   | 0.488                   | 21791              | 1490                                    | 309                                            |
| Ethiopian montane grasslands and woodlands  | 0.323                   | 2526               | 5                                       | 0                                              |
| Goadavari-Krishna mangroves                 | 0.361                   | 11                 | 10                                      | 0                                              |
| Greater Negros-Panay rain forests           | 0.593                   | 39832              | 39405                                   | 14378                                          |
| Guajira-Barranquilla xeric scrub            | 0.621                   | 2                  | 2                                       | 1                                              |
| Guayaquil flooded grasslands                | 0.372                   | 1                  | 1                                       | 0                                              |
| Guianan freshwater swamp forests            | 0.458                   | 9014               | 3947                                    | 503                                            |
| Guianan Highlands moist forests             | 0.505                   | 154702             | 8167                                    | 2481                                           |
| Guianan moist forests                       | 0.449                   | 557336             | 41571                                   | 4838                                           |
| <b>Ecoregion</b>                            | <b>Mean Restoration</b> | <b>Study Area</b>  | <b>Restorable Area (Km<sup>2</sup>)</b> | <b>Restoration Score <math>\geq 0.6</math></b> |

|                                               | Score                   | (km <sup>2</sup> ) |                                         | (Km <sup>2</sup> )                             |
|-----------------------------------------------|-------------------------|--------------------|-----------------------------------------|------------------------------------------------|
| Guianan piedmont and lowland moist forests    | 0.438                   | 266156             | 28199                                   | 3084                                           |
| Guianan savanna                               | 0.415                   | 1143               | 604                                     | 11                                             |
| Guinean forest-savanna mosaic                 | 0.595                   | 50                 | 49                                      | 21                                             |
| Guinean mangroves                             | 0.530                   | 18                 | 17                                      | 3                                              |
| Guinean montane forests                       | 0.677                   | 32205              | 32133                                   | 24186                                          |
| Gurupa varzeá                                 | 0.459                   | 10750              | 8744                                    | 1001                                           |
| Hainan Island monsoon rain forests            | 0.437                   | 18677              | 18605                                   | 119                                            |
| Halmahera rain forests                        | 0.539                   | 29617              | 5842                                    | 723                                            |
| Hispaniolan dry forests                       | 0.603                   | 31                 | 30                                      | 13                                             |
| Hispaniolan moist forests                     | 0.631                   | 54527              | 51604                                   | 31791                                          |
| Hispaniolan pine forests                      | 0.521                   | 3957               | 3587                                    | 396                                            |
| Huon Peninsula montane rain forests           | 0.614                   | 9047               | 3741                                    | 1171                                           |
| Indochina mangroves                           | 0.307                   | 48                 | 38                                      | 1                                              |
| Iquitos varzeá                                | 0.481                   | 134363             | 26970                                   | 3373                                           |
| Irrawaddy dry forests                         | 0.403                   | 38141              | 20147                                   | 440                                            |
| Irrawaddy freshwater swamp forests            | 0.270                   | 18321              | 17338                                   | 0                                              |
| Irrawaddy moist deciduous forests             | 0.455                   | 139065             | 123139                                  | 16846                                          |
| Isthmian-Atlantic moist forests               | 0.527                   | 68028              | 42352                                   | 6363                                           |
| Isthmian-Pacific moist forests                | 0.587                   | 32401              | 28577                                   | 11919                                          |
| Jamaican dry forests                          | 0.638                   | 11                 | 10                                      | 1                                              |
| Jamaican moist forests                        | 0.642                   | 9837               | 7274                                    | 4582                                           |
| Japurá-Solimoes-Negro moist forests           | 0.342                   | 311714             | 20769                                   | 222                                            |
| Jian Nan subtropical evergreen forests        | 0.445                   | 35145              | 35116                                   | 379                                            |
| Juruá-Purus moist forests                     | 0.322                   | 283209             | 5765                                    | 0                                              |
| Kayah-Karen montane rain forests              | 0.546                   | 116062             | 114294                                  | 44723                                          |
| Kinabalu montane alpine meadows               | 0.477                   | 2908               | 1431                                    | 73                                             |
| La Costa xeric shrublands                     | 0.663                   | 28                 | 21                                      | 15                                             |
| Lake                                          | 0.371                   | 9                  | 7                                       | 0                                              |
| Llanos                                        | 0.515                   | 27                 | 22                                      | 4                                              |
| Lower Gangetic Plains moist deciduous forests | 0.292                   | 57099              | 55606                                   | 135                                            |
| Luang Prabang montane rain forests            | 0.526                   | 64366              | 61038                                   | 15591                                          |
| Luzon montane rain forests                    | 0.619                   | 6601               | 3385                                    | 1896                                           |
| Luzon rain forests                            | 0.528                   | 109445             | 95920                                   | 23410                                          |
| Luzon tropical pine forests                   | 0.455                   | 1778               | 1568                                    | 28                                             |
| Madagascar dry deciduous forests              | 0.663                   | 38                 | 38                                      | 31                                             |
| Madagascar lowland forests                    | 0.601                   | 111029             | 91425                                   | 43488                                          |
| Madagascar spiny thickets                     | 0.595                   | 80                 | 80                                      | 31                                             |
| Madagascar subhumid forests                   | 0.677                   | 130560             | 128231                                  | 103335                                         |
| Madagascar succulent woodlands                | 0.615                   | 7                  | 6                                       | 4                                              |
| Madeira-Tapajós moist forests                 | 0.491                   | 844943             | 198780                                  | 27543                                          |
| Magdalena Valley dry forests                  | 0.615                   | 13                 | 12                                      | 5                                              |
| <b>Ecoregion</b>                              | <b>Mean Restoration</b> | <b>Study Area</b>  | <b>Restorable Area (Km<sup>2</sup>)</b> | <b>Restoration Score <math>\geq 0.6</math></b> |

|                                                               | Score       | (km <sup>2</sup> ) |                   | (Km <sup>2</sup> ) |
|---------------------------------------------------------------|-------------|--------------------|-------------------|--------------------|
| Magdalena Valley montane forests                              | 0.726       | 34850              | 19945             | 18909              |
| Magdalena-Urabá moist forests                                 | 0.631       | 89370              | 81645             | 62630              |
| Malabar Coast moist forests                                   | 0.500       | 41197              | 41092             | 7223               |
| Maracaibo dry forests                                         | 0.561       | 15                 | 11                | 1                  |
| Marajó varzea                                                 | 0.467       | 97214              | 50835             | 5876               |
| Maranhão Babaçu forests                                       | 0.598       | 165937             | 136509            | 75897              |
| Marañón dry forests                                           | 0.707       | 5                  | 4                 | 2                  |
| Mato Grosso seasonal forests                                  | 0.511       | 488646             | 243856            | 57755              |
| Meseta Central matorral                                       | 0.501       | 1                  | 1                 | 0                  |
| Mesoamerican Gulf-Caribbean mangroves                         | 0.283       | 297                | 287               | 0                  |
| Mindanao montane rain forests                                 | 0.709       | 10394              | 8155              | 6767               |
| Mindanao-Eastern Visayas rain forests                         | 0.610       | 121717             | 106156            | 44781              |
| Mindoro rain forests                                          | 0.568       | 10439              | 10251             | 3546               |
| Miskito pine forests                                          | 0.324       | 1982               | 1662              | 1                  |
| Mizoram-Manipur-Kachin rain forests                           | 0.550       | 44400              | 43749             | 6732               |
| Monte Alegre varzea                                           | 0.439       | 74488              | 28074             | 946                |
| Motagua Valley thornscrub                                     | 0.411       | 2                  | 2                 | 0                  |
| Mount Cameroon and Bioko montane forests                      | 0.715       | 531                | 531               | 446                |
| Myanmar Coast mangroves                                       | 0.318       | 42                 | 34                | 3                  |
| Myanmar coastal rain forests                                  | 0.422       | 80009              | 74572             | 1215               |
| Napo moist forests                                            | 0.514       | 292727             | 31377             | 7101               |
| Narmada Valley dry deciduous forests                          | 0.570       | 4                  | 4                 | 2                  |
| Negro-Branco moist forests                                    | 0.389       | 234852             | 26409             | 1847               |
| New Britain-New Ireland lowland rain forests                  | 0.522       | 40399              | 7318              | 455                |
| New Britain-New Ireland montane rain forests                  | 0.596       | 8828               | 452               | 182                |
| New Guinea mangroves                                          | 0.306       | 209                | 71                | 0                  |
| Niger Delta swamp forests                                     | 0.574       | 16788              | 16788             | 7645               |
| Nigerian lowland forests                                      | 0.595       | 77913              | 77906             | 45036              |
| North Western Ghats moist deciduous forests                   | 0.501       | 57072              | 55210             | 6452               |
| North Western Ghats montane rain forests                      | 0.525       | 35181              | 35147             | 8929               |
| Northeastern Brazil restingas                                 | 0.544       | 10954              | 10325             | 2306               |
| Northeastern Congolian lowland forests                        | 0.415       | 581317             | 136663            | 6041               |
| Northern Annamites rain forests                               | 0.498       | 53482              | 42473             | 4082               |
| Northern Congolian forest-savanna mosaic                      | 0.454       | 28                 | 23                | 4                  |
| Northern dry deciduous forests                                | 0.499       | 72108              | 70342             | 3691               |
| Northern Indochina subtropical forests                        | 0.604       | 234780             | 226819            | 136743             |
| Northern Khorat Plateau moist deciduous forests               | 0.454       | 20555              | 20335             | 1705               |
| Northern New Guinea lowland rain and freshwater swamp forests | 0.477       | 157276             | 46482             | 8158               |
| Northern New Guinea montane rain forests                      | 0.550       | 24898              | 1402              | 418                |
| Northern Thailand-Laos moist deciduous forests                | 0.544       | 50017              | 49732             | 20163              |
| Northern Vietnam lowland rain forests                         | 0.456       | 27379              | 25747             | 2180               |
| <b>Ecoregion</b>                                              | <b>Mean</b> | <b>Study</b>       | <b>Restorable</b> | <b>Restoration</b> |

|                                                      | <b>Restoration Score</b>      | <b>Area (km<sup>2</sup>)</b>       | <b>Area (Km<sup>2</sup>)</b>            | <b>Score ≥0.6 (Km<sup>2</sup>)</b>             |
|------------------------------------------------------|-------------------------------|------------------------------------|-----------------------------------------|------------------------------------------------|
| Northern Zanzibar-Inhambane coastal forest mosaic    | 0.506                         | 129322                             | 95529                                   | 21333                                          |
| Northwestern Andean montane forests                  | 0.661                         | 25027                              | 6332                                    | 4844                                           |
| Northwestern Congolian lowland forests               | 0.386                         | 505721                             | 235918                                  | 13291                                          |
| Oaxacan montane forests                              | 0.624                         | 1592                               | 731                                     | 467                                            |
| Orinoco Delta swamp forests                          | 0.396                         | 33041                              | 11488                                   | 297                                            |
| Orinoco wetlands                                     | 0.437                         | 10                                 | 3                                       | 0                                              |
| Orissa semi-evergreen forests                        | 0.359                         | 26669                              | 24670                                   | 742                                            |
| Palawan rain forests                                 | 0.522                         | 16071                              | 11409                                   | 739                                            |
| Panamanian dry forests                               | 0.486                         | 93                                 | 84                                      | 9                                              |
| Pantanos de Centla                                   | 0.355                         | 20893                              | 20646                                   | 68                                             |
| Pantepui                                             | 0.528                         | 28492                              | 1655                                    | 519                                            |
| Paraguana xeric scrub                                | 0.555                         | 2                                  | 2                                       | 1                                              |
| Patía Valley dry forests                             | 0.580                         | 5                                  | 4                                       | 1                                              |
| Peninsular Malaysian montane rain forests            | 0.556                         | 13992                              | 1851                                    | 731                                            |
| Peninsular Malaysian peat swamp forests              | 0.407                         | 4221                               | 1746                                    | 2                                              |
| Peninsular Malaysian rain forests                    | 0.430                         | 142732                             | 92256                                   | 11580                                          |
| Pernambuco coastal forests                           | 0.618                         | 20446                              | 20298                                   | 12811                                          |
| Pernambuco interior forests                          | 0.608                         | 26480                              | 26168                                   | 14189                                          |
| Peruvian Yungas                                      | 0.677                         | 21020                              | 3377                                    | 2569                                           |
| Petén-Veracruz moist forests                         | 0.486                         | 173981                             | 117118                                  | 16269                                          |
| Puerto Rican moist forests                           | 0.543                         | 8695                               | 7563                                    | 2337                                           |
| Purus varzea                                         | 0.335                         | 205800                             | 30454                                   | 44                                             |
| Purus-Madeira moist forests                          | 0.440                         | 203981                             | 16462                                   | 32                                             |
| Red River freshwater swamp forests                   | 0.341                         | 13284                              | 12968                                   | 156                                            |
| Rio Negro campinarana                                | 0.364                         | 111795                             | 32269                                   | 226                                            |
| Santa Marta montane forests                          | 0.677                         | 656                                | 268                                     | 213                                            |
| Sao Tome. Principe and Annobon moist lowland forests | NA                            | 965                                | 616                                     | 0                                              |
| Seram rain forests                                   | 0.585                         | 20987                              | 5008                                    | 647                                            |
| Serra do Mar coastal forests                         | 0.639                         | 40674                              | 36582                                   | 24373                                          |
| Sierra de los Tuxtlas                                | 0.504                         | 4479                               | 4321                                    | 766                                            |
| Sierra Madre de Chiapas moist forests                | 0.579                         | 10423                              | 9257                                    | 4217                                           |
| Sierra Madre de Oaxaca pine-oak forests              | 0.403                         | 117                                | 61                                      | 1                                              |
| Sierra Madre Oriental pine-oak forests               | 0.453                         | 5                                  | 3                                       | 1                                              |
| Sinú Valley dry forests                              | 0.737                         | 9                                  | 5                                       | 4                                              |
| Solimões-Japurá moist forests                        | 0.321                         | 195426                             | 4601                                    | 48                                             |
| Somali Acacia-Commiphora bushlands and thickets      | 0.394                         | 19                                 | 12                                      | 0                                              |
| South American Pacific mangroves                     | 0.250                         | 10                                 | 5                                       | 0                                              |
| South China-Vietnam subtropical evergreen forests    | 0.455                         | 245505                             | 244585                                  | 24363                                          |
| South Deccan Plateau dry deciduous forests           | 0.458                         | 3                                  | 2                                       | 0                                              |
| <b>Ecoregion</b>                                     | <b>Mean Restoration Score</b> | <b>Study Area (km<sup>2</sup>)</b> | <b>Restorable Area (Km<sup>2</sup>)</b> | <b>Restoration Score ≥0.6 (Km<sup>2</sup>)</b> |



|                                                       |                               |                                    |                                         |                                                |
|-------------------------------------------------------|-------------------------------|------------------------------------|-----------------------------------------|------------------------------------------------|
| South Western Ghats moist deciduous forests           | 0.546                         | 25133                              | 24738                                   | 7736                                           |
| South Western Ghats montane rain forests              | 0.567                         | 19854                              | 19583                                   | 9047                                           |
| Southeastern Indochina dry evergreen forests          | 0.509                         | 20                                 | 12                                      | 6                                              |
| Southeastern Papuan rain forests                      | 0.542                         | 61301                              | 20315                                   | 3454                                           |
| Southern Andean Yungas                                | 0.517                         | 18143                              | 10019                                   | 1822                                           |
| Southern Annamites montane rain forests               | 0.595                         | 34418                              | 24373                                   | 12985                                          |
| Southern Atlantic mangroves                           | 0.512                         | 15                                 | 14                                      | 4                                              |
| Southern Congolian forest-savanna mosaic              | 0.387                         | 53                                 | 23                                      | 0                                              |
| Southern Mesoamerican Pacific mangroves               | 0.358                         | 11                                 | 8                                       | 0                                              |
| Southern Miombo woodlands                             | 0.256                         | 3                                  | 3                                       | 0                                              |
| Southern New Guinea freshwater swamp forests          | 0.380                         | 116381                             | 60328                                   | 529                                            |
| Southern New Guinea lowland rain forests              | 0.372                         | 143884                             | 27951                                   | 47                                             |
| Southern Pacific dry forests                          | 0.553                         | 5                                  | 4                                       | 1                                              |
| Southern Vietnam lowland dry forests                  | 0.519                         | 22                                 | 19                                      | 5                                              |
| Southern Zanzibar-Inhambane coastal forest mosaic     | 0.485                         | 153484                             | 148010                                  | 20044                                          |
| Southwest Amazon moist forests                        | 0.446                         | 868138                             | 89206                                   | 5662                                           |
| Southwest Borneo freshwater swamp forests             | 0.535                         | 42479                              | 30473                                   | 11045                                          |
| Sri Lanka dry-zone dry evergreen forests              | 0.479                         | 6                                  | 6                                       | 1                                              |
| Sri Lanka lowland rain forests                        | 0.540                         | 14323                              | 13364                                   | 3668                                           |
| Sri Lanka montane rain forests                        | 0.537                         | 747                                | 714                                     | 284                                            |
| Sulawesi lowland rain forests                         | 0.606                         | 129641                             | 81495                                   | 32371                                          |
| Sulawesi montane rain forests                         | 0.682                         | 47467                              | 18133                                   | 14248                                          |
| Sumatran freshwater swamp forests                     | 0.442                         | 20755                              | 18052                                   | 2114                                           |
| Sumatran lowland rain forests                         | 0.475                         | 299371                             | 217123                                  | 39786                                          |
| Sumatran montane rain forests                         | 0.666                         | 32569                              | 16403                                   | 12439                                          |
| Sumatran peat swamp forests                           | 0.456                         | 100960                             | 67620                                   | 9727                                           |
| Sumatran tropical pine forests                        | 0.529                         | 421                                | 67                                      | 4                                              |
| Sunda Shelf mangroves                                 | 0.351                         | 212                                | 100                                     | 8                                              |
| Sundaland heath forests                               | 0.509                         | 88908                              | 57546                                   | 14664                                          |
| Sundarbans freshwater swamp forests                   | 0.230                         | 17815                              | 17744                                   | 0                                              |
| Sundarbans mangroves                                  | 0.229                         | 10                                 | 10                                      | 0                                              |
| Talamancan montane forests                            | 0.571                         | 5587                               | 2149                                    | 885                                            |
| Tapajós-Xingu moist forests                           | 0.477                         | 392575                             | 35510                                   | 2216                                           |
| Tenasserim-South Thailand semi-evergreen rain forests | 0.537                         |                                    | 80817                                   | 19417                                          |
| Tocantins/Pindare moist forests                       | 0.531                         |                                    | 130706                                  | 19971                                          |
| Tonle Sap freshwater swamp forests                    | 0.342                         |                                    | 27123                                   | 49                                             |
| Tonle Sap-Mekong peat swamp forests                   | 0.385                         |                                    | 31172                                   | 247                                            |
| Trans Fly savanna and grasslands                      | 0.350                         |                                    | 12                                      | 0                                              |
| Trinidad and Tobago moist forests                     | 0.604                         |                                    | 2235                                    | 1021                                           |
| Trobriand Islands rain forests                        | 0.535                         |                                    | 1678                                    | 10                                             |
| Tumbes-Piura dry forests                              | 0.605                         |                                    | 16                                      | 8                                              |
| <b>Ecoregion</b>                                      | <b>Mean Restoration Score</b> | <b>Study Area (km<sup>2</sup>)</b> | <b>Restorable Area (Km<sup>2</sup>)</b> | <b>Restoration Score ≥0.6 (Km<sup>2</sup>)</b> |

|                                              |       |  |        |       |
|----------------------------------------------|-------|--|--------|-------|
| Uatuma-Trombetas moist forests               | 0.459 |  | 57378  | 3668  |
| Ucayali moist forests                        | 0.652 |  | 16313  | 11826 |
| Venezuelan Andes montane forests             | 0.675 |  | 10647  | 8746  |
| Veracruz dry forests                         | 0.531 |  | 6      | 1     |
| Veracruz moist forests                       | 0.453 |  | 66156  | 5563  |
| Veracruz montane forests                     | 0.656 |  | 1706   | 1541  |
| Vogelkop montane rain forests                | 0.592 |  | 1046   | 262   |
| Vogelkop-Aru lowland rain forests            | 0.483 |  | 11518  | 1195  |
| West Sudanian savanna                        | 0.512 |  | 5      | 1     |
| Western Congolian forest-savanna mosaic      | 0.419 |  | 27     | 2     |
| Western Congolian swamp forests              | 0.367 |  | 57594  | 1353  |
| Western Ecuador moist forests                | 0.449 |  | 16443  | 544   |
| Western Guinean lowland forests              | 0.464 |  | 239623 | 26765 |
| Western Java montane rain forests            | 0.621 |  | 22206  | 12341 |
| Western Java rain forests                    | 0.517 |  | 46175  | 12222 |
| Xingu-Tocantins-Araguaia moist forests       | 0.507 |  | 114548 | 21264 |
| Yucatán dry forests                          | 0.307 |  | 8      | 0     |
| Yucatán moist forests                        | 0.419 |  | 25969  | 0     |
| Yunnan Plateau subtropical evergreen forests | 0.553 |  | 212    | 78    |
| Zambeziian coastal flooded savanna           | 0.437 |  | 6      | 0     |

**Table S3. Mean ROS, study area, restorable area, and restorable area with a restoration score of >0.6 of KBAs within tropical rainforest landscapes.**

| Key Biodiversity Area                   | Country                          | Mean Restoration Score | Study Area (km <sup>2</sup> ) | Restorable Area (km <sup>2</sup> ) | Restoration Score ≥0.6 (km <sup>2</sup> ) |
|-----------------------------------------|----------------------------------|------------------------|-------------------------------|------------------------------------|-------------------------------------------|
| Alto Purus                              | Peru                             | 0.255                  | 32205                         | 448                                | 0                                         |
| Alto Sucunduri                          | Brazil                           | 0.402                  | 54509                         | 2296                               | 16                                        |
| Bahuaja-Sonene                          | Peru                             | 0.397                  | 11172                         | 653                                | 1                                         |
| Baixada Maranhense                      | Brazil                           | 0.525                  | 20773                         | 18066                              | 2653                                      |
| Baixo Rio Xingu                         | Brazil                           | 0.430                  | 7286                          | 993                                | 0                                         |
| Belize Coastal and near shore islands   | Belize                           | 0.329                  | 1880                          | 843                                | 0                                         |
| Betung Kerihun                          | Indonesia                        | 0.542                  | 7788                          | 6                                  | 2                                         |
| Bosawas                                 | Nicaragua                        | 0.568                  | 9244                          | 1192                               | 344                                       |
| Campinas e Várzeas do Rio Branco        | Brazil                           | 0.385                  | 43370                         | 17051                              | 174                                       |
| Campos de Humaitá-Lábrea                | Brazil                           | 0.397                  | 32154                         | 4328                               | 7                                         |
| Caruachi                                | Venezuela                        | 0.411                  | 2362                          | 1558                               | 95                                        |
| Caxiuaná / Portel                       | Brazil                           | 0.405                  | 40078                         | 3287                               | 30                                        |
| Centraal Suriname Nature Reserve (CSNR) | Suriname                         | 0.310                  | 18773                         | 103                                | 0                                         |
| Centro de Veracruz                      | Mexico                           | 0.621                  | 1839                          | 1814                               | 1149                                      |
| Cerrados do Nordeste de Tocantins       | Brazil                           | 0.576                  | 1053                          | 1053                               | 662                                       |
| Cordillera del Cóndor                   | Peru                             | 0.484                  | 15486                         | 550                                | 56                                        |
| Cordillera Vilcabamba                   | Peru                             | 0.588                  | 14018                         | 1169                               | 489                                       |
| Cristalino / Serra do Cachimbo          | Brazil                           | 0.481                  | 13331                         | 4176                               | 976                                       |
| Dja Faunal Reserve                      | Cameroon                         | 0.277                  | 7309                          | 4733                               | 1                                         |
| Este de Río Mamoré                      | Bolivia                          | 0.397                  | 1264                          | 1197                               | 9                                         |
| Gamba Protected Areas Complex           | Gabon                            | 0.341                  | 14252                         | 9972                               | 49                                        |
| Goiabal / Piratuba                      | Brazil                           | 0.466                  | 7520                          | 7060                               | 534                                       |
| Gran Yasuní                             | Ecuador                          | 0.281                  | 19093                         | 294                                | 4                                         |
| Greater Mahale                          | Tanzania                         | 0.540                  | 72                            | 36                                 | 16                                        |
| Gunung Leuser                           | Indonesia                        | 0.576                  | 4489                          | 550                                | 289                                       |
| Gurupi                                  | Brazil                           | 0.510                  | 16312                         | 2104                               | 145                                       |
| Ilha de Marajó                          | Brazil                           | 0.493                  | 44993                         | 20404                              | 4105                                      |
| Istmo de Tehuantepec-Mar Muerto         | Mexico                           | 0.578                  | 77                            | 70                                 | 30                                        |
| Itombwe Mountains                       | Democratic Republic of the Congo | 0.677                  | 317                           | 4                                  | 4                                         |
| Jamanxim / Altamira                     | Brazil                           | 0.331                  | 19200                         | 310                                | 0                                         |
| Jamari                                  | Brazil                           | 0.441                  | 9098                          | 917                                | 0                                         |
| Ji-Paraná / Roosevelt                   | Brazil                           | 0.388                  | 13176                         | 386                                | 0                                         |
| Kabalebo / Arapahu                      | Suriname                         | 0.287                  | 19726                         | 572                                | 0                                         |
| Kayan Mentarang                         | Indonesia                        | 0.629                  | 7085                          | 196                                | 135                                       |
| Kerinci Seblat                          | Indonesia                        | 0.621                  | 7375                          | 618                                | 365                                       |
| Kidepo                                  | South Sudan                      | 0.654                  | 1081                          | 1079                               | 725                                       |
| Lavrados de Roraima                     | Brazil                           | 0.455                  | 503                           | 471                                | 3                                         |

| <b>Key Biodiversity Area</b>                  | <b>Country</b>                   | <b>Mean Restoration Score</b> | <b>Study Area (km<sup>2</sup>)</b> | <b>Restorable Area (km<sup>2</sup>)</b> | <b>Restoration Score <math>\geq 0.6</math> (km<sup>2</sup>)</b> |
|-----------------------------------------------|----------------------------------|-------------------------------|------------------------------------|-----------------------------------------|-----------------------------------------------------------------|
| Lower Central Basin                           | Thailand                         | 0.401                         | 14911                              | 14893                                   | 122                                                             |
| Maiko National Park                           | Democratic Republic of the Congo | 0.305                         | 12010                              | 31                                      | 0                                                               |
| Mamirauá                                      | Brazil                           | 0.360                         | 15270                              | 2712                                    | 1                                                               |
| Manu                                          | Peru                             | 0.357                         | 15060                              | 675                                     | 25                                                              |
| Marungu highlands                             | Democratic Republic of the Congo | 0.640                         | 37                                 | 37                                      | 24                                                              |
| Maya - Lacandón                               | Guatemala                        | 0.500                         | 25559                              | 10078                                   | 701                                                             |
| Maya Mountains and southern reserves          | Belize                           | 0.419                         | 7566                               | 772                                     | 2                                                               |
| Metu - Gore - Tepi forests                    | Ethiopia                         | 0.469                         | 1325                               | 946                                     | 132                                                             |
| Minkébé Forest Reserve                        | Gabon                            | 0.338                         | 8791                               | 5781                                    | 0                                                               |
| Miskito Keys and terrestrial landscape        | Nicaragua                        | 0.328                         | 173                                | 166                                     | 0                                                               |
| Myeik Archipelago                             | Myanmar                          | 0.420                         | 2708                               | 1662                                    | 1                                                               |
| Myinmoletkhat                                 | Myanmar                          | 0.483                         | 9468                               | 4759                                    | 134                                                             |
| Ngiri                                         | Democratic Republic of the Congo | 0.355                         | 23550                              | 7601                                    | 0                                                               |
| Noel Kempff Mercado                           | Bolivia                          | 0.345                         | 6521                               | 1183                                    | 11                                                              |
| Novo Progresso                                | Brazil                           | 0.442                         | 30929                              | 817                                     | 2                                                               |
| Ntokou Pikounda Reserve                       | Congo                            | 0.304                         | 20957                              | 2341                                    | 0                                                               |
| Odzala National Park complex                  | Congo                            | 0.397                         | 15852                              | 2191                                    | 304                                                             |
| Oeste de Río Mamoré                           | Bolivia                          | 0.390                         | 985                                | 919                                     | 23                                                              |
| Okapi Faunal Reserve                          | Democratic Republic of the Congo | 0.346                         | 15883                              | 227                                     | 20                                                              |
| Parc Amazonien de Guyane et Saül              | French Guiana                    | 0.446                         | 24504                              | 25                                      | 0                                                               |
| Parque Nacional Canaima                       | Venezuela                        | 0.500                         | 15813                              | 2175                                    | 588                                                             |
| Parque Nacional Cordillera Azul               | Peru                             | 0.472                         | 9880                               | 77                                      | 16                                                              |
| Parque Nacional da Amazônia                   | Brazil                           | 0.359                         | 13037                              | 85                                      | 0                                                               |
| Parque Nacional da Serra do Divisor           | Brazil                           | 0.434                         | 9891                               | 147                                     | 0                                                               |
| Parque Nacional do Jaú                        | Brazil                           | 0.289                         | 27675                              | 1089                                    | 0                                                               |
| Parque Nacional Montanhas do Tumucumaque      | Brazil                           | 0.324                         | 45246                              | 337                                     | 4                                                               |
| Parque Nacional Natural Chiribiquete          | Colombia                         | 0.378                         | 15233                              | 1888                                    | 62                                                              |
| Parque Nacional Natural Sierra de la Macarena | Colombia                         | 0.537                         | 6636                               | 933                                     | 200                                                             |
| Parque Nacional Parima-Tapirapécó             | Venezuela                        | 0.420                         | 41792                              | 537                                     | 87                                                              |
| Parque Nacional Serranía La Neblina           | Venezuela                        | 0.341                         | 15522                              | 96                                      | 4                                                               |

| <b>Key Biodiversity Area</b>              | <b>Country</b>                   | <b>Mean Restoration Score</b> | <b>Study Area (km<sup>2</sup>)</b> | <b>Restorable Area (km<sup>2</sup>)</b> | <b>Restoration Score <math>\geq 0.6</math> (km<sup>2</sup>)</b> |
|-------------------------------------------|----------------------------------|-------------------------------|------------------------------------|-----------------------------------------|-----------------------------------------------------------------|
| Rawa di Pesisir Kapuas                    | Indonesia                        | 0.484                         | 6330                               | 1810                                    | 118                                                             |
| Reentrâncias Maranhenses / Paraenses      | Brazil                           | 0.470                         | 2387                               | 1908                                    | 2                                                               |
| Reserva Comunal El Sira                   | Peru                             | 0.492                         | 3303                               | 115                                     | 3                                                               |
| Reserva de Inmovilización Iténez          | Bolivia                          | 0.293                         | 7503                               | 1026                                    | 0                                                               |
| Reserva Forestal Imataca                  | Venezuela                        | 0.448                         | 42327                              | 2785                                    | 388                                                             |
| Reserva Forestal Sipapo                   | Venezuela                        | 0.388                         | 25586                              | 4949                                    | 115                                                             |
| Reserva Nacional Amazónica Manuripi Heath | Bolivia                          | 0.363                         | 9077                               | 395                                     | 0                                                               |
| Reserva Nacional Pacaya Samiria           | Peru                             | 0.444                         | 25500                              | 2000                                    | 205                                                             |
| Rio Capim                                 | Brazil                           | 0.482                         | 25092                              | 5476                                    | 128                                                             |
| Río Conambo-Bobonaza                      | Ecuador                          | 0.422                         | 10164                              | 128                                     | 8                                                               |
| Rio Tacutu                                | Brazil                           | 0.503                         | 1126                               | 831                                     | 143                                                             |
| Salonga National Park                     | Democratic Republic of the Congo | 0.187                         | 40388                              | 370                                     | 0                                                               |
| Savanas do Amapá                          | Brazil                           | 0.497                         | 849                                | 768                                     | 26                                                              |
| Savanas do Rio Cotingo                    | Brazil                           | 0.565                         | 623                                | 360                                     | 140                                                             |
| Selous Game Reserve                       | Tanzania                         | 0.591                         | 9057                               | 6839                                    | 3954                                                            |
| Selva Zoque I                             | Mexico                           | 0.589                         | 5128                               | 1581                                    | 763                                                             |
| Serra dos Carajás                         | Brazil                           | 0.538                         | 14396                              | 850                                     | 236                                                             |
| Serranía de San Lucas                     | Colombia                         | 0.724                         | 5725                               | 1322                                    | 1268                                                            |
| Sira Communal Reserve                     | Peru                             | 0.492                         | 3303                               | 115                                     | 3                                                               |
| Southern Cardamoms                        | Cambodia                         | 0.451                         | 7862                               | 2251                                    | 211                                                             |
| Tabocais                                  | Brazil                           | 0.422                         | 87081                              | 3493                                    | 5                                                               |
| Tepuis do Amazonas                        | Brazil                           | 0.288                         | 49848                              | 674                                     | 13                                                              |
| Territorio Achuar                         | Ecuador                          | 0.334                         | 9014                               | 281                                     | 0                                                               |
| Ulu Barito                                | Indonesia                        | 0.446                         | 8766                               | 141                                     | 10                                                              |
| Vale do Guaporé                           | Brazil                           | 0.363                         | 17981                              | 8633                                    | 134                                                             |
| Várzeas de Monte Alegre                   | Brazil                           | 0.469                         | 24262                              | 20829                                   | 1910                                                            |
| Várzeas do Médio Rio Amazonas             | Brazil                           | 0.485                         | 30211                              | 23344                                   | 1610                                                            |
| Zambezi River Delta                       | Mozambique                       | 0.393                         | 4110                               | 4110                                    | 0                                                               |



**Table S4. Mean ROS, total area, restorable area, and restorable area with a restoration score of >0.6 of tropical rainforest landscapes among hotspots for biodiversity conservation.**

| <b>Biodiversity Conservation Hotspot</b> | <b>Mean Restoration Score</b> | <b>Study Area (km<sup>2</sup>)</b> | <b>Restorable Area (Km<sup>2</sup>)</b> | <b>Restoration Score ≥0.6 (Km<sup>2</sup>)</b> |
|------------------------------------------|-------------------------------|------------------------------------|-----------------------------------------|------------------------------------------------|
| Atlantic Forest                          | 0.580                         | 795,497                            | 765,257                                 | 400,147                                        |
| Indo-Burma                               | 0.496                         | 1,512,142                          | 1,377,461                               | 318,074                                        |
| Guinean Forests of West Africa           | 0.551                         | 685,373                            | 683,168                                 | 258,710                                        |
| Sundaland                                | 0.492                         | 1,569,019                          | 924,507                                 | 208,867                                        |
| Madagascar and the Indian Ocean Islands  | 0.647                         | 243,728                            | 221,538                                 | 146,889                                        |
| Philippines                              | 0.578                         | 317,833                            | 277,191                                 | 95,532                                         |
| Mesoamerica                              | 0.493                         | 597,440                            | 396,253                                 | 70,753                                         |
| Tropical Andes                           | 0.651                         | 233,410                            | 98,630                                  | 68,425                                         |
| Tumbes-Choco-Magdalena                   | 0.589                         | 201,666                            | 110,138                                 | 65,722                                         |
| Wallacea                                 | 0.622                         | 242,527                            | 117,982                                 | 50,279                                         |
| Caribbean Islands                        | 0.601                         | 102,847                            | 90,900                                  | 46,720                                         |
| Coastal Forests of Eastern Africa        | 0.491                         | 279,368                            | 240,116                                 | 39,661                                         |
| Western Ghats and Sri Lanka              | 0.526                         | 152,253                            | 148,702                                 | 36,111                                         |
| Eastern Afromontane                      | 0.624                         | 87,037                             | 15,743                                  | 9,770                                          |
| East Melanesian Islands                  | 0.532                         | 67,337                             | 11,342                                  | 636                                            |
